# Supplementary material for: Real-life impact of uncontrolled severe asthma on mortality and healthcare use in adolescents and adults: findings from the retrospective, observational RESONANCE study in France
Source: PubMed Central journal article supplement — BMJ Open. 2022 Aug 24;12(8):e060160. doi: 10.1136/bmjopen-2021-060160 (PMC9413284; doi:10.1136/bmjopen-2021-060160), 2022-08-24

## Real-life impact of uncontrolled severe asthma on mortality and healthcare use in adolescents and adults: findings from the retrospective observational RESONANCE study in France

Nicolas Roche<sup>1</sup>, Gilles Garcia<sup>2</sup>, Alexandre de Larrard<sup>3</sup>, Charlotte Cancalon<sup>3</sup>, Stève Bénard<sup>3</sup>, Vincent Perez<sup>4</sup>, Aymeric Mahieu<sup>4</sup>, Laurine Vieu<sup>4</sup>, Pascal Demoly<sup>5</sup>

### Supplementary materials

#### FIGURE S1. Patient selection algorithm

Key: ALD – affection de longue durée (long-term condition); ATC – Anatomical Therapeutic Chemical; COPD – chronic obstructive pulmonary disease; ICD-10 – International Classification of Diseases, 10th Revision; ICS – inhaled corticosteroid; LABA – long-acting  $\beta$ 2-agonist; LAMA – long-acting muscarinic antagonist; OCS – oral corticosteroid; SABA – short-acting  $\beta$ 2-agonist.

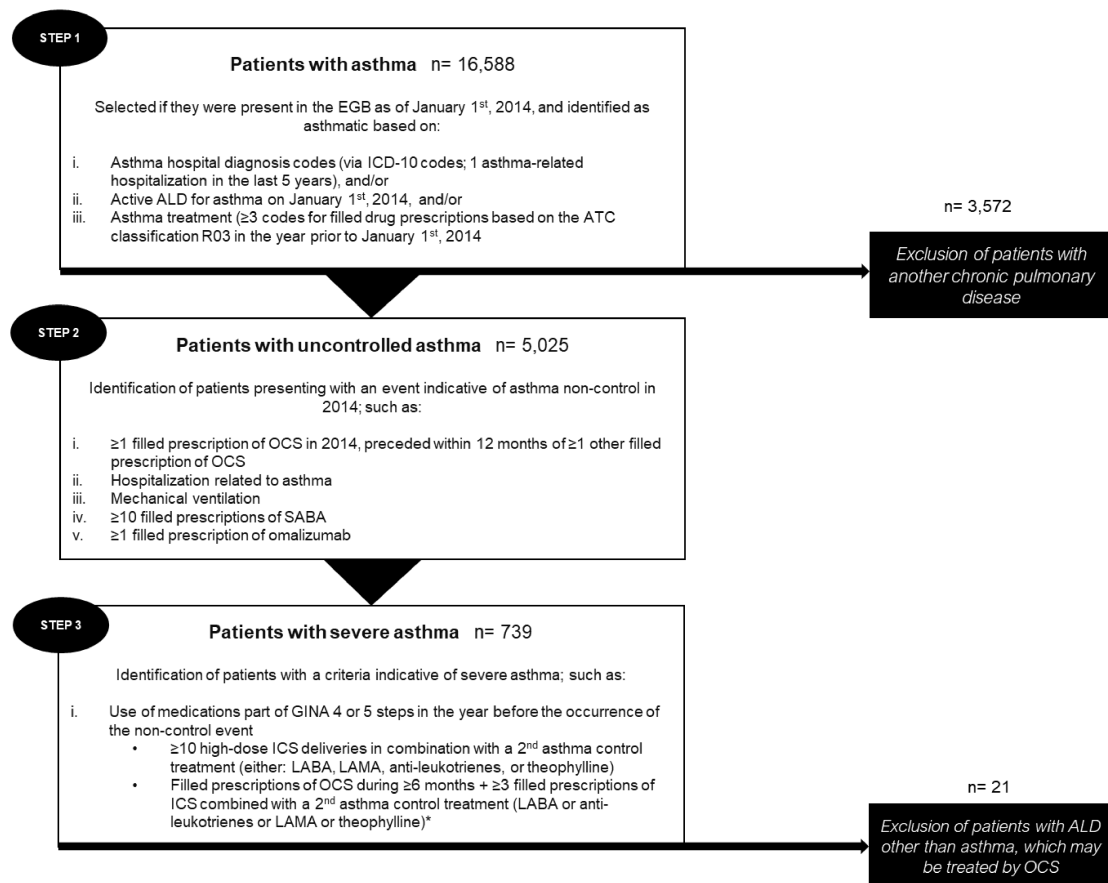

#### Footnote:

\* Of note, these criteria did not apply to patients with an ALD other than asthma (i.e. rheumatoid arthritis, ulcerative colitis, Crohn's disease, cancer, etc) who can be treated by OCS identified by an exploratory analysis of ALD of patients from the target population meeting criterion.

## Methods – Additional details on drugs of interest

### Asthma treatments:

- short-acting beta2-agonists (SABA),
- long-acting beta2-agonists (LABA),
- long-acting anticholinergics (LAMA),
- antileukotriene receptor antagonists (LTRA),
- xanthines,
- inhaled and oral corticosteroids (ICS and OCS),
- combination treatments.

### Other drug classes of interest:

- nasal antihistamines,
- antihistamines,
- nonsteroidal anti-inflammatory drugs (NSAIDs),
- antibiotics,
- proton pump inhibitors (PPIs),
- psychotropic drugs,
- topical corticosteroids,
- topical immunosuppressants.

## Methods – ICD-10 codes used

### For Asthma definition

- J45.0 Predominantly allergic asthma
- J45.1 Non-allergic asthma
- J45.8 Mixed asthma
- J45.9 Asthma, Unspecified
- J46 Status asthmaticus
- J96 Respiratory failure, not elsewhere classified

### For Other chronic pulmonary disease definition

- J41 Simple and mucopurulent chronic bronchitis
- J42 Unspecified chronic bronchitis
- J43 Emphysema
- J44 Other chronic obstructive pulmonary disease
- J47 Bronchiectasis
- J61 Pneumoconiosis due to asbestos and other mineral fiber
- J62.8 Pneumoconiosis due to other dust containing silica
- J68.0 Bronchitis due to chemicals, gases, fumes and vapors
- E84 Mucoviscidosis
- J92.0 Pleural plaque with presence of asbestos
- J94.8 Other specified pleural conditions
- J96.1+0 Insuffisance respiratoire chronique obstructive

**Methods – Variables defined for propensity score matching**

1. nasal corticosteroid (Yes/No)
2. systemic antihistamine (Yes/No)
3. non-steroidal anti-inflammatory drugs (Yes/No)
4. antibiotic (Yes/No)
5. proton pump inhibitor (Yes/No)
6. dermocorticoids (Yes/No)
7. psychotropic drug (Yes/No)
8. age (years)
9. number of outpatient consultations
10. charlson's score
11. consultation with a nurse (Yes/No)
12. cardio-vascular diseases (Yes/No)
13. ocular antihistamine (Yes/No)
14. hypertension (Yes/No)
15. osteoporosis (Yes/No)
16. number of consultations with a physiotherapist
17. consultations with a physiotherapist (Yes/No)
18. depression (Yes/No)
19. psychiatric illness (Yes/No)
20. number of emergency room visits
21. hospitalization (Yes/No)
22. number of consultations with a nurse
23. emergency room visits (Yes/No)
24. number of hospitalizations
25. nasal antihistamine (Yes/No)
26. cataract (Yes/No)
27. nasal polyposis (Yes/No)
28. number of hospital consultations
29. gastroesophageal reflux (Yes/No)
30. dyslipidemia (Yes/No)
31. arrhythmia (Yes/No)
32. hospital consultations (Yes/No)
33. cerebrovascular diseases (Yes/No)
34. anxiety (Yes/No)
35. rhinosinusitis (Yes/No)
36. heart failure (Yes/No)
37. diabetes (Yes/No)
38. coronary heart disease (Yes/No)
39. sex
40. psychotic disorders (Yes/No)
41. outpatient consultation (Yes/No)
42. topical immunosuppressant (Yes/No)
43. CMU (Yes/No)
44. myocardial infarction (Yes/No)
45. atopic dermatitis (Yes/No)

**TABLE S1. Quality of direct matching between cohort of patients with uncontrolled severe asthma and general population**

| <i>Matching variables</i>   | <i>Before Matching</i>                           |                                       |                                      | <i>After Matching</i>                            |                                     |                                       |
|-----------------------------|--------------------------------------------------|---------------------------------------|--------------------------------------|--------------------------------------------------|-------------------------------------|---------------------------------------|
|                             | <b>Uncontrolled severe asthma cohort (n=739)</b> | <b>General population (n=466,977)</b> | <b>Standardized mean differences</b> | <b>Uncontrolled severe asthma cohort (n=739)</b> | <b>General population (n=2,217)</b> | <b>Standardized mean differences*</b> |
| Age (mean, SD)              | 62.0 (16.7)                                      | 48.5 (20.2)                           | 0.7297                               | 62.0 (16.7)                                      | 62.0 (16.7)                         | 0.0000                                |
| Sex                         |                                                  |                                       |                                      |                                                  |                                     |                                       |
| Male (n, %)                 | 318 (43.0%)                                      | 228 841 (49.0%)                       | 0.1201                               | 318 (43.0%)                                      | 954 (43.0%)                         | 0.0000                                |
| Female (n, %)               | 421 (57.0%)                                      | 238 136 (51.0%)                       |                                      | 421 (57.0%)                                      | 1 263 (57.0%)                       |                                       |
| Beneficiary of CMU-c (n, %) | 74 (10.0%)                                       | 31 778 (6.8%)                         | 0.1158                               | 74 (10.0%)                                       | 222 (10.0%)                         | 0.0000                                |

\* A standardized mean difference < 0,1 after matching is considered as acceptable.

**TABLE S2. Quality of propensity score matching between cohort of patients with uncontrolled severe asthma and cohort of patients with asthma**

| Matching variables              | Before Matching                           |                          |                               | After Matching                            |                       |                                |
|---------------------------------|-------------------------------------------|--------------------------|-------------------------------|-------------------------------------------|-----------------------|--------------------------------|
|                                 | Uncontrolled severe asthma cohort (n=739) | Asthma cohort (n=15,849) | Standardized mean differences | Uncontrolled severe asthma cohort (n=739) | Asthma cohort (n=739) | Standardized mean differences* |
| Age (mean, SD)                  | 62.0 (16.7)                               | 54.8 (20.9)              | 0.3826                        | 62.0 (16.7)                               | 63.2 (17.2)           | -0.0688                        |
| Sex                             |                                           |                          |                               |                                           |                       |                                |
| Male (n, %)                     | 318 (43.0%)                               | 7 010 (44.2%)            | 0.0242                        | 318 (43.0%)                               | 347 (47.0%)           | 0.0789                         |
| Female (n, %)                   | 421 (57.0%)                               | 8 839 (55.8%)            |                               | 421 (57.0%)                               | 392 (53.0%)           |                                |
| Beneficiary of CMU-c (n, %)     | 74 (10.0%)                                | 1 536 (9.7%)             | 0.0108                        | 74 (10.0%)                                | 57 (7.7%)             | 0.0810                         |
| Cardiovascular diseases (n, %)  | 405 (54.8%)                               | 6 863 (43.3%)            | 0.2316                        | 405 (54.8%)                               | 431 (58.3%)           | -0.0710                        |
| Coronary heart disease (n, %)   | 55 (7.4%)                                 | 1 036 (6.5%)             | 0.0355                        | 55 (7.4%)                                 | 69 (9.3%)             | -0.0684                        |
| Myocardial infarction (n, %)    | 8 (1.1%)                                  | 179 (1.1%)               | -0.0045                       | 8 (1.1%)                                  | 8 (1.1%)              | 0.0000                         |
| Arrhythmia (n, %)               | 60 (8.1%)                                 | 946 (6.0%)               | 0.0841                        | 60 (8.1%)                                 | 65 (8.8%)             | -0.0243                        |
| Heart failure (n, %)            | 33 (4.5%)                                 | 527 (3.3%)               | 0.0590                        | 33 (4.5%)                                 | 49 (6.6%)             | -0.0947                        |
| Hypertension (n, %)             | 364 (49.3%)                               | 6 178 (39.0%)            | 0.2081                        | 364 (49.3%)                               | 375 (50.7%)           | -0.0298                        |
| Cerebrovascular diseases (n, %) | 27 (3.7%)                                 | 411 (2.6%)               | 0.0610                        | 27 (3.7%)                                 | 29 (3.9%)             | -0.0142                        |
| Dyslipidemia (n, %)             | 237 (32.1%)                               | 4 439 (28.0%)            | 0.0887                        | 237 (32.1%)                               | 268 (36.3%)           | -0.0885                        |
| Diabetes (n, %)                 | 108 (14.6%)                               | 2 047 (12.9%)            | 0.0493                        | 108 (14.6%)                               | 112 (15.2%)           | -0.0152                        |
| Osteoporosis (n, %)             | 110 (14.9%)                               | 1 325 (8.4%)             | 0.2046                        | 110 (14.9%)                               | 112 (15.2%)           | -0.0076                        |
| Psychiatric illness** (n, %)    | 224 (30.3%)                               | 3 671 (23.2%)            | 0.1621                        | 224 (30.3%)                               | 223 (30.2%)           | 0.0029                         |
| Cataract (n, %)                 | 75 (10.1%)                                | 1 049 (6.6%)             | 0.1276                        | 75 (10.1%)                                | 69 (9.3%)             | 0.0274                         |
| Rhinosinusitis (n, %)           | 3 (0.4%)                                  | 17 (0.1%)                | 0.0591                        | 3 (0.4%)                                  | 2 (0.3%)              | 0.0233                         |
| Gastroesophageal reflux (n, %)  | 79 (10.7%)                                | 1 261 (8.0%)             | 0.0941                        | 79 (10.7%)                                | 69 (9.3%)             | 0.0451                         |
| Atopic dermatitis (n, %)        | 1 (0.1%)                                  | 22 (0.1%)                | -0.0009                       | 1 (0.1%)                                  | 0 (0.0%)              | 0.0521                         |
| Nasal polyposis (n, %)          | 14 (1.9%)                                 | 91 (0.6%)                | 0.1198                        | 14 (1.9%)                                 | 5 (0.7%)              | 0.1083                         |
| Nasal antihistamine (n, %)      | 1 (0.1%)                                  | 197 (1.2%)               | -0.1342                       | 1 (0.1%)                                  | 3 (0.4%)              | -0.0521                        |
| Ocular antihistamine (n, %)     | 4 (0.5%)                                  | 589 (3.7%)               | -0.2213                       | 4 (0.5%)                                  | 6 (0.8%)              | -0.0330                        |
| Systemic antihistamine (n, %)   | 65 (8.8%)                                 | 7 892 (49.8%)            | -1.0090                       | 65 (8.8%)                                 | 75 (10.1%)            | -0.0462                        |
| Nasal corticosteroid (n, %)     | 10 (1.4%)                                 | 6 597 (41.6%)            | -1.1249                       | 10 (1.4%)                                 | 15 (2.0%)             | -0.0525                        |

|                                                           |              |                |         |              |              |         |
|-----------------------------------------------------------|--------------|----------------|---------|--------------|--------------|---------|
| Non-steroidal anti-inflammatory drugs (n, %)              | 70 (9.5%)    | 7 756 (48.9%)  | -0.9634 | 70 (9.5%)    | 73 (9.9%)    | -0.0137 |
| Antibiotic (n, %)                                         | 170 (23.0%)  | 10 249 (64.7%) | -0.9251 | 170 (23.0%)  | 184 (24.9%)  | -0.0444 |
| Proton pump inhibitor (n, %)                              | 122 (16.5%)  | 6 776 (42.8%)  | -0.6001 | 122 (16.5%)  | 132 (17.9%)  | -0.0359 |
| Psychotropic drug (n, %)                                  | 128 (17.3%)  | 6 091 (38.4%)  | -0.4844 | 128 (17.3%)  | 172 (23.3%)  | -0.1484 |
| Dermocorticoids (n, %)                                    | 19 (2.6%)    | 3 321 (21.0%)  | -0.5954 | 19 (2.6%)    | 25 (3.4%)    | -0.0478 |
| Topical immunosuppressant (n, %)                          | 1 (0.1%)     | 31 (0.2%)      | -0.0148 | 1 (0.1%)     | 0 (0.0%)     | 0.0521  |
| Outpatient consultation (n, %)                            | 656 (88.8%)  | 14 159 (89.3%) | -0.0182 | 656 (88.8%)  | 668 (90.4%)  | -0.0532 |
| Hospital consultation (n, %)                              | 193 (26.1%)  | 3 685 (23.3%)  | 0.0665  | 193 (26.1%)  | 171 (23.1%)  | 0.0691  |
| Consultation with a nurse (n, %)                          | 551 (74.6%)  | 9 941 (62.7%)  | 0.2572  | 551 (74.6%)  | 548 (74.2%)  | 0.0093  |
| Consultation with a physiotherapist (n, %)                | 383 (51.8%)  | 6 754 (42.6%)  | 0.1853  | 383 (51.8%)  | 363 (49.1%)  | 0.0541  |
| Hospitalization (n, %)                                    | 468 (63.3%)  | 8 834 (55.7%)  | 0.1551  | 468 (63.3%)  | 475 (64.3%)  | -0.0197 |
| Emergency room visits (n, %)                              | 356 (48.2%)  | 6 442 (40.6%)  | 0.1519  | 356 (48.2%)  | 349 (47.2%)  | 0.0190  |
| Number of outpatient consultations (mean, SD)             | 36.9 (30.0)  | 29.2 (25.9)    | 0.2724  | 36.9 (30.0)  | 33.7 (26.7)  | 0.1128  |
| Number of hospital consultations (mean, SD)               | 3.4 (10.2)   | 2.4 (7.9)      | 0.1094  | 3.4 (10.2)   | 3.3 (10.0)   | 0.0175  |
| Number of consultations with a nurse (mean, SD)           | 53.5 (195.3) | 27.9 (132.7)   | 0.1535  | 53.5 (195.3) | 41.6 (162.1) | 0.0665  |
| Number of consultations with a physiotherapist (mean, SD) | 37.0 (98.8)  | 21.1 (62.3)    | 0.1935  | 37.0 (98.8)  | 34.1 (104.0) | 0.0286  |
| Number of hospitalizations (mean, SD)                     | 2.3 (5.0)    | 1.6 (4.0)      | 0.1514  | 2.3 (5.0)    | 2.4 (5.0)    | -0.0057 |
| Number of emergency room visits (mean, SD)                | 1.2 (2.2)    | 0.9 (1.9)      | 0.1606  | 1.2 (2.2)    | 1.2 (1.9)    | 0.0340  |
| Charlson's score (mean, SD)                               | 3.6 (2.3)    | 3.0 (2.3)      | 0.2588  | 3.6 (2.3)    | 3.8 (2.4)    | -0.0702 |

\* A standardized mean difference < 0,1 after matching is considered as acceptable.

\*\*Psychiatric illness includes depression, anxiety, and psychotic disorders.

**FIGURE S2. Quality of propensity score matching between cohort of patients with uncontrolled severe asthma and cohort of patients with asthma**

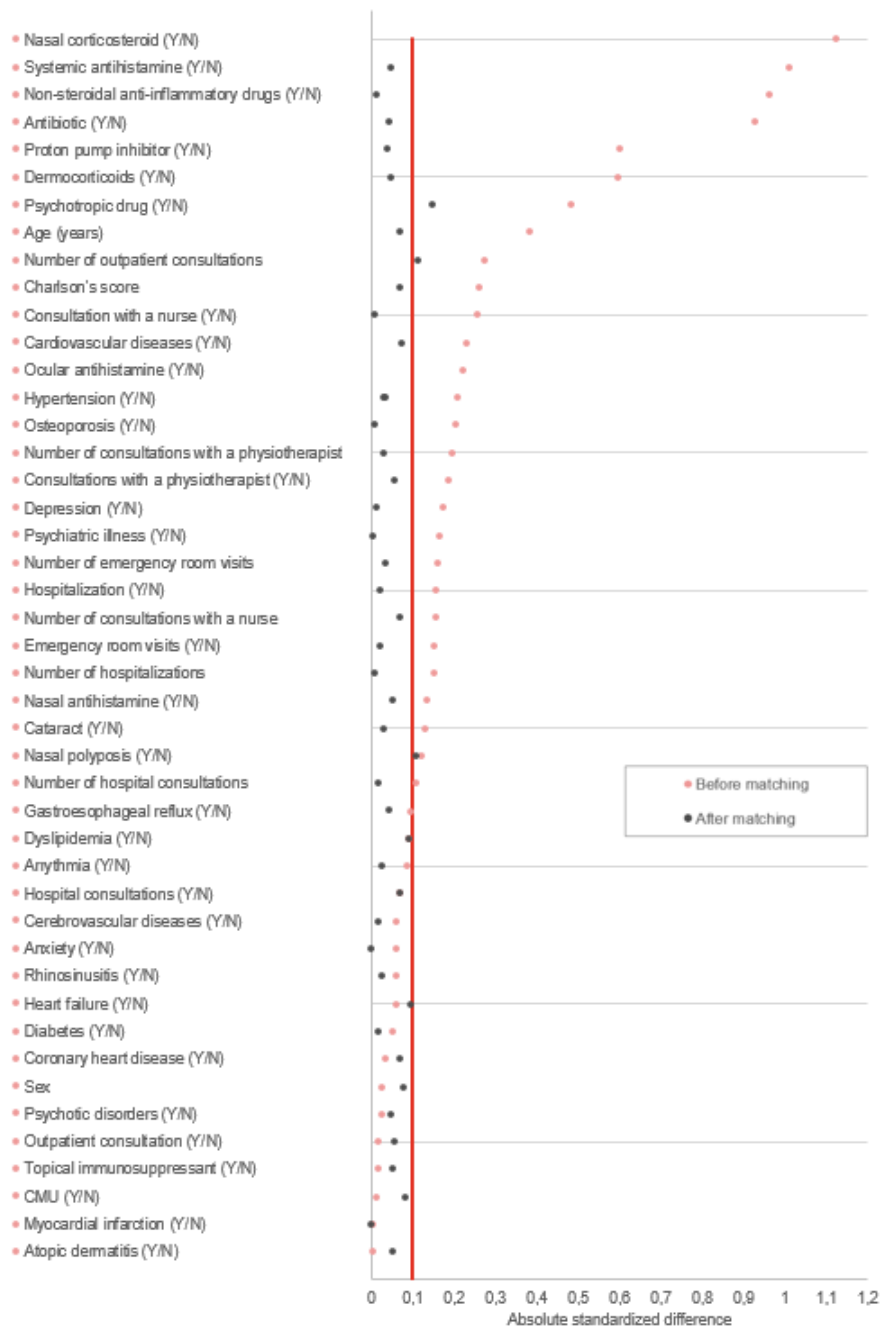

A standardized mean difference < 0,1 after matching is considered as acceptable.

FIGURE S3. Analysis of mortality by age group

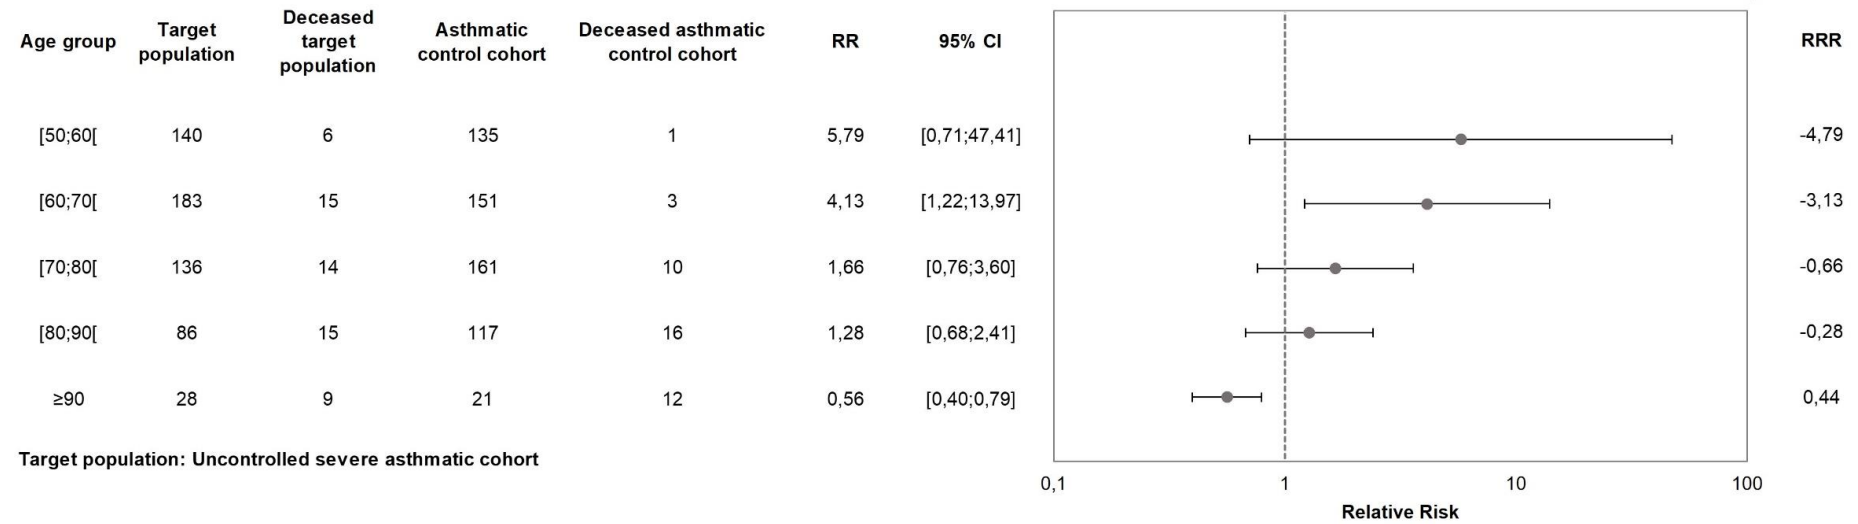



**Table S3. Results of multivariate Cox model on mortality**

| Covariate                                                                                                            | Hazard ratio | 95% CI      |
|----------------------------------------------------------------------------------------------------------------------|--------------|-------------|
| Age (1-year increase)                                                                                                | 1.07         | 1.05 - 1.09 |
| History of cardiovascular diseases (with vs. without)                                                                | 1.91         | 1.18 - 3.09 |
| History of diabetes (with vs. without)                                                                               | 1.66         | 1.11 - 2.49 |
| History of cancer (with vs. without)                                                                                 | 2.40         | 1.64 - 3.50 |
| Patients with uncontrolled severe asthma vs. general population in population with history of psychiatric disease    | 1.22         | 0.66 - 2.26 |
| Patients with uncontrolled severe asthma vs. general population in population without history of psychiatric disease | 3.25         | 2.14 - 4.92 |
| History of psychiatric disease (with vs. without) in uncontrolled severe asthma cohort                               | 0.93         | 0.52 - 1.65 |
| History of psychiatric disease (with vs. without) in general population cohort                                       | 2.46         | 1.54 - 3.92 |

Key: CI – confidence interval.

**FIGURE S4. 24-month survival for the uncontrolled severe asthmatic cohort versus general population among subjects without history of psychiatric disease**

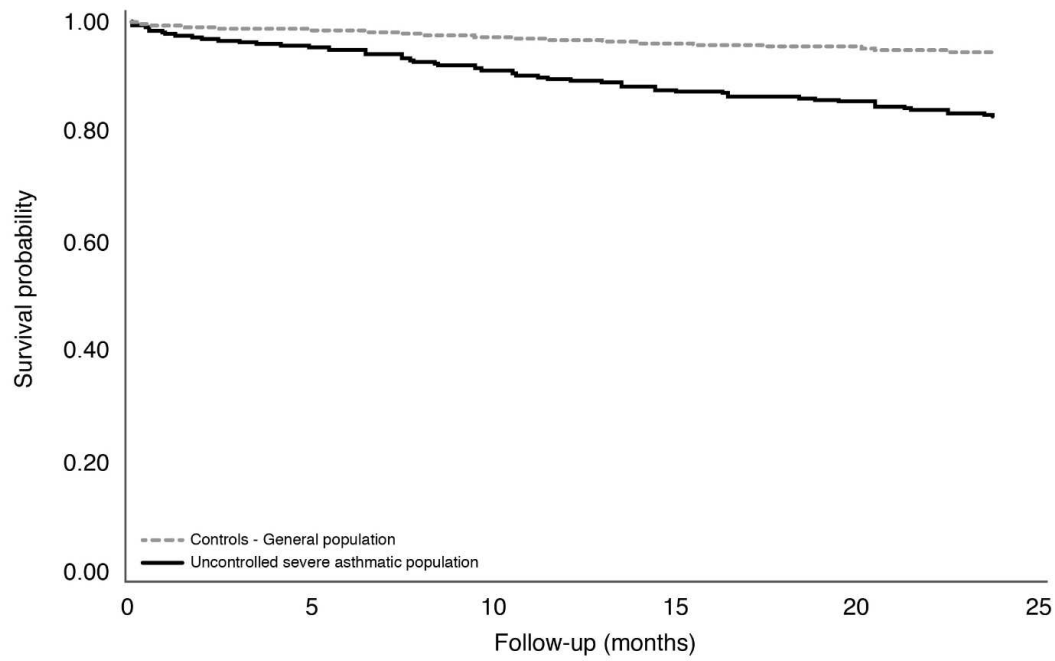

Supplement: bmjopen-2021-060160supp001.pdf [file bmjopen-2021-060160supp001.pdf]
