# Supplementary material for: Real-life impact of uncontrolled severe asthma on mortality and healthcare use in adolescents and adults: findings from the retrospective, observational RESONANCE study in France
Source: PubMed Central journal article supplement — BMJ Open. 2022 Aug 24;12(8):e060160. doi: 10.1136/bmjopen-2021-060160 (PMC9413284; doi:10.1136/bmjopen-2021-060160), 2022-08-24
Supplement: bmjopen-2021-060160.draft_revisions.pdf [file bmjopen-2021-060160.draft_revisions.pdf]

# BMJ Open

BMJ Open is committed to open peer review. As part of this commitment we make the peer review history of every article we publish publicly available.

When an article is published we post the peer reviewers' comments and the authors' responses online. We also post the versions of the paper that were used during peer review. These are the versions that the peer review comments apply to.

The versions of the paper that follow are the versions that were submitted during the peer review process. They are not the versions of record or the final published versions. They should not be cited or distributed as the published version of this manuscript.

BMJ Open is an open access journal and the full, final, typeset and author-corrected version of record of the manuscript is available on our site with no access controls, subscription charges or pay-per-view fees (<http://bmjopen.bmj.com>).

If you have any questions on BMJ Open's open peer review process please email [info.bmjopen@bmj.com](mailto:info.bmjopen@bmj.com)

# BMJ Open

## Real-life impact of uncontrolled severe asthma on mortality and healthcare use in adolescents and adults: the RESONANCE study

|                               |                                                                                                                                                                                                                                                                                                                                                                                                                                                                                                                                                                                                                                                                                                                                                                                                                                                                                             |
|-------------------------------|---------------------------------------------------------------------------------------------------------------------------------------------------------------------------------------------------------------------------------------------------------------------------------------------------------------------------------------------------------------------------------------------------------------------------------------------------------------------------------------------------------------------------------------------------------------------------------------------------------------------------------------------------------------------------------------------------------------------------------------------------------------------------------------------------------------------------------------------------------------------------------------------|
| Journal:                      | <i>BMJ Open</i>                                                                                                                                                                                                                                                                                                                                                                                                                                                                                                                                                                                                                                                                                                                                                                                                                                                                             |
| Manuscript ID                 | bmjopen-2021-060160                                                                                                                                                                                                                                                                                                                                                                                                                                                                                                                                                                                                                                                                                                                                                                                                                                                                         |
| Article Type:                 | Original research                                                                                                                                                                                                                                                                                                                                                                                                                                                                                                                                                                                                                                                                                                                                                                                                                                                                           |
| Date Submitted by the Author: | 06-Jan-2022                                                                                                                                                                                                                                                                                                                                                                                                                                                                                                                                                                                                                                                                                                                                                                                                                                                                                 |
| Complete List of Authors:     | Roche, Nicolas; Assistance Publique - Hopitaux de Paris, Pneumologie, Hôpital Cochin. Centre - Université de Paris, UMR 1016, Institut Cochin<br>Garcia, Gilles; Assistance Publique - Hopitaux de Paris, Université Paris-Sud, Université Paris-Saclay, Hôpital Bicêtre, Service de pneumologie de Larrard, Alexandre; stève consultants<br>Cancalon, Charlotte; stève consultants<br>Bénard, Stève; stève consultants<br>Perez, Vincent; Sanofi-Aventis France SA<br>Mahieu, Aymeric; Sanofi-Aventis France SA<br>Vieu, Laurine; Sanofi-Aventis France SA<br>Demoly, Pascal ; Centre Hospitalier Universitaire de Montpellier, Unité d'allergologie, département de pneumologie et addictologie, Hôpital Arnaud-de-Villeneuve, Université de Montpellier; Institut Desbrest d'Épidémiologie et de Santé Publique (IDESP) - UA11, UMR INSERM-Université de Montpellier, Campus Santé, IURC |
| Keywords:                     | Asthma < THORACIC MEDICINE, Epidemiology < THORACIC MEDICINE, HEALTH ECONOMICS                                                                                                                                                                                                                                                                                                                                                                                                                                                                                                                                                                                                                                                                                                                                                                                                              |
|                               |                                                                                                                                                                                                                                                                                                                                                                                                                                                                                                                                                                                                                                                                                                                                                                                                                                                                                             |

SCHOLARONE™  
Manuscripts

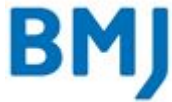

I, the Submitting Author has the right to grant and does grant on behalf of all authors of the Work (as defined in the below author licence), an exclusive licence and/or a non-exclusive licence for contributions from authors who are: i) UK Crown employees; ii) where BMJ has agreed a CC-BY licence shall apply, and/or iii) in accordance with the terms applicable for US Federal Government officers or employees acting as part of their official duties; on a worldwide, perpetual, irrevocable, royalty-free basis to BMJ Publishing Group Ltd ("BMJ") its licensees and where the relevant Journal is co-owned by BMJ to the co-owners of the Journal, to publish the Work in this journal and any other BMJ products and to exploit all rights, as set out in our [licence](#).

The Submitting Author accepts and understands that any supply made under these terms is made by BMJ to the Submitting Author unless you are acting as an employee on behalf of your employer or a postgraduate student of an affiliated institution which is paying any applicable article publishing charge ("APC") for Open Access articles. Where the Submitting Author wishes to make the Work available on an Open Access basis (and intends to pay the relevant APC), the terms of reuse of such Open Access shall be governed by a Creative Commons licence – details of these licences and which [Creative Commons](#) licence will apply to this Work are set out in our licence referred to above.

Other than as permitted in any relevant BMJ Author's Self Archiving Policies, I confirm this Work has not been accepted for publication elsewhere, is not being considered for publication elsewhere and does not duplicate material already published. I confirm all authors consent to publication of this Work and authorise the granting of this licence.

1  
2  
3  
4 **Word Count:** 3,091 words

5  
6 **Real-life impact of uncontrolled severe asthma on mortality and healthcare use in**  
7 **adolescents and adults: the RESONANCE study**  
8  
9

10  
11 Nicolas Roche, MD<sup>1</sup>, Gilles Garcia, MD<sup>2</sup>, Alexandre de Larrard, PharmD<sup>3</sup>, Charlotte Cancalon,  
12 MSc<sup>3</sup>, Stève Bénard, PharmD<sup>3</sup>, Vincent Perez, MD<sup>4</sup>, Aymeric Mahieu, PharmD<sup>4</sup>, Laurine Vieu,  
13 PharmD<sup>4</sup>, Pascal Demoly, MD<sup>5</sup>  
14  
15

16  
17  
18 <sup>1</sup> Pneumologie, Hôpital Cochin, APHP. Centre - Université de Paris, UMR 1016, Institut  
19 Cochin, 27 rue du Fbg St Jacques, 75014 Paris, France.

20  
21 <sup>2</sup> Assistance Publique-Hôpitaux de Paris, Université Paris-Sud, Université Paris-Saclay,  
22 Hôpital Bicêtre, Service de pneumologie, 78, rue du Général-Leclerc, 94270 Le Kremlin-  
23 Bicêtre, France.  
24  
25

26  
27 <sup>3</sup> stève consultants, Oullins, France.

28  
29 <sup>4</sup> Sanofi-Aventis France, Gentilly, France.

30  
31 <sup>5</sup> Unité d'allergologie, département de pneumologie et addictologie, Hôpital Arnaud-de-  
32 Villeneuve, Université de Montpellier, CHU de Montpellier, 371, avenue du Doyen Gaston  
33 Giraud, 34090 Montpellier, France; Institut Desbrest d'Épidémiologie et de Santé Publique  
34 (IDESP) - UA11, UMR INSERM-Université de Montpellier, Campus Santé, IURC, 641 avenue  
35 du Doyen Gaston Giraud, 34093 Montpellier Cedex 5, France.  
36  
37  
38  
39  
40

41 **Corresponding author:**

42  
43 Nicolas Roche

44  
45 Pneumologie, Hôpital Cochin, AP-HP. Centre - Université de Paris (Descartes), UMR 1016,  
46 Institut Cochin  
47

48  
49 27 rue du Fbg St Jacques, 75014 Paris, France

50  
51 T: +33 158 41 21 53

52  
53 E: [nicolas.roche@aphp.fr](mailto:nicolas.roche@aphp.fr)  
54  
55  
56  
57  
58  
59  
60

## ABSTRACT

**Word Count: 300**

**Objective:** To characterize uncontrolled severe asthma and compare the disease burden with the general and asthmatic populations.

**Design:** Retrospective observational study using a national sample of a French healthcare database (*Echantillon Généraliste des Bénéficiaires [EGB]*).

**Setting:** The EGB, an anonymized permanent sample of health insurance databases, representing 1/97<sup>th</sup> of the French population.

**Participants:** Patients ( $\geq 12$  years) were selected in year 2014 and followed 2 years. A cohort of patients with uncontrolled severe asthma was defined using an algorithm based on peer-reviewed literature and Global Initiative for Asthma recommendations. Index date was the occurrence of the first marker of uncontrolled asthma. This cohort was matched with 2 control cohorts (general population and asthmatic controls) on baseline characteristics-based propensity scores.

**Main outcomes measures:** Mortality, healthcare use, and associated costs were studied in the 2 years of follow-up.

**Results:** Among 467,716 individuals in the EGB, 16,588 asthmatics were identified, including 739 (4.5%) with uncontrolled severe disease. The survival probability at 2 years for patients with uncontrolled severe asthma (92.0%) was lower than in the general population cohort (96.6%; relative risk of death: 2.35; 95% confidence interval: 1.70-3.29;  $P < 0.0001$ ) and tended to be lower than in the control asthmatic cohort (94.3%;  $P = 0.07$ ). Emergency department visits and hospitalizations were higher in patients with uncontrolled severe asthma than in the general population (64.7% vs 34.9%;  $P < 0.0001$ ) and asthmatic controls (64.7% vs 55.2%;  $P = 0.0002$ ). Other components of healthcare use (medical and paramedical visits, medications) were increased in patients with uncontrolled severe asthma compared with

1  
2  
3 control populations. These increases translated into higher costs ( $P<0.0001$  for both  
4 comparisons).  
5  
6

7  
8 **Conclusions:** This study demonstrates the huge burden of uncontrolled severe asthma in  
9 terms of mortality, morbidity, and healthcare resource consumption compared to other patients  
10 with asthma and the general population, and emphasizes the importance of appropriate  
11 management in this high-risk population.  
12  
13  
14  
15  
16  
17  
18  
19  
20  
21  
22  
23  
24  
25  
26  
27  
28  
29  
30  
31  
32  
33  
34  
35  
36  
37  
38  
39  
40  
41  
42  
43  
44  
45  
46  
47  
48  
49  
50  
51  
52  
53  
54  
55  
56  
57  
58  
59  
60

For peer review only

**Strengths and limitations of this study:**

- The study was conducted using a well-recognized and robust populational medical administrative database that confers many advantages, such as the completeness of mortality data and comprehensiveness of healthcare reimbursed for all patients.
- This is the first study to specifically compare uncontrolled severe asthmatic patients with the overall asthmatic population.
- Comparability of studied groups was ensured by careful matching process.
- The lack of clinical data was mitigated by the use of a comprehensive algorithm to identify the uncontrolled severe asthmatic population with great care in the definitions of asthma, severity, and control to ensure the accuracy of the cohorts.
- The criteria requiring continuous insurance coverage may have resulted in a marginally lower number of younger patients being included due to student-specific insurance offered during school years.

## INTRODUCTION

Asthma is one of the most common chronic diseases and is a major cause of morbidity. This heterogeneous disease is characterized by its chronic inflammatory nature which can lead to airway remodeling and presents with varied levels of severity and control. While a majority of asthma patients have mild to moderate disease according to Global Initiative for Asthma (GINA) criteria, between 3% and 10% present a severe asthma, which may be life-threatening, particularly due to severe and potentially fatal exacerbations.[1,2] Despite implementation of an optimal management strategy, many patients with severe asthma are not able to achieve disease control, leading to poor quality of life and significant social and health burdens. Asthma therefore represents an important public health issue given its impact on work productivity (ie, absenteeism and presenteeism) and the costs associated with disease management and healthcare resource utilization.[3–7]

In the context of the rapidly evolving landscape of expensive GINA step 5 asthma treatments, it is crucial to generate up-to-date data on the real-life population burden of uncontrolled severe asthma in adolescents and adults and to understand the relative impact of the disease on severe asthma patients compared to the general and to non-severe asthmatic populations. The framework of the French Health Data Hub project provided the opportunity to access the public medico-administrative database to address this specific issue.

The RESONANCE study was undertaken to: (1) characterize uncontrolled severe asthma in patients aged 12 years and older, and (2) compare the disease burden in terms of mortality, healthcare utilization, and associated costs within this population to two series of matched controls from the general population and the asthmatic population (ie total asthmatic population excluding those with uncontrolled severe asthma).



## METHODS

### Study Design

A retrospective, non-interventional cohort study was carried out using a large populational database from France, the *Echantillon Généraliste des Bénéficiaires* (EGB). All individuals aged 12 years and over in the EGB were included in the source population. A cohort of adolescent and adult patients who had uncontrolled severe asthma during 2014 were identified. Their index date was the date of the first event identifying non-control during 2014. Two control cohorts were defined, one from the general population and another of patients with asthma. For each control selected, the index date assigned was the calendar index date of respective matched patients from the uncontrolled severe asthma cohort.

Historical information on comorbidities, healthcare use, and treatments received were collected in the 5 years preceding the index date to assess baseline characteristics. Cohorts were followed for 2 years after the index date to assess the outcomes of interest (Figure 1).

### Data sources

The EGB is an anonymized permanent sample of health insurance databases representing 1/97th of the entire French population.[8,9] Given the universal healthcare system in France, the EGB is a sizeable and representative sample of all subjects covered by various social security schemes and now includes nearly 660,000 beneficiaries.

The EGB contains information on demographics (age, sex, area of residence, etc.); outpatient care reimbursement (including drug dispensing); medical care and reimbursement received in outpatient and hospital settings; specific information on the right to universal supplementary health coverage (CMU-c); whether beneficiaries are affected by a long-term condition (*affection de longue durée*; ALD); and the date of death. The database benefits from the interlinkage of several administrative data sources, thereby allowing an assessment of beneficiaries' healthcare utilization over time.

## Subjects

Patients with uncontrolled severe asthma were identified using an algorithm based on events occurring in 2014 (Figure S1, Supplementary File). This algorithm was designed following a literature review,[10–12] and GINA management recommendations,[13] in collaboration with an expert scientific committee composed of 3 respiratory specialists.

Patients with evidence of chronic obstructive pulmonary disease (COPD), identified through International Classification of Diseases, 10th Revision (ICD-10) or ALD codes, were excluded (see Supplementary File).

General population controls were randomly selected among all individuals, besides uncontrolled severe asthmatics, present in the EGB in 2014. Controls were eligible to be matched with patients in the uncontrolled severe asthma cohort if they had the same age, sex, and CMU-c status at index date. Up to 3 controls per case were selected. Matching quality was assessed by comparing standardized differences between both cohorts.

Individuals in this control cohort were randomly selected within the total asthmatic population present in the EGB in 2014, excluding those with uncontrolled severe asthma. Individuals were matched with uncontrolled severe asthmatics on a 1:1 ratio using propensity scores incorporating 45 variables recommended by the expert scientific committee, including sociodemographic characteristics, comorbidities, and healthcare history prior to index date. Standardized differences were used to assess matching quality.

## Collected data and outcomes

The following sociodemographic and clinical characteristics were considered:

- In the 5 years prior to index date: comorbidities, treatments received, healthcare utilization (medical visits, emergency department [ED] visits, hospitalizations)
- At index date: age, sex, CMU-c status
- During follow-up:

- Date of death, if applicable
- Drugs of interest: Asthma treatments and other classes of interest (see Supplementary File)
- Healthcare utilization: Medical and paramedical visits (general medicine, respiratory specialists, otolaryngology, nursing support, physiotherapy), ED visits, and hospitalizations (all-cause and asthma-related)
- Direct medical costs associated with medications and healthcare use (outpatient and hospital settings)

The primary objective of this study was to assess the number and proportion of uncontrolled severe asthmatic patients aged 12 and older. Sociodemographic and clinical characteristics were provided for this population.

The secondary objective was to assess mortality and survival probability, healthcare use and associated costs in the 2 years after index date in the uncontrolled severe asthma cohort compared to the two matched control cohorts (general population and asthmatic controls).

### **Statistical analyses**

Continuous variables were described using means, standard deviations, medians, and ranges, whilst categorical variables were described as frequencies and 95% confidence intervals (95% CIs).

Crude cumulative all-cause mortality rates at 2 years were obtained for all cohorts using the Kaplan-Meier methodology, whereby the probability of survival from index date through follow-up was estimated. The comparative analyses of mortality, healthcare utilization, and associated costs between the primary cohort and matched controls were conducted using Student's *t*-tests or Mann-Whitney tests for quantitative variables according to their distribution and chi-square tests for qualitative variables. A post-hoc analysis using a Cox regression model was built to compare mortality between the uncontrolled severe asthmatic cohort and general population. The final model included the following variables: population (uncontrolled

1  
2  
3 severe asthmatic cohort vs general population), age, history of cardiovascular disease,  
4 diabetes, psychiatric disease, and cancer comorbidity per the Charlson comorbidity index  
5 score. Interactions between the variable “population” and other covariates included in the  
6 model were tested. Costs were adjusted to 2018 Euros (€; date of data access). All analyses  
7 were performed using the SAS 9.4 software package (SAS Institute, Cary, NC, USA).  
8  
9  
10  
11  
12

### 13 14 15 **Ethical considerations**

16 The data considered as part of this study were anonymized to ensure confidentiality at the  
17 patient level. Data handling, processing, and analysis were carried out in alignment and with  
18 authorizations from an independent committee (*CEREES, Comité d'Expertise pour les*  
19 *Recherches, les Études et les Évaluations dans le domaine de la Santé*; favorable opinion on  
20 June 14, 2018; TPS 31996) and from the French National Data Protection Agency (*CNIL,*  
21 *Commission Nationale de l'Informatique et des Libertés*; Authorization DR-2018-097).  
22  
23  
24  
25  
26  
27  
28  
29

### 30 31 **Patient and Public Involvement Statement**

32 Patients and the public were not involved in the design, or conduct, or reporting, or  
33 dissemination plans of our research.  
34  
35  
36  
37  
38  
39  
40  
41  
42  
43  
44  
45  
46  
47  
48  
49  
50  
51  
52  
53  
54  
55  
56  
57  
58  
59  
60

## RESULTS

### Population selection

Of the 467,716 adolescents and adults present in the EGB, a total of 16,588 asthmatic patients were identified and 5,025 of these exhibited a marker of uncontrolled disease in 2014 (Figure S1). Among these, 739 uncontrolled severe asthmatic patients were identified (57% female; mean age: 62.0 years; 10.0% with CMU-c).

A total of 2,217 matched individuals were selected to build the control cohort from the general population. The control asthmatic population (all asthmatic patients excluding those with uncontrolled severe asthma) included 739 patients matched to uncontrolled severe asthmatic patients using propensity scores (53.0% women; mean age: 63.2 years; 7.7% with CMU-c, data not shown). The majority of the 45 variables defined for matching were successfully balanced (see Supplementary File).

### Mortality

In total, 59 uncontrolled severe asthmatic patients died in the 2-year follow-up period. The probability of survival at 2 years in this cohort was 92.0%, which is statistically significantly lower than that observed in the matched control cohort from the general population (96.6%; relative risk [RR] of death: 2.35; 95% CI: 1.70, 3.29;  $P<0.0001$ ). A significantly increased mortality was notably seen among those aged 50 to <60 years old (RR: 18.0; 95% CI: 2.2, 148.2) and those aged 60 to <70 years old (RR: 4.1; 95% CI: 1.9, 8.7). While the asthmatic control cohort had a numerically higher survival probability at 2 years than the uncontrolled severe asthmatic cohort, the difference was not significant (94.3% vs 92.0%;  $P=0.0747$ ). However, the analysis of mortality by age group showed a statistically significantly higher risk of mortality in patients aged 60 to <70 years (8% vs 2% deaths in uncontrolled severe asthmatic cohort vs asthmatic control cohort ; RR: 4.1; 95% CI: 1.2, 14.0; Figure S2, Supplementary File).

1  
2  
3 Figure 2 shows survival over time among the 3 cohorts. Compared with both control cohorts,  
4 the increased risk of mortality was observed early, and the difference increased during follow-  
5 up.  
6  
7  
8  
9

10 The Cox model for mortality risk showed a significant impact of a history of psychiatric  
11 diseases (Table S1, Supplementary File). In the category “without history of psychiatric  
12 diseases”, the mortality risk increased significantly by an average of 3.25 in the uncontrolled  
13 severe asthmatic cohort compared to the general population cohort (hazard ratio [HR]: 3.25;  
14 95% CI: 2.14, 4.92). Likewise, other comorbidities increased mortality risk in the uncontrolled  
15 severe asthmatic cohort, especially for cancer (HR: 2.40; 95% CI: 1.64, 3.50; Table S1).  
16  
17  
18  
19  
20  
21  
22  
23

24 Figure S3 shows that, among subjects without a history of psychiatric diseases, overall  
25 survival was lower in the uncontrolled severe asthmatic cohort compared to the general  
26 population, with a difference of 10% at 24 months.  
27  
28  
29  
30

### 31 **Healthcare utilization**

32 Table 1 shows the level of healthcare utilization for all 3 cohorts during follow-up. The  
33 proportion of patients requiring medical care in the hospital setting at least once during follow-  
34 up was significantly higher in the uncontrolled severe asthmatic population versus both control  
35 populations.  
36  
37  
38  
39  
40  
41  
42  
43  
44  
45  
46  
47  
48  
49  
50  
51  
52  
53  
54  
55  
56  
57  
58  
59  
60

**Table 1. Comparison of the results for mortality and main healthcare use per patient during the 2-year follow-up**

|                                                                                        | Cohort of uncontrolled severe asthmatics (N=739) | General population cohort (N=2,217) | P-Value            | Asthmatic control cohort (n=739) | P-Value            |
|----------------------------------------------------------------------------------------|--------------------------------------------------|-------------------------------------|--------------------|----------------------------------|--------------------|
| <b>Deaths, n (%)</b>                                                                   | <b>59 (8.0)</b>                                  | <b>75 (3.4)</b>                     | <b>P&lt;0.0001</b> | <b>42 (5.7)</b>                  | <b>P=0.0747</b>    |
| <b>Deaths by age group, n (%)</b>                                                      |                                                  |                                     |                    |                                  |                    |
| <20                                                                                    | 0 (0.0)                                          | 0 (0.0)                             | P=0.0393           | 0 (0.0)                          | P=0.0366           |
| 20-<30                                                                                 | 0 (0.0)                                          | 1 (1.3)                             |                    | 0 (0.0)                          |                    |
| 30-<40                                                                                 | 0 (0.0)                                          | 1 (1.3)                             |                    | 0 (0.0)                          |                    |
| 40-<50                                                                                 | 0 (0.0)                                          | 1 (1.3)                             |                    | 0 (0.0)                          |                    |
| 50-<60                                                                                 | 6 (10.2)                                         | 1 (1.3)                             |                    | 1 (2.4)                          |                    |
| 60-<70                                                                                 | 15 (25.4)                                        | 11 (14.7)                           |                    | 3 (7.1)                          |                    |
| 70-<80                                                                                 | 14 (23.7)                                        | 16 (21.3)                           |                    | 10 (23.8)                        |                    |
| 80-<90                                                                                 | 15 (25.4)                                        | 20 (26.7)                           |                    | 16 (38.1)                        |                    |
| ≥90                                                                                    | 9 (15.3)                                         | 24 (32.0)                           |                    | 12 (28.6)                        |                    |
| <b>Mean age at death (σ)</b>                                                           | <b>76.1 (12.5)</b>                               | <b>79.7 (14.5)</b>                  |                    | P=0.0266                         |                    |
| Min-max                                                                                | 51.0-102.0                                       | 25.0-100.0                          | 55.0-102.0         |                                  | P=0.0266           |
| <b>At least 1 medical care act done at hospital, n (%)</b>                             | <b>478 (64.7)</b>                                | <b>774 (34.9)</b>                   | <b>P&lt;0.0001</b> | <b>408 (55.2)</b>                | <b>P=0.0002</b>    |
| ED visit                                                                               | 318 (43.0)                                       | 465 (21.0)                          | P<0.0001           | 247 (33.4)                       | P=0.0002           |
| All-cause hospitalization                                                              | 409 (55.3)                                       | 556 (25.1)                          | P<0.0001           | 349 (47.2)                       | P=0.0023           |
| Asthma-related hospitalizations (asthma and severe exacerbation) <sup>a</sup>          | 27 (3.7)                                         | 0 (0.0)                             | NA                 | 12 (1.6)                         | P=0.0163           |
| Asthma-related hospitalizations with at least 1 visit in intensive care unit           | 3 (0.4)                                          | 0 (0.0)                             | NA                 | 1 (0.1)                          | 0.3173             |
| <b>At least 1 medical visit during follow-up, n (%)</b>                                | <b>708 (95.8)</b>                                | <b>1,995 (90.0)</b>                 | <b>P&lt;0.0001</b> | <b>709 (95.9)</b>                | <b>P=0.8981</b>    |
| General practitioner                                                                   | 602 (81.5)                                       | 1,628 (73.4)                        | P<0.0001           | 620 (83.9)                       | P=0.2185           |
| Respiratory specialist                                                                 | 94 (12.7)                                        | 53 (2.4)                            | P<0.0001           | 42 (5.7)                         | P<0.0001           |
| Ear-nose-throat specialist                                                             | 67 (9.1)                                         | 122 (5.5)                           | P<0.0001           | 37 (5.0)                         | P=0.0030           |
| <b>At least 1 paramedical visit during follow-up, n (%)</b>                            | <b>600 (81.2)</b>                                | <b>1,390 (62.7)</b>                 | <b>P&lt;0.0001</b> | <b>546 (73.9)</b>                | <b>P=0.0011</b>    |
| Nurse consultation                                                                     | 531 (71.9)                                       | 1,184 (53.4)                        | P<0.0001           | 496 (66.7)                       | P=0.0353           |
| Physiotherapy consultation                                                             | 320 (43.3)                                       | 673 (30.4)                          | P<0.0001           | 259 (35.0)                       | P=0.0013           |
| <b>At least 1 filled prescription for an asthma medication during follow-up, n (%)</b> | <b>726 (98.2)</b>                                | <b>257 (11.6)</b>                   | <b>P&lt;0.0001</b> | <b>638 (86.3)</b>                | <b>P&lt;0.0001</b> |
| Short-acting bronchodilator                                                            | 606 (82.0)                                       | 100 (4.5)                           | P<0.0001           | 396 (53.6)                       | P<0.0001           |
| Long-acting bronchodilator: LAMA/LABA                                                  | 316 (42.8)                                       | 53 (2.4)                            | P=0.0004           | 190 (25.7)                       | P<0.0001           |
| Long-acting bronchodilator: xanthines                                                  | 56 (7.6)                                         | 2 (0.1)                             | P<0.0001           | 10 (1.4)                         | P<0.0001           |
| Anti-inflammatory medication (ICS ± OCS)                                               | 506 (68.5)                                       | 115 (5.2)                           | P<0.0001           | 273 (36.9)                       | P<0.0001           |
| Anti-inflammatory medication (ICS ± OCS) and long-acting bronchodilator                | 626 (84.7)                                       | 128 (5.8)                           | P<0.0001           | 413 (55.9)                       | P<0.0001           |

|                                                                                                                                         | Cohort of uncontrolled severe asthmatics (N=739) | General population cohort (N=2,217) | P-Value                   | Asthmatic control cohort (n=739) | P-Value                   |
|-----------------------------------------------------------------------------------------------------------------------------------------|--------------------------------------------------|-------------------------------------|---------------------------|----------------------------------|---------------------------|
| At least 1 visit to a GP, respiratory specialist, or allergy specialist, followed within 10 days by a filled prescription of OCS, n (%) | 481 (65.1)                                       | 447 (20.2)                          | <i>P</i> <0.0001          | 229 (31.0)                       | <i>P</i> <0.0001          |
| At least 1 filled prescription of a medication of interest during follow-up, n (%)                                                      | <b>727 (98.4)</b>                                | <b>1,847 (83.3)</b>                 | <b><i>P</i>&lt;0.0001</b> | <b>678 (91.7)</b>                | <b><i>P</i>&lt;0.0001</b> |
| Intranasal antihistamines                                                                                                               | 22 (3.0)                                         | 13 (0.6)                            | <i>P</i> <0.0001          | 10 (1.4)                         | <i>P</i> =0.0339          |
| Ocular antihistamines                                                                                                                   | 43 (5.8)                                         | 80 (3.6)                            | <i>P</i> =0.0004          | 27 (3.7)                         | <i>P</i> =0.0523          |
| Systemic antihistamines                                                                                                                 | 488 (66.0)                                       | 675 (30.4)                          | <i>P</i> <0.0001          | 273 (36.9)                       | <i>P</i> <0.0001          |
| Intranasal corticosteroids                                                                                                              | 420 (56.8)                                       | 567 (25.6)                          | <i>P</i> <0.0001          | 230 (31.1)                       | <i>P</i> <0.0001          |
| Nonsteroidal anti-inflammatory drugs                                                                                                    | 407 (55.1)                                       | 1,083 (48.8)                        | <i>P</i> <0.0001          | 317 (42.9)                       | <i>P</i> <0.0001          |
| Antibiotics                                                                                                                             | 670 (90.7)                                       | 1,323 (59.7)                        | <i>P</i> <0.0001          | 501 (67.8)                       | <i>P</i> <0.0001          |
| Proton-pump inhibitors                                                                                                                  | 506 (68.5)                                       | 980 (44.2)                          | <i>P</i> <0.0001          | 348 (47.1)                       | <i>P</i> <0.0001          |
| Psychotropic drugs                                                                                                                      | 426 (57.6)                                       | 840 (37.9)                          | <i>P</i> <0.0001          | 320 (43.3)                       | <i>P</i> <0.0001          |
| Topical corticosteroids                                                                                                                 | 235 (31.8)                                       | 512 (23.1)                          | <i>P</i> <0.0001          | 145 (19.6)                       | <i>P</i> <0.0001          |
| Topical immunosuppressants                                                                                                              | 2 (0.3%)                                         | 1 (0.0)                             | <i>P</i> =0.0588          | 0 (0.0%)                         | NA                        |

<sup>a</sup> Excluding stays of less than 1 night (or Z codes).

Key: ED – emergency department; GP – general practitioner; ICS – inhaled corticosteroid; LABA – long-acting  $\beta$ 2-agonist; LAMA – long-acting muscarinic antagonist; NA – not applicable; OCS – oral corticosteroid.



1  
2  
3 A 2-fold increase in ED visits and all-cause or asthma-related hospitalizations was observed  
4 for uncontrolled severe asthmatic patients compared with the general population  
5 (64.7% vs 34.9%;  $P<0.0001$ ). These patients also had a statistically significant increased use  
6 of other main components of care, such as medical visits (95.8% vs 90.0%;  $P<0.0001$ ) and  
7 paramedical visits (81.2% vs 62.7%;  $P<0.0001$ ). A statistically significant increase was also  
8 seen for the healthcare utilization comparison with the asthmatic cohort, where uncontrolled  
9 severe asthmatic patients also had more ED visits and hospitalizations (64.7% vs 55.2%;  
10  $P=0.0002$ ) and paramedical visits (81.2% vs 73.9%;  $P=0.0011$ ).  
11  
12  
13  
14  
15  
16  
17  
18  
19  
20

21 For drug prescriptions, the proportion of patients receiving medications overall was higher in  
22 uncontrolled severe asthmatic patients compared to matched individuals from the general  
23 population cohort, both in terms of asthma-related treatments, inclusive of oral corticosteroid  
24 therapy (98.2% vs 11.6%;  $P<0.0001$ ), and other treatments, such as antibiotics, nonsteroidal  
25 anti-inflammatory drugs, and psychotropic drugs (98.4% vs 83.3%;  $P<0.0001$ ). Uncontrolled  
26 severe asthmatic patients also had significantly higher medication use than the asthmatic  
27 controls both for asthma-related treatments (98.2% vs 86.3%;  $P<0.0001$ ) and other  
28 medications (98.4% vs 91.7%;  $P<0.0001$ ).  
29  
30  
31  
32  
33  
34  
35  
36  
37  
38

### 39 **Costs**

40 Healthcare use increases translated into higher costs. Mean costs associated with healthcare  
41 utilization during the 2-year follow-up were significantly higher for uncontrolled severe  
42 asthmatic patients (€14,020) compared to the general population (€3,564;  $P<0.0001$ ) or  
43 asthmatic controls (€6,418;  $P<0.0001$ ), regardless of the expenditure (Table 2).  
44  
45  
46  
47  
48  
49  
50  
51  
52  
53  
54  
55  
56  
57  
58  
59  
60

**Table 2. Comparison of costs (reimbursement amounts, in Euros) associated with hospital and outpatient use, per patient, over a 2-year period after the index date (uncontrolled severe asthmatic patients vs general population and asthmatic control cohorts)**

|                                  |                                   | <b>Cohort of uncontrolled severe asthmatics (N=739)</b> | <b>General population cohort (N=2,217)</b> | <b>P-Value</b>   | <b>Asthmatic control cohort (n=739)</b> | <b>P-Value</b>   |
|----------------------------------|-----------------------------------|---------------------------------------------------------|--------------------------------------------|------------------|-----------------------------------------|------------------|
| Hospitalization                  | Mean ( $\sigma$ )                 | 8,163 (20,669)                                          | 1,800 (7,991)                              | <i>P</i> <0.0001 | 3,589 (13,702)                          | <i>P</i> <0.0001 |
|                                  | Median                            | 425.91(0.00-5,854)                                      | 0.00 (0.00-0.00)                           |                  | 0.00 (0.00-1,284)                       |                  |
|                                  | Min-max                           | 0.00-246,483                                            | 0.00-176,423                               |                  | 0.00-190,456.80                         |                  |
| ED visit without hospitalization | Mean ( $\sigma$ )                 | 12.47 (27.74)                                           | 6.16 (17.76)                               | <i>P</i> <0.0001 | 9.40 (33.03)                            | <i>P</i> <0.0001 |
|                                  | Median (Q1-Q3)                    | 0.00 (0.00-24.86)                                       | 0.00 (0.00-0.00)                           |                  | 0.00 (0.00-0.00)                        |                  |
|                                  | Min-max                           | 0.00-319.21                                             | 0.00-273.42                                |                  | 0.00-671.13                             |                  |
| Medical visits                   | Mean ( $\sigma$ )                 | 643.02 (1,068)                                          | 367.57 (437.39)                            | <i>P</i> <0.0001 | 496.15 (657.70)                         | <i>P</i> <0.0001 |
|                                  | Median (Q1-Q3)                    | 491.39 (278.42-785.97)                                  | 265.02 (113.30-498.51)                     |                  | 376.35 (216.72-611.98)                  |                  |
|                                  | Min-max                           | 0.00-24,882                                             | 0.00-6,861                                 |                  | 0.00-11,547                             |                  |
| Laboratory tests                 | Mean ( $\sigma$ )                 | 240.95 (321.20)                                         | 153.74 (265.85)                            | <i>P</i> <0.0001 | 203.48 (285.37)                         | <i>P</i> =0.0131 |
|                                  | Median (Q1-Q3)                    | 145.14 (52.73-295.49)                                   | 85.23 (0.00-179.93)                        |                  | 126.25 (54.32-236.76)                   |                  |
|                                  | Min-max                           | 0.00-3,137                                              | 0.00-5,727                                 |                  | 0.00-2,461                              |                  |
| Paramedical visits               | Mean ( $\sigma$ )                 | 1,406 (4,827)                                           | 746.87 (2,986.03)                          | <i>P</i> <0.0001 | 968.41 (3,236.10)                       | <i>P</i> <0.0001 |
|                                  | Median (Q1-Q3)                    | 176.08 (11.98-689.00)                                   | 17.97 (0.00-288.02)                        |                  | 42.48 (0.00-468.70)                     |                  |
|                                  | Min-max                           | 0.00-65,527                                             | 0.00-50,060                                |                  | 0.00-36,145                             |                  |
| Medications                      | Mean ( $\sigma$ )                 | 3,076 (9,131.20)                                        | 199,49 (409,72)                            | <i>P</i> <0.0001 | 721.35 (747.43)                         | <i>P</i> <0.0001 |
|                                  | Median (Q1-Q3)                    | 1,525 (1,037-2,185)                                     | 58.38 (11,84-220,45)                       |                  | 523.35 (246.07-957.22)                  |                  |
|                                  | Min-max                           | 0.00-95,453                                             | 0.00-5,855                                 |                  | 0.00-9,472                              |                  |
| <b>Total costs</b>               | <b>Mean (<math>\sigma</math>)</b> | <b>14,020 (24,076)</b>                                  | <b>3,564 (9,540)</b>                       | <i>P</i> <0.0001 | <b>6,418 (15,109)</b>                   | <i>P</i> <0.0001 |
|                                  | <b>Median (Q1-Q3)</b>             | <b>4,624.70 (2,492-13,897)</b>                          | <b>824.75 (297.00-2,286)</b>               |                  | <b>1,904.82 (1,020-4,906)</b>           |                  |
|                                  | <b>Min-max</b>                    | <b>105.03-253,160</b>                                   | <b>0.00-190,380</b>                        |                  | <b>0.00-193,294</b>                     |                  |

Key: ED – emergency department.

1  
2  
3 The average cost of an uncontrolled severe asthmatic patient who died was significantly higher  
4 than that of a surviving patient (€28,009 vs €11,850.60;  $P<0.0001$ ). Primary drivers of this  
5 increase in uncontrolled severe asthmatic patients were hospitalizations (5-fold and 2-fold  
6 increases vs the general and asthmatic populations, respectively), drugs of interest (16-fold  
7 and 4-fold increases vs the general and asthmatic populations, respectively), and paramedical  
8 fees (2-fold and 1.4-fold increases vs the general and asthmatic populations, respectively).  
9  
10  
11  
12  
13  
14  
15  
16  
17  
18  
19  
20  
21  
22  
23  
24  
25  
26  
27  
28  
29  
30  
31  
32  
33  
34  
35  
36  
37  
38  
39  
40  
41  
42  
43  
44  
45  
46  
47  
48  
49  
50  
51  
52  
53  
54  
55  
56  
57  
58  
59  
60

For peer review only

## DISCUSSION

Given the lack of recent data quantifying impact of uncontrolled severe asthma on public health, the RESONANCE study provided important data characterizing this population and comparing it to the general and asthmatic populations in terms of morbidity and mortality as well as healthcare use and associated costs. This is the first study to specifically compare uncontrolled severe asthmatic patients with the overall asthmatic population.

The clinical burden of uncontrolled severe asthma was demonstrated through the increased risk of mortality, use of additional treatments (asthma-related treatment and other associated treatments), and hospitalizations during the 2-year follow-up period in comparison with matched patients from the general and asthmatic populations. The average costs of uncontrolled severe asthma to the healthcare system during the 2 years of follow-up represented nearly 4 times that of matched patients from the general population over the same period (difference of €10,456 per patient). This amounts to an increase of 293% in costs—more than twice that of matched asthmatic controls—in whom an increase of 118% in costs was seen over 2 years (difference of €7,601 per patient with the general population). Bourdin et al found an incremental cost of \$5,276 to the healthcare system annually when comparing severe asthmatic patients to the general population, although a 2-year extrapolation would be biased due to the non-annual rate of care seeking in the study population.[12] However, no specific assessment of uncontrolled severe asthma was performed.

Hospitalizations were the main driver of healthcare use and costs, in line with other studies assessing the economic burden of asthma.[4,7,14] Costs during follow-up could have been influenced by the cost of hospitalization occurring at index date, since it was part of the selection criteria, given its connection with asthma non-control; however, the influence of this phenomenon was limited, as only 5.1% of patients were selected based solely on this criterion.

An important finding highlighted by this study is that the cost of uncontrolled severe asthma was partly explained by healthcare received by patients who ended up by dying during follow-

1  
2  
3 up, emphasizing the importance of healthcare expenses during the last months or years of life  
4  
5 in this population.  
6  
7

8 Our study also assessed the size of the uncontrolled severe patient population. The 739  
9 patients identified among the total population of 16,588 asthmatic patients suggest that this  
10 small but high-risk population represents 4.5% of all asthmatic patients in France in 2014.  
11  
12 When extrapolating to the entire adolescent and adult French population, this represents a  
13 prevalence of 0.15% (i.e., 86,342 patients; 95% CI: 80,341, 92,789), which is slightly lower  
14 than other severe asthma populational estimates that used different definitions of asthma  
15 severity and did not account for asthma non-control.[12,15]  
16  
17  
18  
19  
20  
21  
22

23  
24 The uncontrolled severe asthmatic population was identified by means of a comprehensive  
25 algorithm, where great care was placed in the definitions of asthma, severity, and control to  
26 ensure the accuracy of the cohorts and palliate the lack of clinical data and use of a single  
27 marker, allowing identification of this unique population. Asthma was defined with robust data,  
28 such as asthma-related hospitalizations and complications, asthma-related full coverage for a  
29 long-term condition (ALD), and specific treatments.  
30  
31  
32  
33  
34  
35  
36  
37

38 Two cohorts were compared to uncontrolled severe asthmatic patients. The objective of the  
39 general population control cohort was to highlight the absolute burden of uncontrolled severe  
40 asthma in the population. Matching on key sociodemographic characteristics aimed to control  
41 for potential confounding bias and ensure comparability of the populations, which was  
42 confirmed by standardized differences. In addition, a Cox regression model was developed  
43 post-hoc to compare mortality risk between the uncontrolled severe asthmatic cohort and the  
44 general population; as expected, the 24-month survival was lower in the uncontrolled severe  
45 asthma cohort.  
46  
47  
48  
49  
50  
51  
52  
53

54  
55 The asthmatic control cohort was selected and matched to uncontrolled severe asthmatic  
56 patients using propensity scores to control potential confounding factors using all available  
57 and relevant variables. Given that this control population includes severe but controlled or  
58  
59  
60

1  
2  
3 non-controlled but non-severe asthmatics, it is not a population exclusively comprising low-  
4 risk patients.  
5  
6

7  
8 The study was conducted using the EGB, a well-recognized and robust populational medical  
9 administrative database that confers many advantages, such as the completeness of mortality  
10 data and comprehensiveness of healthcare reimbursed for all patients. Of note, the EGB does  
11 not include clinical information such as visit reason, diagnoses made outside hospitals,  
12 biological test results, or patients' anthropometric data.  
13  
14  
15  
16  
17

18  
19 The challenges associated with the use of administrative databases have been well  
20 documented;<sup>[16]</sup> in this study, the difficulties in selecting the population of uncontrolled severe  
21 asthmatics were associated with a potential for measurement bias related to coding errors in  
22 hospital diagnoses; this source of error is likely limited and non-differential between groups.  
23  
24 The algorithms assumed that filled prescriptions were proxies to treatment use; however, it is  
25 not possible to confirm that a filled prescription has been taken.  
26  
27  
28  
29  
30  
31

32  
33 Potential indications of asthma treatments for other conditions, such as COPD, were  
34 accounted for as part of patient selection by adding exclusion criteria. Despite this, some  
35 COPD patients also suffering from asthma may have been included given the average age of  
36 the asthmatic cohorts. It is anticipated that the criteria requiring continuous insurance  
37 coverage may have resulted in a lower number of younger patients being included due to  
38 student-specific insurance offered during school years; however, the impact of this limitation  
39 on the results is likely minimal.  
40  
41  
42  
43  
44  
45  
46  
47

48  
49 The EGB offers the advantage of a limited number of patients lost to follow-up given the  
50 universal healthcare system present in France. It also has a few limitations: while most  
51 patients were covered by the general scheme, patients covered by other plans may not have  
52 been selected due to the later integration of those plans in the EGB. Also, the algorithm used  
53 to define asthma and index date excluded patients who died at the hospital around the time of  
54  
55  
56  
57  
58  
59  
60

1  
2  
3 the index date, thereby potentially excluding the most severe and uncontrolled patients.

4  
5 Finally, additional residual confounding factors may persist despite the matching process.

6  
7  
8 This large study, which is the first allowing the comparison between uncontrolled severe  
9  
10 asthmatic patients and other asthmatic patients and the general population, highlighted that  
11  
12 severe asthma associated with non-control significantly affects mortality, healthcare use, and  
13  
14 associated costs. This emphasized that close attention should be paid to ensure appropriate  
15  
16 management of severe asthmatic patients and monitoring of the level of control of asthma  
17  
18 symptoms.  
19  
20  
21  
22  
23  
24  
25  
26  
27  
28  
29  
30  
31  
32  
33  
34  
35  
36  
37  
38  
39  
40  
41  
42  
43  
44  
45  
46  
47  
48  
49  
50  
51  
52  
53  
54  
55  
56  
57  
58  
59  
60

## CONCLUSIONS

This database study demonstrates the huge burden of uncontrolled severe asthma in terms of mortality, morbidity, and healthcare resource consumption compared to other patients with asthma and the general population. These findings emphasize the importance of appropriate management in this high-risk population.

For peer review only



1  
2  
3 **Acknowledgments** The authors gratefully acknowledge the assistance of Anaïs Havet,  
4 PharmD, PhD of **stève** consultants for assistance in drafting of this manuscript, which was  
5 funded by Sanofi.  
6  
7  
8  
9

10 **Contributors** All authors participated in the interpretation of the data, provided critical  
11 feedback and final approval for submission, and took responsibility for the accuracy,  
12 completeness, and protocol adherence of data and analyses. Stève Bénard had full access to  
13 all of the data in the study and takes responsibility for the integrity of the data and the accuracy  
14 of the data analysis.  
15  
16  
17

18 *Concept and design:* all authors

19 *Acquisition, analysis, or interpretation of data:* all authors

20 *Drafting of the manuscript:* de Larrard and Bénard

21 *Critical revision of the manuscript for important intellectual content:* Roche, Demoly,  
22 Garcia, Cancalon, Perez, Mahieu and Vieu

23 *Statistical analysis:* de Larrard, Bénard and Cancalon

24 *Administrative, technical, or material support:* Bénard, Perez, Mahieu and Vieu

25 *Supervision:* all authors  
26  
27  
28  
29  
30  
31  
32

33 **Funding** This work was supported by Sanofi-Aventis France.  
34  
35

36 **Competing interests** Pr Pascal Demoly has received honoraria and/or research grants from  
37 ALK, Mylan-Viatrix, Stallergènes, ThermoFisher Scientific, AstraZeneca, GSK, Novartis,  
38 Ménarini, and Regeneron.  
39

40 Pr Gilles Garcia has received honoraria from ALK, Novartis, AstraZeneca, GSK, Sanofi and  
41 Chiesi for conferences or advisory board meetings.  
42

43 Pr Nicolas Roche has received research funding from Boehringer Ingelheim, GSK, Pfizer and  
44 Novartis and honoraria from Boehringer Ingelheim, Pfizer, Novartis, Teva, GSK, AstraZeneca,  
45 Chiesi, Sanofi, and Zambon.  
46  
47

48 No other disclosures were reported.  
49

50 Laurine Vieu, Aymeric Mahieu, Vincent Perez are Sanofi employee and may hold shares  
51 and/or stock options in the company.  
52  
53  
54

55 **Patient consent for publication** Not required.  
56  
57

58 **Data Availability Statement** No additional data available.  
59  
60

## REFERENCES

- 1 Busse WW, Banks-Schlegel S, Wenzel SE. Pathophysiology of severe asthma. *J Allergy Clin Immunol* 2000;106:1033–42. doi:10.1067/mai.2000.111307
- 2 Israel E, Reddel HK. Severe and Difficult-to-Treat Asthma in Adults. *N Engl J Med* 2017;377:965–76. doi:10.1056/NEJMra1608969
- 3 Yaghoubi M, Adibi A, Safari A, *et al.* The Projected Economic and Health Burden of Uncontrolled Asthma in the United States. *Am J Respir Crit Care Med* 2019;200:1102–12. doi:10.1164/rccm.201901-0016OC
- 4 O'Neill S, Sweeney J, Patterson CC, *et al.* The cost of treating severe refractory asthma in the UK: an economic analysis from the British Thoracic Society Difficult Asthma Registry. *Thorax* 2015;70:376–8. doi:10.1136/thoraxjnl-2013-204114
- 5 Godard P, Chanez P, Siraudin L, *et al.* Costs of asthma are correlated with severity: a 1-yr prospective study. *Eur Respir J* 2002;19:61–7. doi:10.1183/09031936.02.00232001
- 6 Chastek B, Korrer S, Nagar SP, *et al.* Economic Burden of Illness Among Patients with Severe Asthma in a Managed Care Setting. *J Manag Care Spec Pharm* 2016;22:848–61. doi:10.18553/jmcp.2016.22.7.848
- 7 Bahadori K, Doyle-Waters MM, Marra C, *et al.* Economic burden of asthma: a systematic review. *BMC Pulm Med* 2009;9:24. doi:10.1186/1471-2466-9-24
- 8 Moulis G, Lapeyre-Mestre M, Palmaro A, *et al.* French health insurance databases: What interest for medical research? *Rev Med Interne* 2015;36:411–7. doi:10.1016/j.revmed.2014.11.009
- 9 Bezin J, Duong M, Lassalle R, *et al.* The national healthcare system claims databases in France, SNIIRAM and EGB: Powerful tools for pharmacoepidemiology. *Pharmacoepidemiol Drug Saf* 2017;26:954–62. doi:10.1002/pds.4233
- 10 Catherine Quantin and Caisse nationale d'Assurance maladie des travailleurs salariés (CNAMTS). Etude des algorithmes de définition de pathologies dans le système national d'information inter-régimes de l'assurance maladie (SNIIRAM). Deuxième partie: Recensement des équipes utilisant les données du SNIIRAM, ainsi que des algorithmes d'identification de pathologies et des travaux publiés. Aug 2015. [https://assurance-maladie.ameli.fr/sites/default/files/2014\\_etude-algorithmes-definition-pathologies-partie-2\\_cartographie.pdf](https://assurance-maladie.ameli.fr/sites/default/files/2014_etude-algorithmes-definition-pathologies-partie-2_cartographie.pdf). Accessed November, 2021.
- 11 Catherine Quantin and Caisse nationale d'Assurance maladie des travailleurs salariés (CNAMTS). Etude des algorithmes de définition de pathologies dans le système national d'information inter-régimes de l'assurance maladie (SNIIRAM). Première partie: Les algorithmes d'identification de pathologies utilisés par la cartographie des patients et des dépenses, développée par la Caisse nationale de l'Assurance maladie des travailleurs salariés. Aug 2015. [https://assurance-maladie.ameli.fr/sites/default/files/2014\\_etude-algorithmes-definition-pathologies-partie-1\\_cartographie.pdf](https://assurance-maladie.ameli.fr/sites/default/files/2014_etude-algorithmes-definition-pathologies-partie-1_cartographie.pdf). Accessed November, 2021.
- 12 Bourdin A, Fabry-Vendrand C, Ostinelli J, *et al.* The Burden of Severe Asthma in France: A Case-Control Study Using a Medical Claims Database. *J Allergy Clin Immunol Pract* 2019;7:1477–87. doi:10.1016/j.jaip.2018.12.029
- 13 Global Initiative for Asthma. 2018 GINA Report: Global Strategy for Asthma Management and Prevention; pp.35-88. <https://ginasthma.org/wp-content/uploads/2018/04/wms-GINA-2018-report-V1.3-002.pdf>. Accessed November, 2021.

1  
2  
3 14 Jalaludin BB, Smith MA, Chey T, *et al.* Risk factors for asthma deaths: a population-  
4 based, case-control study. *Aust N Z J Public Health* 1999;23:595–600. doi:10.1111/j.1467-  
5 842x.1999.tb01543.x

6  
7 15 Enquête Santé et Protection Sociale (ESPS). Corrélations entre asthme déclaré et  
8 remboursements de médicaments dans l'enquête ESPS 2006. 2012.  
9 [https://www.santepubliquefrance.fr/maladies-et-traumatismes/maladies-et-infections-](https://www.santepubliquefrance.fr/maladies-et-traumatismes/maladies-et-infections-respiratoires/asthme/documents/rapport-synthese/correlations-entre-asthme-declare-et-remboursements-de-medicaments-dans-l-enquete-esps-2006.-peut-on-proposer-des-indicateurs-de-suivi-de-la-prise)  
10 [respiratoires/asthme/documents/rapport-synthese/correlations-entre-asthme-declare-et-](https://www.santepubliquefrance.fr/maladies-et-traumatismes/maladies-et-infections-respiratoires/asthme/documents/rapport-synthese/correlations-entre-asthme-declare-et-remboursements-de-medicaments-dans-l-enquete-esps-2006.-peut-on-proposer-des-indicateurs-de-suivi-de-la-prise)  
11 [remboursements-de-medicaments-dans-l-enquete-esps-2006.-peut-on-proposer-des-](https://www.santepubliquefrance.fr/maladies-et-traumatismes/maladies-et-infections-respiratoires/asthme/documents/rapport-synthese/correlations-entre-asthme-declare-et-remboursements-de-medicaments-dans-l-enquete-esps-2006.-peut-on-proposer-des-indicateurs-de-suivi-de-la-prise)  
12 [indicateurs-de-suivi-de-la-prise](https://www.santepubliquefrance.fr/maladies-et-traumatismes/maladies-et-infections-respiratoires/asthme/documents/rapport-synthese/correlations-entre-asthme-declare-et-remboursements-de-medicaments-dans-l-enquete-esps-2006.-peut-on-proposer-des-indicateurs-de-suivi-de-la-prise). Accessed November, 2021.

13  
14 16 Jacob C, Haas JS, Bechtel B, *et al.* Assessing asthma severity based on claims data:  
15 a systematic review. *Eur J Health Econ* 2017;18:227–41. doi:10.1007/s10198-016-0769-2.  
16  
17  
18  
19  
20  
21  
22  
23  
24  
25  
26  
27  
28  
29  
30  
31  
32  
33  
34  
35  
36  
37  
38  
39  
40  
41  
42  
43  
44  
45  
46  
47  
48  
49  
50  
51  
52  
53  
54  
55  
56  
57  
58  
59  
60

For peer review only

## LIST OF FIGURE TITLES AND LEGENDS

FIGURE 1. RESONANCE study design

FIGURE 2. 24-month survival for the uncontrolled severe asthmatic cohort vs general population and asthmatic control cohorts

For peer review only

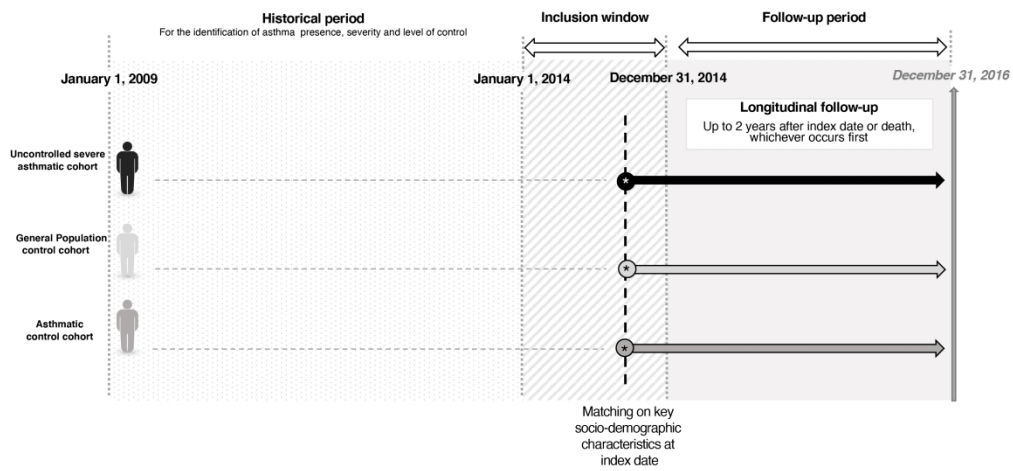

FIGURE 1. RESONANCE study design

286x137mm (300 x 300 DPI)

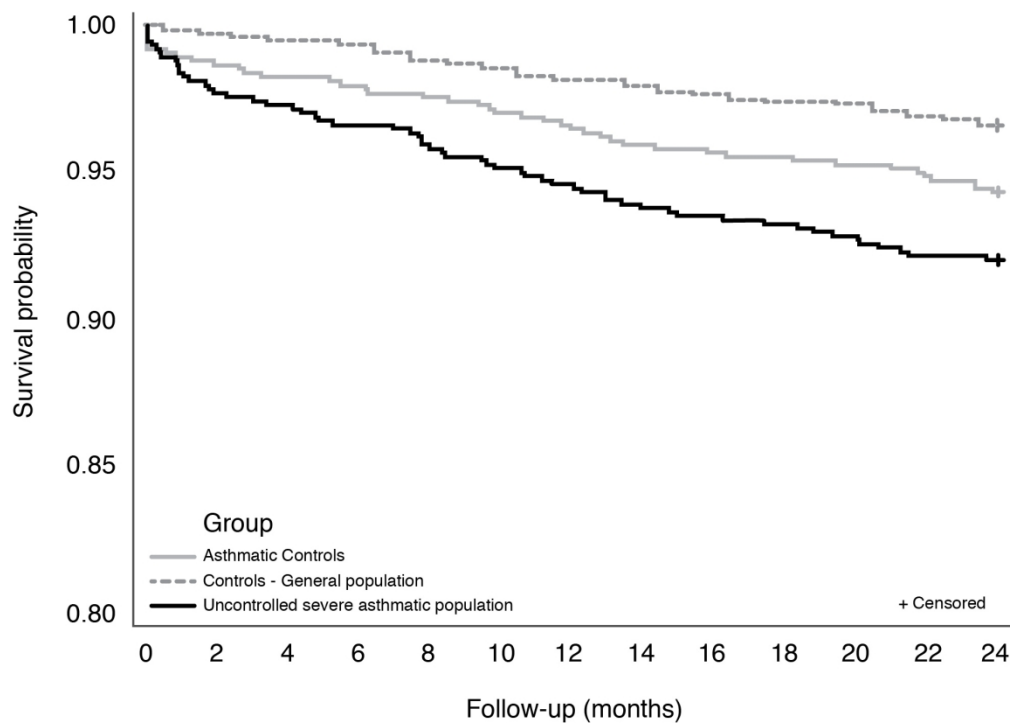

FIGURE 2. 24-month survival for the uncontrolled severe asthmatic cohort vs. general population and asthmatic control cohorts

166x119mm (300 x 300 DPI)

## Real-life impact of uncontrolled severe asthma on mortality and healthcare use in adolescents and adults: the RESONANCE study

Nicolas Roche<sup>1</sup>, Gilles Garcia<sup>2</sup>, Alexandre de Larrard<sup>3</sup>, Charlotte Cancalon<sup>3</sup>, Stève Bénéard<sup>3</sup>, Vincent Perez<sup>4</sup>, Aymeric Mahieu<sup>4</sup>, Laurine Vieu<sup>4</sup>, Pascal Demoly<sup>5</sup>

### Supplementary materials

#### FIGURE S1. Patient selection algorithm

Key: ALD – affection de longue durée (long-term condition); ATC – Anatomical Therapeutic Chemical; COPD – chronic obstructive pulmonary disease; ICD-10 – International Classification of Diseases, 10th Revision; ICS – inhaled corticosteroid; LABA – long-acting  $\beta$ 2-agonist; LAMA – long-acting muscarinic antagonist; OCS – oral corticosteroid.

Footnote:

\* Of note, these criteria did not apply to patients with an ALD other than asthma (ie, rheumatoid arthritis, ulcerative colitis, Crohn's disease, cancer, etc) who can be treated by OCS identified by an exploratory analysis of ALD of patients from the target population meeting criterion.

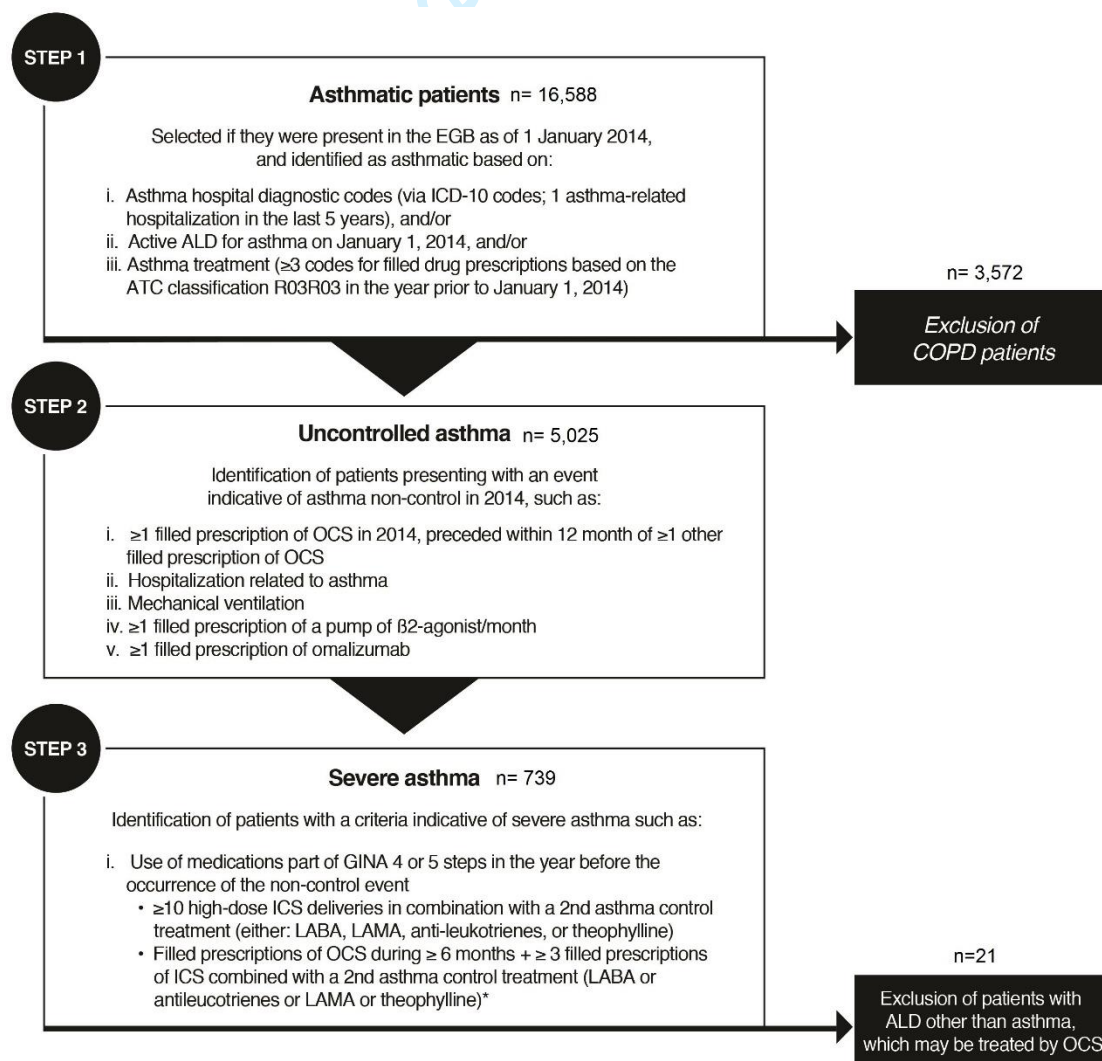

## Methods – Additional details on drugs of interest

### Asthma treatments:

- short-acting beta2-agonists (SABA),
- long-acting beta2-agonists (LABA),
- long-acting anticholinergics (LAMA),
- antileukotriene receptor antagonists (LTRA),
- xanthines,
- inhaled and oral corticosteroids (ICS and OCS),
- combination treatments.

### Other drug classes of interest:

- nasal antihistamines,
- antihistamines,
- nonsteroidal anti-inflammatory drugs (NSAIDs),
- antibiotics,
- proton pump inhibitors (PPIs),
- psychotropic drugs,
- topical corticosteroids,
- topical immunosuppressants.

## Methods – ICD-10 codes used

### For the Asthma definition

- J45.0 Predominantly allergic asthma
- J45.1 Non-allergic asthma
- J45.8 Mixed asthma
- J45.9 Asthma, Unspecified
- J46 Status asthmaticus
- J96 Respiratory failure, not elsewhere classified

### For the COPD definition

- J41 Simple and mucopurulent chronic bronchitis
- J42 Unspecified chronic bronchitis
- J43 Emphysema
- J44 Other chronic obstructive pulmonary disease
- J47 Bronchiectasis
- J61 Pneumoconiosis due to asbestos and other mineral fiber
- J62.8 Pneumoconiosis due to other dust containing silica
- J68.0 Bronchitis due to chemicals, gases, fumes and vapors
- E84 Mucoviscidosis
- J92.0 Pleural plaque with presence of asbestos
- J94.8 Other specified pleural conditions
- J96.1+0 Insuffisance respiratoire chronique obstructive



**Methods – Variables defined for matching**

1. nasal corticosteroid (Yes/No)
2. systemic antihistamine (Yes/No)
3. non-steroidal anti-inflammatory drugs (Yes/No)
4. antibiotic (Yes/No)
5. proton pump inhibitor (Yes/No)
6. dermocorticoids (Yes/No)
7. psychotropic drug (Yes/No)
8. age (years)
9. number of outpatient consultations
10. charlson's score
11. consultation with a nurse (Yes/No)
12. cardio-vascular diseases (Yes/No)
13. ocular antihistamine (Yes/No)
14. hypertension (Yes/No)
15. osteoporosis (Yes/No)
16. number of consultations with a physiotherapist
17. consultations with a physiotherapist (Yes/No)
18. depression (Yes/No)
19. psychiatric illness (Yes/No)
20. number of emergency room visits
21. hospitalisation (Yes/No)
22. number of consultations with a nurse
23. emergency room visits (Yes/No)
24. number of hospitalizations
25. nasal antihistamine (Yes/No)
26. cataract (Yes/No)
27. nasal polyposis (Yes/No)
28. number of hospital consultations
29. gastroesophageal reflux (Yes/No)
30. dyslipidemia (Yes/No)
31. arrhythmia (Yes/No)
32. hospital consultations (Yes/No)
33. cerebrovascular diseases (Yes/No)
34. anxiety (Yes/No)
35. rhinosinusitis (Yes/No)
36. heart failure (Yes/No)
37. diabetes (Yes/No)
38. coronary heart disease (Yes/No)
39. sex
40. psychotic disorders (Yes/No)
41. outpatient consultation (Yes/No)
42. topical immunosuppressant (Yes/No)
43. CMU (Yes/No)
44. myocardial infarction (Yes/No)
45. atopic dermatitis (Yes/No)

**FIGURE S2. Analysis of mortality by age group**

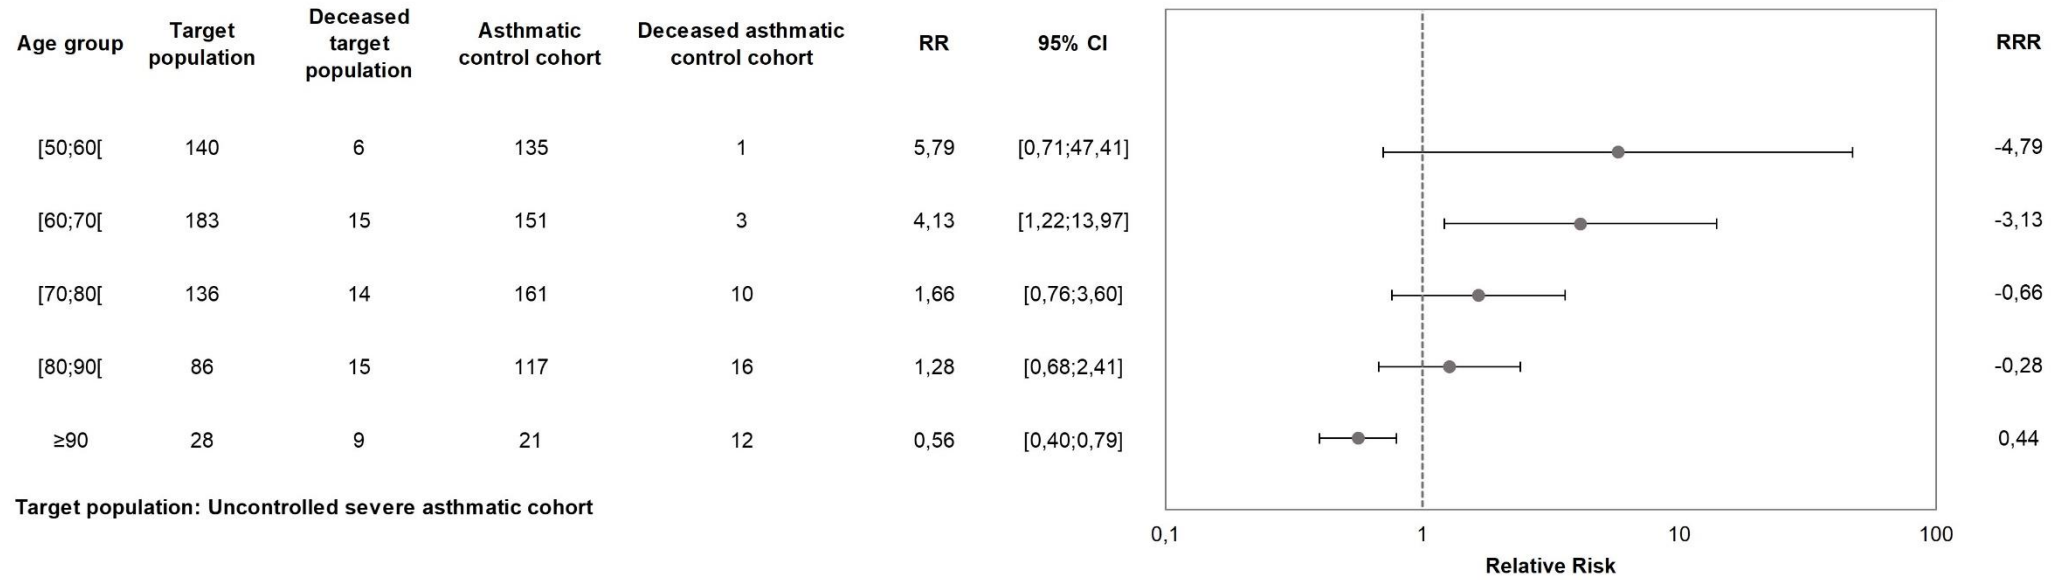

**Table S1. Results of multivariate Cox model among uncontrolled severe asthmatic cohort and controls of general population**

| Covariate                                                                                                | Hazard ratio | 95% CI       |
|----------------------------------------------------------------------------------------------------------|--------------|--------------|
| Population with history of psychiatric diseases (target population vs controls of general population)    | 1.224        | 0.663, 2.260 |
| Population without history of psychiatric diseases (target population vs controls of general population) | 3.246        | 2.140, 4.922 |
| Age (1-year increase)                                                                                    | 1.068        | 1.052, 1.085 |
| History of cardiovascular diseases (with vs without)                                                     | 1.911        | 1.181, 3.092 |
| History of diabetes (with vs without)                                                                    | 1.661        | 1.110, 2.485 |
| History of psychiatric diseases: Target population (with vs without)                                     | 0.927        | 0.521, 1.649 |
| History of psychiatric diseases: Controls of general population (with vs without)                        | 2.457        | 1.541, 3.916 |
| Cancer comorbidity of the Charlson score (with vs without)                                               | 2.395        | 1.639, 3.500 |

Key: CI – confidence interval.

**FIGURE S3. 24-month survival for the uncontrolled severe asthmatic cohort versus general population among subjects without history of psychiatric disease**

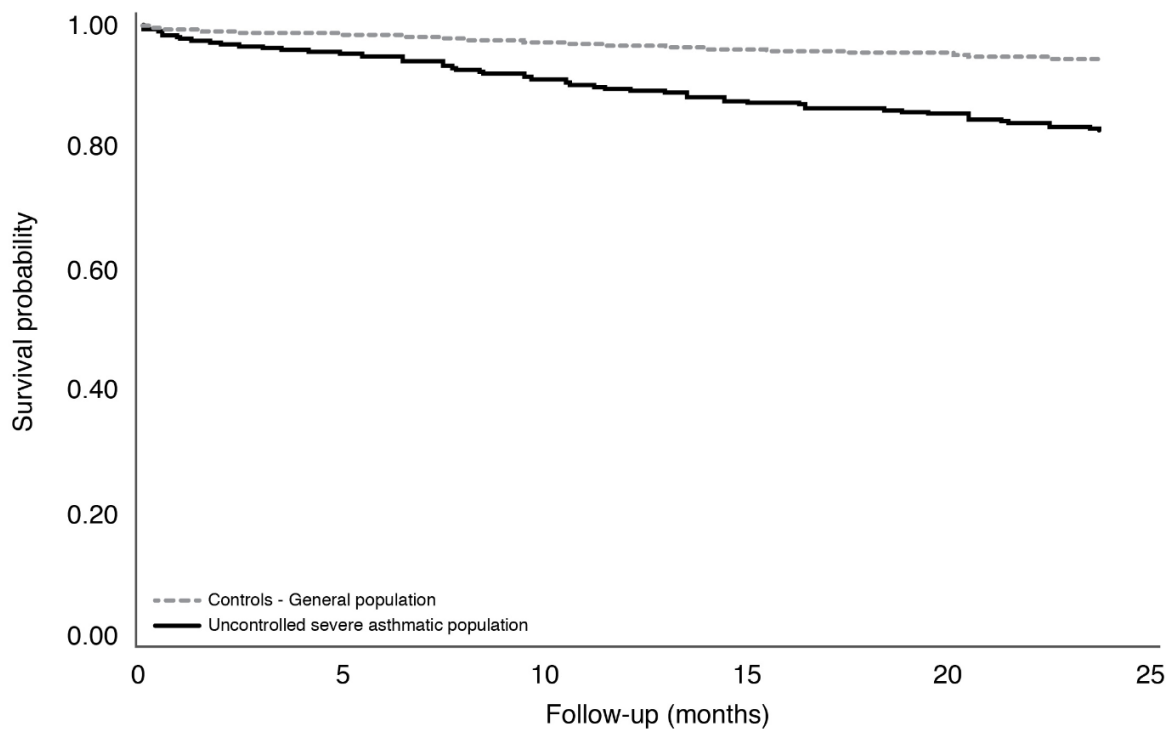

Review only

STROBE Statement—Checklist of items that should be included in reports of *cohort studies*

|                              | Item No | Recommendation                                                                                                                                                                                                                                                                                                         | Page No          |
|------------------------------|---------|------------------------------------------------------------------------------------------------------------------------------------------------------------------------------------------------------------------------------------------------------------------------------------------------------------------------|------------------|
| <b>Title and abstract</b>    | 1       | (a) Indicate the study's design with a commonly used term in the title or the abstract<br>(b) Provide in the abstract an informative and balanced summary of what was done and what was found                                                                                                                          | 1-3              |
| <b>Introduction</b>          |         |                                                                                                                                                                                                                                                                                                                        |                  |
| Background/rationale         | 2       | Explain the scientific background and rationale for the investigation being reported                                                                                                                                                                                                                                   | 5                |
| Objectives                   | 3       | State specific objectives, including any prespecified hypotheses                                                                                                                                                                                                                                                       | 5                |
| <b>Methods</b>               |         |                                                                                                                                                                                                                                                                                                                        |                  |
| Study design                 | 4       | Present key elements of study design early in the paper                                                                                                                                                                                                                                                                | 6                |
| Setting                      | 5       | Describe the setting, locations, and relevant dates, including periods of recruitment, exposure, follow-up, and data collection                                                                                                                                                                                        | 6                |
| Participants                 | 6       | (a) Give the eligibility criteria, and the sources and methods of selection of participants. Describe methods of follow-up<br>(b) For matched studies, give matching criteria and number of exposed and unexposed                                                                                                      | 7                |
| Variables                    | 7       | Clearly define all outcomes, exposures, predictors, potential confounders, and effect modifiers. Give diagnostic criteria, if applicable                                                                                                                                                                               | 7-8              |
| Data sources/<br>measurement | 8*      | For each variable of interest, give sources of data and details of methods of assessment (measurement). Describe comparability of assessment methods if there is more than one group                                                                                                                                   | 6                |
| Bias                         | 9       | Describe any efforts to address potential sources of bias                                                                                                                                                                                                                                                              | 7                |
| Study size                   | 10      | Explain how the study size was arrived at                                                                                                                                                                                                                                                                              | 7<br>(Figure S1) |
| Quantitative variables       | 11      | Explain how quantitative variables were handled in the analyses. If applicable, describe which groupings were chosen and why                                                                                                                                                                                           | 8                |
| Statistical methods          | 12      | (a) Describe all statistical methods, including those used to control for confounding<br>(b) Describe any methods used to examine subgroups and interactions<br>(c) Explain how missing data were addressed<br>(d) If applicable, explain how loss to follow-up was addressed<br>(e) Describe any sensitivity analyses | 8-9              |
| <b>Results</b>               |         |                                                                                                                                                                                                                                                                                                                        |                  |
| Participants                 | 13*     | (a) Report numbers of individuals at each stage of study—eg numbers potentially eligible, examined for eligibility, confirmed eligible, included in the study, completing follow-up, and analysed<br>(b) Give reasons for non-participation at each stage<br>(c) Consider use of a flow diagram                        | 10               |
| Descriptive data             | 14*     | (a) Give characteristics of study participants (eg demographic, clinical, social) and information on exposures and potential confounders<br>(b) Indicate number of participants with missing data for each variable of interest<br>(c) Summarise follow-up time (eg, average and total amount)                         | 10               |
| Outcome data                 | 15*     | Report numbers of outcome events or summary measures over time                                                                                                                                                                                                                                                         | 10-12            |

|    |                          |    |                                                                                                                                                                                                              |
|----|--------------------------|----|--------------------------------------------------------------------------------------------------------------------------------------------------------------------------------------------------------------|
| 1  |                          |    |                                                                                                                                                                                                              |
| 2  |                          |    |                                                                                                                                                                                                              |
| 3  | Main results             | 16 | (a) Give unadjusted estimates and, if applicable, confounder-adjusted estimates and their precision (eg, 95% confidence interval). Make clear which confounders were adjusted for and why they were included |
| 4  |                          |    |                                                                                                                                                                                                              |
| 5  |                          |    |                                                                                                                                                                                                              |
| 6  |                          |    | (b) Report category boundaries when continuous variables were categorized                                                                                                                                    |
| 7  |                          |    |                                                                                                                                                                                                              |
| 8  |                          |    | (c) If relevant, consider translating estimates of relative risk into absolute risk for a meaningful time period                                                                                             |
| 9  |                          |    |                                                                                                                                                                                                              |
| 10 |                          |    |                                                                                                                                                                                                              |
| 11 | Other analyses           | 17 | Report other analyses done—eg analyses of subgroups and interactions, and sensitivity analyses                                                                                                               |
| 12 |                          |    |                                                                                                                                                                                                              |
| 13 | <b>Discussion</b>        |    |                                                                                                                                                                                                              |
| 14 | Key results              | 18 | Summarise key results with reference to study objectives                                                                                                                                                     |
| 15 |                          |    |                                                                                                                                                                                                              |
| 16 | Limitations              | 19 | Discuss limitations of the study, taking into account sources of potential bias or imprecision. Discuss both direction and magnitude of any potential bias                                                   |
| 17 |                          |    |                                                                                                                                                                                                              |
| 18 | Interpretation           | 20 | Give a cautious overall interpretation of results considering objectives, limitations, multiplicity of analyses, results from similar studies, and other relevant evidence                                   |
| 19 |                          |    |                                                                                                                                                                                                              |
| 20 | Generalisability         | 21 | Discuss the generalisability (external validity) of the study results                                                                                                                                        |
| 21 |                          |    |                                                                                                                                                                                                              |
| 22 |                          |    |                                                                                                                                                                                                              |
| 23 | <b>Other information</b> |    |                                                                                                                                                                                                              |
| 24 | Funding                  | 22 | Give the source of funding and the role of the funders for the present study and, if applicable, for the original study on which the present article is based                                                |
| 25 |                          |    |                                                                                                                                                                                                              |
| 26 |                          |    |                                                                                                                                                                                                              |
| 27 |                          |    |                                                                                                                                                                                                              |
| 28 |                          |    |                                                                                                                                                                                                              |
| 29 |                          |    |                                                                                                                                                                                                              |
| 30 |                          |    |                                                                                                                                                                                                              |
| 31 |                          |    |                                                                                                                                                                                                              |
| 32 |                          |    |                                                                                                                                                                                                              |
| 33 |                          |    |                                                                                                                                                                                                              |
| 34 |                          |    |                                                                                                                                                                                                              |
| 35 |                          |    |                                                                                                                                                                                                              |
| 36 |                          |    |                                                                                                                                                                                                              |
| 37 |                          |    |                                                                                                                                                                                                              |
| 38 |                          |    |                                                                                                                                                                                                              |
| 39 |                          |    |                                                                                                                                                                                                              |
| 40 |                          |    |                                                                                                                                                                                                              |
| 41 |                          |    |                                                                                                                                                                                                              |
| 42 |                          |    |                                                                                                                                                                                                              |
| 43 |                          |    |                                                                                                                                                                                                              |
| 44 |                          |    |                                                                                                                                                                                                              |
| 45 |                          |    |                                                                                                                                                                                                              |
| 46 |                          |    |                                                                                                                                                                                                              |
| 47 |                          |    |                                                                                                                                                                                                              |
| 48 |                          |    |                                                                                                                                                                                                              |
| 49 |                          |    |                                                                                                                                                                                                              |
| 50 |                          |    |                                                                                                                                                                                                              |
| 51 |                          |    |                                                                                                                                                                                                              |
| 52 |                          |    |                                                                                                                                                                                                              |
| 53 |                          |    |                                                                                                                                                                                                              |
| 54 |                          |    |                                                                                                                                                                                                              |
| 55 |                          |    |                                                                                                                                                                                                              |
| 56 |                          |    |                                                                                                                                                                                                              |
| 57 |                          |    |                                                                                                                                                                                                              |
| 58 |                          |    |                                                                                                                                                                                                              |
| 59 |                          |    |                                                                                                                                                                                                              |
| 60 |                          |    |                                                                                                                                                                                                              |

\*Give information separately for exposed and unexposed groups.

**Note:** An Explanation and Elaboration article discusses each checklist item and gives methodological background and published examples of transparent reporting. The STROBE checklist is best used in conjunction with this article (freely available on the Web sites of PLoS Medicine at <http://www.plosmedicine.org/>, Annals of Internal Medicine at <http://www.annals.org/>, and Epidemiology at <http://www.epidem.com/>). Information on the STROBE Initiative is available at <http://www.strobe-statement.org>.

# BMJ Open

## Real-life impact of uncontrolled severe asthma on mortality and healthcare use in adolescents and adults: findings from the retrospective observational RESONANCE study in France

|                                 |                                                                                                                                                                                                                                                                                                                                                                                                                                                                                                                                                                                                                                                                                                                                                                                                                                                                                                           |
|---------------------------------|-----------------------------------------------------------------------------------------------------------------------------------------------------------------------------------------------------------------------------------------------------------------------------------------------------------------------------------------------------------------------------------------------------------------------------------------------------------------------------------------------------------------------------------------------------------------------------------------------------------------------------------------------------------------------------------------------------------------------------------------------------------------------------------------------------------------------------------------------------------------------------------------------------------|
| Journal:                        | <i>BMJ Open</i>                                                                                                                                                                                                                                                                                                                                                                                                                                                                                                                                                                                                                                                                                                                                                                                                                                                                                           |
| Manuscript ID                   | bmjopen-2021-060160.R1                                                                                                                                                                                                                                                                                                                                                                                                                                                                                                                                                                                                                                                                                                                                                                                                                                                                                    |
| Article Type:                   | Original research                                                                                                                                                                                                                                                                                                                                                                                                                                                                                                                                                                                                                                                                                                                                                                                                                                                                                         |
| Date Submitted by the Author:   | 18-May-2022                                                                                                                                                                                                                                                                                                                                                                                                                                                                                                                                                                                                                                                                                                                                                                                                                                                                                               |
| Complete List of Authors:       | Roche, Nicolas; Assistance Publique - Hopitaux de Paris, Hôpital Cochin, Service de pneumologie ; Centre - Université de Paris, UMR 1016, Institut Cochin<br>Garcia, Gilles; Assistance Publique - Hopitaux de Paris, Université Paris-Sud, Université Paris-Saclay, Hôpital Bicêtre, Service de pneumologie de Larrard, Alexandre; stève consultants<br>Cancalon, Charlotte; stève consultants<br>Bénard, Stève; stève consultants<br>Perez, Vincent; Sanofi-Aventis France SA<br>Mahieu, Aymeric; Sanofi-Aventis France SA<br>Vieu, Laurine; Sanofi-Aventis France SA<br>Demoly, Pascal ; Centre Hospitalier Universitaire de Montpellier, Hôpital Arnaud-de-Villeneuve, Université de Montpellier, Unité d'allergologie, département de pneumologie et addictologie ; Institut Desbrest d'Épidémiologie et de Santé Publique (IDESP) - UA11, UMR INSERM- Université de Montpellier, Campus Santé, IURC |
| <b>Primary Subject Heading</b>: | Respiratory medicine                                                                                                                                                                                                                                                                                                                                                                                                                                                                                                                                                                                                                                                                                                                                                                                                                                                                                      |
| Secondary Subject Heading:      | Health economics, Epidemiology                                                                                                                                                                                                                                                                                                                                                                                                                                                                                                                                                                                                                                                                                                                                                                                                                                                                            |
| Keywords:                       | Asthma < THORACIC MEDICINE, Epidemiology < THORACIC MEDICINE, HEALTH ECONOMICS                                                                                                                                                                                                                                                                                                                                                                                                                                                                                                                                                                                                                                                                                                                                                                                                                            |
|                                 |                                                                                                                                                                                                                                                                                                                                                                                                                                                                                                                                                                                                                                                                                                                                                                                                                                                                                                           |

SCHOLARONE™  
Manuscripts



I, the Submitting Author has the right to grant and does grant on behalf of all authors of the Work (as defined in the below author licence), an exclusive licence and/or a non-exclusive licence for contributions from authors who are: i) UK Crown employees; ii) where BMJ has agreed a CC-BY licence shall apply, and/or iii) in accordance with the terms applicable for US Federal Government officers or employees acting as part of their official duties; on a worldwide, perpetual, irrevocable, royalty-free basis to BMJ Publishing Group Ltd ("BMJ") its licensees and where the relevant Journal is co-owned by BMJ to the co-owners of the Journal, to publish the Work in this journal and any other BMJ products and to exploit all rights, as set out in our [licence](#).

The Submitting Author accepts and understands that any supply made under these terms is made by BMJ to the Submitting Author unless you are acting as an employee on behalf of your employer or a postgraduate student of an affiliated institution which is paying any applicable article publishing charge ("APC") for Open Access articles. Where the Submitting Author wishes to make the Work available on an Open Access basis (and intends to pay the relevant APC), the terms of reuse of such Open Access shall be governed by a Creative Commons licence – details of these licences and which [Creative Commons](#) licence will apply to this Work are set out in our licence referred to above.

Other than as permitted in any relevant BMJ Author's Self Archiving Policies, I confirm this Work has not been accepted for publication elsewhere, is not being considered for publication elsewhere and does not duplicate material already published. I confirm all authors consent to publication of this Work and authorise the granting of this licence.



1  
2  
3  
4 **Word Count:** 3,414 words

5  
6 **Real-life impact of uncontrolled severe asthma on mortality and healthcare use in**  
7 **adolescents and adults: findings from the retrospective observational RESONANCE**  
8 **study in France**  
9

10  
11 Nicolas Roche, MD<sup>1</sup>, Gilles Garcia, MD<sup>2</sup>, Alexandre de Larrard, PharmD<sup>3</sup>, Charlotte Cancalon,  
12 MSc<sup>3</sup>, Stève Bénard, PharmD<sup>3</sup>, Vincent Perez, MD<sup>4</sup>, Aymeric Mahieu, PharmD<sup>4</sup>, Laurine Vieu,  
13 PharmD<sup>4</sup>, Pascal Demoly, MD<sup>5</sup>  
14  
15

16  
17 <sup>1</sup> Pneumologie, Hôpital Cochin, APHP. Centre - Université de Paris, UMR 1016, Institut  
18 Cochin, 27 rue du Fbg St Jacques, 75014 Paris, France.  
19

20  
21 <sup>2</sup> Assistance Publique-Hôpitaux de Paris, Université Paris-Sud, Université Paris-Saclay,  
22 Hôpital Bicêtre, Service de pneumologie, 78, rue du Général-Leclerc, 94270 Le Kremlin-  
23 Bicêtre, France.  
24

25  
26 <sup>3</sup> stève consultants, Oullins, France.  
27

28  
29 <sup>4</sup> Sanofi-Aventis France, Gentilly, France.  
30

31  
32 <sup>5</sup> Unité d'allergologie, département de pneumologie et addictologie, Hôpital Arnaud-de-  
33 Villeneuve, Université de Montpellier, CHU de Montpellier, 371, avenue du Doyen Gaston  
34 Giraud, 34090 Montpellier, France; Institut Desbrest d'Épidémiologie et de Santé Publique  
35 (IDESP) - UA11, UMR INSERM-Université de Montpellier, Campus Santé, IURC, 641 avenue  
36 du Doyen Gaston Giraud, 34093 Montpellier Cedex 5, France.  
37  
38  
39

40  
41 **Corresponding author:**

42  
43 Nicolas Roche

44  
45 Pneumologie, Hôpital Cochin, AP-HP. Centre - Université de Paris (Descartes), UMR 1016,  
46 Institut Cochin

47  
48 27 rue du Fbg St Jacques, 75014 Paris, France

49  
50 T: +33 158 41 21 53

51  
52 E: nicolas.roche@aphp.fr  
53  
54  
55  
56  
57  
58  
59  
60

## ABSTRACT

**Word Count: 300**

**Objective:** To characterize uncontrolled severe asthma and compare the disease burden with the general and asthmatic populations.

**Design:** Retrospective observational study using a national sample of a French healthcare database (*Echantillon Généraliste des Bénéficiaires [EGB]*).

**Setting:** The EGB, an anonymized permanent sample of health insurance databases, representing 1/97<sup>th</sup> of the French population.

**Participants:** Patients ( $\geq 12$  years) were selected in year 2014 and followed 2 years. A cohort of patients with uncontrolled severe asthma was defined using an algorithm based on peer-reviewed literature and Global Initiative for Asthma recommendations. Index date was the occurrence of the first marker of uncontrolled asthma. This cohort was matched with 2 control cohorts, general population and asthmatic controls, on baseline characteristics.

**Main outcomes measures:** Mortality, healthcare use, and associated costs were studied in the 2 years of follow-up.

**Results:** Among 467,716 individuals in the EGB, 16,588 patients with asthma were identified, including 739 (4.5%) with uncontrolled severe disease. The survival probability at 2 years for patients with uncontrolled severe asthma (92.0%) was lower than in the general population cohort (96.6%; relative risk of death: 2.35; 95% confidence interval: 1.70-3.29;  $P < 0.0001$ ) and tended to be lower than in the control asthmatic cohort (94.3%;  $P = 0.07$ ). Emergency department visits and hospitalizations were higher in patients with uncontrolled severe asthma than in the general population (64.7% vs. 34.9%;  $P < 0.0001$ ) and asthmatic controls (64.7% vs. 55.2%;  $P = 0.0002$ ). Other components of healthcare use (medical and paramedical visits, medications) were increased in patients with uncontrolled severe asthma compared with control populations. These increases translated into higher costs ( $P < 0.0001$  for both comparisons).

1  
2  
3 **Conclusions:** This study demonstrates the huge burden of uncontrolled severe asthma in  
4 terms of mortality, morbidity, and healthcare resource consumption compared to other patients  
5 with asthma and the general population, and emphasizes the importance of appropriate  
6 management in this high-risk population.  
7  
8  
9  
10  
11  
12  
13  
14  
15  
16  
17  
18  
19  
20  
21  
22  
23  
24  
25  
26  
27  
28  
29  
30  
31  
32  
33  
34  
35  
36  
37  
38  
39  
40  
41  
42  
43  
44  
45  
46  
47  
48  
49  
50  
51  
52  
53  
54  
55  
56  
57  
58  
59  
60

For peer review only

**Strengths and limitations of this study:**

- The study was conducted using a well-recognized and robust populational medical administrative database that confers many advantages, such as the completeness of mortality data and comprehensiveness of healthcare reimbursed for all patients.
- This is the first study to specifically compare patients with uncontrolled severe asthma with the overall asthmatic population.
- Comparability of studied groups was ensured by careful matching process.
- The lack of clinical data was mitigated by the use of a comprehensive algorithm to identify the uncontrolled severe asthmatic population with great care in the definitions of asthma, severity, and control to ensure the accuracy of the cohorts.
- The criteria requiring continuous insurance coverage may have resulted in a marginally lower number of younger patients being included due to student-specific insurance offered during school years.

## INTRODUCTION

Asthma is one of the most common chronic diseases and is a major cause of morbidity. This heterogeneous disease is characterized by its chronic inflammatory nature which can lead to airway remodeling and presents with varied levels of severity and control. While a majority of patients with asthma have mild to moderate disease according to Global Initiative for Asthma (GINA) criteria, between 3% and 10% present a severe asthma, which may be life-threatening, particularly due to severe and potentially fatal exacerbations.[1,2] Despite implementation of an optimal management strategy, many patients with severe asthma are not able to achieve disease control, leading to poor quality of life and significant social and health burdens. Asthma therefore represents an important public health issue given its impact on work productivity (*i.e.*, absenteeism and presenteeism) and the costs associated with disease management and healthcare resource utilization.[3–7]

In the context of the rapidly evolving landscape of expensive GINA step 5 asthma treatments, it is crucial to generate up-to-date data on the real-life population burden of uncontrolled severe asthma in adolescents and adults and to understand the relative impact of the disease in patients with severe asthma compared to the general and to non-severe asthmatic populations. The framework of the French Health Data Hub project provided the opportunity to access the public medico-administrative database to address this specific issue.

The RESONANCE study was undertaken to: (1) characterize uncontrolled severe asthma in patients aged 12 years and older, and (2) compare the disease burden in terms of mortality, healthcare utilization, and associated costs within this population to two series of matched controls from the general population and the asthmatic population (*i.e.* total asthmatic population excluding those with uncontrolled severe asthma).

## METHODS

### Study Design

A retrospective, non-interventional cohort study was carried out using a large population database from France, the *Echantillon Généraliste des Bénéficiaires* (EGB). All individuals aged 12 years and over in the EGB were included in the source population. A cohort of adolescent and adult patients who had uncontrolled severe asthma during 2014 were identified. Their index date was the date of the first event identifying non-control during 2014. Two control cohorts were defined, one from the general population and another of patients with asthma. For each control selected, the index date assigned was the calendar index date of respective matched patients from the uncontrolled severe asthma cohort.

Historical information on comorbidities, healthcare use, and treatments received were collected up to five years preceding the index date to assess baseline characteristics. Socio-demographic characteristics were collected at index date for the three cohorts. Cohorts were followed up to two years after the index date or death, whichever occurs first, to assess the outcomes of interest (Figure 1).

### Data sources

The EGB is an anonymized permanent sample of health insurance databases representing 1/97th of the entire French population.[8,9] Given the universal healthcare system in France, the EGB is a sizeable and representative sample of all subjects covered by various social security schemes and now includes nearly 660,000 beneficiaries.

The EGB contains information on demographics (age, sex, area of residence, etc.); outpatient care reimbursement (including drug dispensing); medical care and reimbursement received in outpatient and hospital settings; specific information on the right to universal supplementary health coverage (CMU-c); whether beneficiaries are affected by a long-term condition (*affection de longue durée*; ALD); and the date of death. The database benefits from the

1  
2  
3 interlinkage of several administrative data sources, thereby allowing an assessment of  
4 beneficiaries' healthcare utilization over time.  
5  
6

## 7 8 **Subjects** 9

10 Patients with uncontrolled severe asthma were identified using an algorithm based on events  
11 occurring in 2014 (Figure S1, Supplementary File). This algorithm was designed following a  
12 literature review,[10–12] and GINA management recommendations,[13] in collaboration with  
13 an expert scientific committee composed of 3 respiratory specialists.  
14  
15  
16  
17  
18

19 Patients with evidence of another chronic pulmonary disease, including chronic obstructive  
20 pulmonary disease (COPD), identified through International Classification of Diseases, 10th  
21 Revision (ICD-10) or ALD codes, were excluded (see Supplementary File).  
22  
23  
24  
25  
26

27 General population controls were randomly selected among all individuals, besides patients  
28 with uncontrolled severe asthma, present in the EGB in 2014. Controls were eligible to be  
29 matched with patients in the uncontrolled severe asthma cohort if they had the same age, sex,  
30 and CMU-c status at index date. Up to 3 controls per case were selected. Direct matching  
31 quality was assessed by comparing standardized differences between both cohorts (See  
32 Table S1, Supplementary File).  
33  
34  
35  
36  
37  
38  
39  
40

41 Individuals in the asthma cohort were randomly selected within the total asthmatic population  
42 present in the EGB in 2014, excluding those with uncontrolled severe asthma. Individuals were  
43 matched with patients in the uncontrolled severe asthma cohort on a 1:1 ratio using nearest  
44 neighbour propensity score matching. Propensity scores incorporating 45 variables  
45 recommended by the expert scientific committee, including sociodemographic characteristics,  
46 comorbidities, and history of healthcare use prior to index date. Standardized differences were  
47 used to assess matching quality (See Table S2, Supplementary File).  
48  
49  
50  
51  
52  
53  
54  
55  
56

## 57 **Collected data and outcomes** 58

59 The following sociodemographic and clinical characteristics were considered:  
60

- Up to 5 years prior to index date: comorbidities, treatments received, healthcare utilization (medical visits, emergency department [ED] visits, hospitalizations)
- At index date: age, sex, CMU-c status
- During follow-up:
  - Date of death, if applicable
  - Drugs of interest: asthma treatments and other classes of interest (see Supplementary File)
  - Healthcare utilization: Medical and paramedical visits (general medicine, respiratory specialists, otolaryngology, nursing support, physiotherapy), ED visits, and hospitalizations (all-cause and asthma-related)
  - Direct medical costs associated with medications and healthcare use (outpatient and hospital settings)

The primary objective of this study was to assess the number and proportion of patients with uncontrolled severe asthma aged 12 and older. Sociodemographic and clinical characteristics were provided for this population.

The secondary objective was to assess all-cause mortality and survival probability, healthcare use and associated costs in the 2 years after index date in the uncontrolled severe asthma cohort compared to the two matched control cohorts (general population and asthmatic controls).

### **Statistical analyses**

Continuous variables were described using means, standard deviations, medians, and ranges, whilst categorical variables were described as frequencies.

Crude cumulative all-cause mortality rates at 2 years were obtained for all cohorts using the Kaplan-Meier methodology, whereby the probability of survival from index date through follow-up was estimated. The comparative analyses of mortality, healthcare utilization, and



1  
2  
3 associated costs between the primary cohort and matched controls were conducted using  
4 paired Student's *t*-tests or Wilcoxon signed-rank tests for quantitative variables according to  
5 their distribution, and Mc Nemar tests for qualitative variables. A post-hoc analysis using a  
6  
7 Cox regression model was built to compare mortality between the uncontrolled severe  
8  
9 asthmatic cohort and general population. The final model included the following variables:  
10  
11 population (uncontrolled severe asthmatic cohort vs. general population), age, history of  
12  
13 cardiovascular disease, diabetes, psychiatric disease, and cancer. Interactions between the  
14  
15 variable "population" and other covariates included in the model were tested. Interaction  
16  
17 between population and history of psychiatric disease was significant and was thus included  
18  
19 in the final model. Costs were evaluated from the collective perspective, and all costs were  
20  
21 reevaluated with adjustment to 2018 Euros (€) using a consumer price index (health data  
22  
23 index 4011-E, published by national institute of statistics and economic studies, *Institut*  
24  
25 *National de la Statistique et des Études Économiques, INSEE*), since 2018 was the date of  
26  
27 data access. All analyses were performed using the SAS 9.4 software package (SAS Institute,  
28  
29 Cary, NC, USA).

### 35 36 **Ethical considerations**

37 The data considered as part of this study were anonymized to ensure confidentiality at the  
38  
39 patient level. Data handling, processing, and analysis were carried out in alignment and with  
40  
41 authorizations from an independent committee (*CEREES, Comité d'Expertise pour les*  
42  
43 *Recherches, les Études et les Évaluations dans le domaine de la Santé*; favorable opinion on  
44  
45 June 14, 2018; TPS 31996) and from the French National Data Protection Agency (*CNIL,*  
46  
47 *Commission Nationale de l'Informatique et des Libertés*; Authorization DR-2018-097).

### 51 52 **Patient and Public Involvement Statement**

53 Patients and the public were not involved in the design, or conduct, or reporting, or  
54  
55 dissemination plans of our research.  
56  
57  
58  
59  
60

## RESULTS

### Population selection

Of the 467,716 adolescents and adults present in the EGB, a total of 16,588 patients with asthma were identified and 5,025 of these exhibited a marker of uncontrolled disease in 2014 (Figure S1, Supplementary File). Among these, 739 patients with uncontrolled severe asthma were identified (57% female; mean age: 62.0 years; 10.0% with CMU-c, Tables S1 and S2, Supplementary File).

A total of 2,217 matched individuals were selected to build the control cohort from the general population (Table S1, Supplementary File). The control asthmatic population (all patients with asthma excluding those with uncontrolled severe asthma) included 739 patients matched to patients with uncontrolled severe asthma using propensity scores (53.0% women; mean age: 63.2 years; 7.7% with CMU-c, Table S2, Supplementary File). The majority of the 45 variables defined for matching were successfully balanced (Table S2 and Figure S2, Supplementary File).

### Mortality

In total, 59 patients with uncontrolled severe asthma died in the 2-year follow-up period. The probability of survival at 2 years in this cohort was 92.0%, which is statistically significantly lower than that observed in the matched control cohort from the general population (96.6%; relative risk [RR] of death: 2.35; 95% CI: 1.70, 3.29;  $P < 0.0001$ ). A significantly increased mortality was notably seen among those aged 50 to <60 years old (RR: 18.0; 95% CI: 2.2, 148.2) and those aged 60 to <70 years old (RR: 4.1; 95% CI: 1.9, 8.7). While the asthmatic control cohort had a numerically higher survival probability at 2 years than the uncontrolled severe asthmatic cohort, the difference was not significant (94.3% vs. 92.0%;  $P = 0.0747$ ). However, the analysis of mortality by age group showed a statistically significantly higher risk of mortality in patients aged 60 to <70 years (8% vs. 2% deaths in uncontrolled severe asthmatic cohort vs. asthmatic control cohort; RR: 4.1; 95% CI: 1.2, 14.0; Figure S3, Supplementary File).

1  
2  
3 Figure 2 shows survival over time among the 3 cohorts. Compared with both control cohorts,  
4 the increased risk of mortality in uncontrolled severe asthma cohort was observed early, and  
5 became higher during follow-up.  
6  
7  
8  
9

10 The Cox model showed a significant impact of uncontrolled severe asthma compared to  
11 general population for mortality risk ( $p < 0.0001$ ). Other comorbidities (age, history of  
12 cardiovascular disease, diabetes, and cancer) increased mortality risk, especially cancer  
13 (hazard ratio [HR]: 2.40; 95% CI: 1.64, 3.50; Table S3, Supplementary File). Due to a  
14 significant interaction between population and history of psychiatric disease, effect of  
15 population was assessed by history of psychiatric disease (Table S3, Supplementary File). In  
16 patients without history of psychiatric disease, the mortality risk increased significantly by an  
17 average of 3.25 in the uncontrolled severe asthmatic cohort compared to the general  
18 population cohort (HR: 3.25; 95% CI: 2.14, 4.92). The difference in mortality risk was not  
19 significant in patients with history of psychiatric disease (HR: 1.22; 95% CI: 0.66, 2.26). Figure  
20 S4 shows that, among subjects without history of psychiatric disease, overall survival was  
21 lower in the uncontrolled severe asthmatic cohort compared to the general population, with a  
22 difference of 10% at 24 months.  
23  
24  
25  
26  
27  
28  
29  
30  
31  
32  
33  
34  
35  
36  
37  
38

### 39 **Healthcare utilization**

40 Table 1 shows the level of healthcare utilization for all three cohorts during follow-up. The  
41 proportion of patients requiring medical care in the hospital setting at least once during follow-  
42 up was significantly higher in the uncontrolled severe asthmatic population versus both control  
43 populations.  
44  
45  
46  
47  
48  
49  
50  
51  
52  
53  
54  
55  
56  
57  
58  
59  
60

**Table 1. Comparison of the results for mortality and main healthcare use per patient during the 2-year follow-up**

|                                                                                        | Cohort of uncontrolled severe asthmatics (N=739) | General population cohort (N=2,217) | P-Value            | Asthmatic control cohort (n=739) | P-Value            |
|----------------------------------------------------------------------------------------|--------------------------------------------------|-------------------------------------|--------------------|----------------------------------|--------------------|
| <b>Deaths, n (%)</b>                                                                   | <b>59 (8.0)</b>                                  | <b>75 (3.4)</b>                     | <b>P&lt;0.0001</b> | <b>42 (5.7)</b>                  | <b>P=0.0747</b>    |
| <b>Deaths by age group, n (%)</b>                                                      |                                                  |                                     |                    |                                  |                    |
| <20                                                                                    | 0 (0.0)                                          | 0 (0.0)                             | P=0.0393           | 0 (0.0)                          | P=0.0366           |
| 20-<30                                                                                 | 0 (0.0)                                          | 1 (1.3)                             |                    | 0 (0.0)                          |                    |
| 30-<40                                                                                 | 0 (0.0)                                          | 1 (1.3)                             |                    | 0 (0.0)                          |                    |
| 40-<50                                                                                 | 0 (0.0)                                          | 1 (1.3)                             |                    | 0 (0.0)                          |                    |
| 50-<60                                                                                 | 6 (10.2)                                         | 1 (1.3)                             |                    | 1 (2.4)                          |                    |
| 60-<70                                                                                 | 15 (25.4)                                        | 11 (14.7)                           |                    | 3 (7.1)                          |                    |
| 70-<80                                                                                 | 14 (23.7)                                        | 16 (21.3)                           |                    | 10 (23.8)                        |                    |
| 80-<90                                                                                 | 15 (25.4)                                        | 20 (26.7)                           |                    | 16 (38.1)                        |                    |
| ≥90                                                                                    | 9 (15.3)                                         | 24 (32.0)                           |                    | 12 (28.6)                        |                    |
| <b>Mean age at death (σ)</b>                                                           | <b>76.1 (12.5)</b>                               | <b>79.7 (14.5)</b>                  |                    | P=0.0266                         |                    |
| Min-max                                                                                | 51.0-102.0                                       | 25.0-100.0                          | 55.0-102.0         |                                  | P=0.0266           |
| <b>At least 1 medical care act done at hospital, n (%)</b>                             | <b>478 (64.7)</b>                                | <b>774 (34.9)</b>                   | <b>P&lt;0.0001</b> | <b>408 (55.2)</b>                | <b>P=0.0002</b>    |
| ED visit                                                                               | 318 (43.0)                                       | 465 (21.0)                          | P<0.0001           | 247 (33.4)                       | P=0.0002           |
| All-cause hospitalization                                                              | 409 (55.3)                                       | 556 (25.1)                          | P<0.0001           | 349 (47.2)                       | P=0.0023           |
| Asthma-related hospitalizations (asthma and severe exacerbation) <sup>a</sup>          | 27 (3.7)                                         | 0 (0.0)                             | NA                 | 12 (1.6)                         | P=0.0163           |
| Asthma-related hospitalizations with at least 1 visit in intensive care unit           | 3 (0.4)                                          | 0 (0.0)                             | NA                 | 1 (0.1)                          | 0.3173             |
| <b>At least 1 medical visit during follow-up, n (%)</b>                                | <b>708 (95.8)</b>                                | <b>1,995 (90.0)</b>                 | <b>P&lt;0.0001</b> | <b>709 (95.9)</b>                | <b>P=0.8981</b>    |
| General practitioner                                                                   | 602 (81.5)                                       | 1,628 (73.4)                        | P<0.0001           | 620 (83.9)                       | P=0.2185           |
| Respiratory specialist                                                                 | 94 (12.7)                                        | 53 (2.4)                            | P<0.0001           | 42 (5.7)                         | P<0.0001           |
| Ear-nose-throat specialist                                                             | 67 (9.1)                                         | 122 (5.5)                           | P<0.0001           | 37 (5.0)                         | P=0.0030           |
| <b>At least 1 paramedical visit during follow-up, n (%)</b>                            | <b>600 (81.2)</b>                                | <b>1,390 (62.7)</b>                 | <b>P&lt;0.0001</b> | <b>546 (73.9)</b>                | <b>P=0.0011</b>    |
| Nurse consultation                                                                     | 531 (71.9)                                       | 1,184 (53.4)                        | P<0.0001           | 496 (66.7)                       | P=0.0353           |
| Physiotherapy consultation                                                             | 320 (43.3)                                       | 673 (30.4)                          | P<0.0001           | 259 (35.0)                       | P=0.0013           |
| <b>At least 1 filled prescription for an asthma medication during follow-up, n (%)</b> | <b>726 (98.2)</b>                                | <b>257 (11.6)</b>                   | <b>P&lt;0.0001</b> | <b>638 (86.3)</b>                | <b>P&lt;0.0001</b> |
| Short-acting bronchodilator                                                            | 606 (82.0)                                       | 100 (4.5)                           | P<0.0001           | 396 (53.6)                       | P<0.0001           |
| Long-acting bronchodilator: LAMA/LABA                                                  | 316 (42.8)                                       | 53 (2.4)                            | P=0.0004           | 190 (25.7)                       | P<0.0001           |
| Long-acting bronchodilator: xanthines                                                  | 56 (7.6)                                         | 2 (0.1)                             | P<0.0001           | 10 (1.4)                         | P<0.0001           |
| Anti-inflammatory medication (ICS ± OCS)                                               | 506 (68.5)                                       | 115 (5.2)                           | P<0.0001           | 273 (36.9)                       | P<0.0001           |
| Anti-inflammatory medication (ICS ± OCS) and long-acting bronchodilator                | 626 (84.7)                                       | 128 (5.8)                           | P<0.0001           | 413 (55.9)                       | P<0.0001           |

|                                                                                                                                         | Cohort of uncontrolled severe asthmatics (N=739) | General population cohort (N=2,217) | P-Value                   | Asthmatic control cohort (n=739) | P-Value                   |
|-----------------------------------------------------------------------------------------------------------------------------------------|--------------------------------------------------|-------------------------------------|---------------------------|----------------------------------|---------------------------|
| At least 1 visit to a GP, respiratory specialist, or allergy specialist, followed within 10 days by a filled prescription of OCS, n (%) | 481 (65.1)                                       | 447 (20.2)                          | <i>P</i> <0.0001          | 229 (31.0)                       | <i>P</i> <0.0001          |
| At least 1 filled prescription of a medication of interest during follow-up, n (%)                                                      | <b>727 (98.4)</b>                                | <b>1,847 (83.3)</b>                 | <b><i>P</i>&lt;0.0001</b> | <b>678 (91.7)</b>                | <b><i>P</i>&lt;0.0001</b> |
| Intranasal antihistamines                                                                                                               | 22 (3.0)                                         | 13 (0.6)                            | <i>P</i> <0.0001          | 10 (1.4)                         | <i>P</i> =0.0339          |
| Ocular antihistamines                                                                                                                   | 43 (5.8)                                         | 80 (3.6)                            | <i>P</i> =0.0004          | 27 (3.7)                         | <i>P</i> =0.0523          |
| Systemic antihistamines                                                                                                                 | 488 (66.0)                                       | 675 (30.4)                          | <i>P</i> <0.0001          | 273 (36.9)                       | <i>P</i> <0.0001          |
| Intranasal corticosteroids                                                                                                              | 420 (56.8)                                       | 567 (25.6)                          | <i>P</i> <0.0001          | 230 (31.1)                       | <i>P</i> <0.0001          |
| Nonsteroidal anti-inflammatory drugs                                                                                                    | 407 (55.1)                                       | 1,083 (48.8)                        | <i>P</i> <0.0001          | 317 (42.9)                       | <i>P</i> <0.0001          |
| Antibiotics                                                                                                                             | 670 (90.7)                                       | 1,323 (59.7)                        | <i>P</i> <0.0001          | 501 (67.8)                       | <i>P</i> <0.0001          |
| Proton-pump inhibitors                                                                                                                  | 506 (68.5)                                       | 980 (44.2)                          | <i>P</i> <0.0001          | 348 (47.1)                       | <i>P</i> <0.0001          |
| Psychotropic drugs                                                                                                                      | 426 (57.6)                                       | 840 (37.9)                          | <i>P</i> <0.0001          | 320 (43.3)                       | <i>P</i> <0.0001          |
| Topical corticosteroids                                                                                                                 | 235 (31.8)                                       | 512 (23.1)                          | <i>P</i> <0.0001          | 145 (19.6)                       | <i>P</i> <0.0001          |
| Topical immunosuppressants                                                                                                              | 2 (0.3%)                                         | 1 (0.0)                             | <i>P</i> =0.0588          | 0 (0.0%)                         | NA                        |

<sup>a</sup> Excluding stays of less than 1 night (or Z codes).

Key: ED – emergency department; GP – general practitioner; ICS – inhaled corticosteroid; LABA – long-acting  $\beta$ 2-agonist; LAMA – long-acting muscarinic antagonist; NA – not applicable; OCS – oral corticosteroid.

1  
2  
3 A 2-fold increase in ED visits and all-cause or asthma-related hospitalizations was observed  
4 for patients with uncontrolled severe asthma compared with the general population  
5 (64.7% vs. 34.9%;  $P<0.0001$ ). These patients also had a statistically significant increased use  
6 of other main components of care, such as medical visits (95.8% vs. 90.0%;  $P<0.0001$ ) and  
7 paramedical visits (81.2% vs. 62.7%;  $P<0.0001$ ). A statistically significant increase was also  
8 seen for the healthcare utilization comparison with the asthmatic cohort, where patients with  
9 uncontrolled severe asthma also had more ED visits and hospitalizations (64.7% vs. 55.2%;  
10  $P=0.0002$ ) and paramedical visits (81.2% vs. 73.9%;  $P=0.0011$ ).  
11  
12  
13  
14  
15  
16  
17  
18  
19  
20

21 For drug prescriptions, the proportion of patients receiving medications overall was higher in  
22 patients with uncontrolled severe asthma compared to matched individuals from the general  
23 population cohort, both in terms of asthma-related treatments, inclusive of oral corticosteroid  
24 therapy (98.2% vs. 11.6%;  $P<0.0001$ ), and other treatments, such as antibiotics, nonsteroidal  
25 anti-inflammatory drugs, and psychotropic drugs (98.4% vs. 83.3%;  $P<0.0001$ ). Patients with  
26 uncontrolled severe asthma also had significantly higher medication use than the asthmatic  
27 controls both for asthma-related treatments (98.2% vs. 86.3%;  $P<0.0001$ ) and other  
28 medications (98.4% vs. 91.7%;  $P<0.0001$ ).  
29  
30  
31  
32  
33  
34  
35  
36  
37  
38

### 39 **Costs**

40 Healthcare use increases translated into higher costs. Mean costs associated with healthcare  
41 utilization during the 2-year follow-up were significantly higher for patients with uncontrolled  
42 severe asthma (€14,020) compared to the general population (€3,564;  $P<0.0001$ ) or asthmatic  
43 controls (€6,418;  $P<0.0001$ ), regardless of the expenditure (Table 2).  
44  
45  
46  
47  
48  
49  
50  
51  
52  
53  
54  
55  
56  
57  
58  
59  
60

**Table 2. Comparison of costs (reimbursement amounts, in Euros) associated with hospital and outpatient use, per patient, over a 2-year period after the index date (patients with uncontrolled severe asthma vs. general population and asthmatic control cohorts)**

|                                  |                                   | <b>Cohort of patients with uncontrolled severe asthma (N=739)</b> | <b>General population cohort (N=2,217)</b> | <b>P-Value</b>   | <b>Asthmatic control cohort (n=739)</b> | <b>P-Value</b>   |
|----------------------------------|-----------------------------------|-------------------------------------------------------------------|--------------------------------------------|------------------|-----------------------------------------|------------------|
| Hospitalization                  | Mean ( $\sigma$ )                 | 8,163 (20,669)                                                    | 1,800 (7,991)                              | <i>P</i> <0.0001 | 3,589 (13,702)                          | <i>P</i> <0.0001 |
|                                  | Median                            | 425.91(0.00-5,854)                                                | 0.00 (0.00-0.00)                           |                  | 0.00 (0.00-1,284)                       |                  |
|                                  | Min-max                           | 0.00-246,483                                                      | 0.00-176,423                               |                  | 0.00-190,456.80                         |                  |
| ED visit without hospitalization | Mean ( $\sigma$ )                 | 12.47 (27.74)                                                     | 6.16 (17.76)                               | <i>P</i> <0.0001 | 9.40 (33.03)                            | <i>P</i> <0.0001 |
|                                  | Median (Q1-Q3)                    | 0.00 (0.00-24.86)                                                 | 0.00 (0.00-0.00)                           |                  | 0.00 (0.00-0.00)                        |                  |
|                                  | Min-max                           | 0.00-319.21                                                       | 0.00-273.42                                |                  | 0.00-671.13                             |                  |
| Medical visits                   | Mean ( $\sigma$ )                 | 643.02 (1,068)                                                    | 367.57 (437.39)                            | <i>P</i> <0.0001 | 496.15 (657.70)                         | <i>P</i> <0.0001 |
|                                  | Median (Q1-Q3)                    | 491.39 (278.42-785.97)                                            | 265.02 (113.30-498.51)                     |                  | 376.35 (216.72-611.98)                  |                  |
|                                  | Min-max                           | 0.00-24,882                                                       | 0.00-6,861                                 |                  | 0.00-11,547                             |                  |
| Laboratory tests                 | Mean ( $\sigma$ )                 | 240.95 (321.20)                                                   | 153.74 (265.85)                            | <i>P</i> <0.0001 | 203.48 (285.37)                         | <i>P</i> =0.0131 |
|                                  | Median (Q1-Q3)                    | 145.14 (52.73-295.49)                                             | 85.23 (0.00-179.93)                        |                  | 126.25 (54.32-236.76)                   |                  |
|                                  | Min-max                           | 0.00-3,137                                                        | 0.00-5,727                                 |                  | 0.00-2,461                              |                  |
| Paramedical visits               | Mean ( $\sigma$ )                 | 1,406 (4,827)                                                     | 746.87 (2,986.03)                          | <i>P</i> <0.0001 | 968.41 (3,236.10)                       | <i>P</i> <0.0001 |
|                                  | Median (Q1-Q3)                    | 176.08 (11.98-689.00)                                             | 17.97 (0.00-288.02)                        |                  | 42.48 (0.00-468.70)                     |                  |
|                                  | Min-max                           | 0.00-65,527                                                       | 0.00-50,060                                |                  | 0.00-36,145                             |                  |
| Medications                      | Mean ( $\sigma$ )                 | 3,076 (9,131.20)                                                  | 199.49 (409.72)                            | <i>P</i> <0.0001 | 721.35 (747.43)                         | <i>P</i> <0.0001 |
|                                  | Median (Q1-Q3)                    | 1,525 (1,037-2,185)                                               | 58.38 (11.84-220.45)                       |                  | 523.35 (246.07-957.22)                  |                  |
|                                  | Min-max                           | 0.00-95,453                                                       | 0.00-5,855                                 |                  | 0.00-9,472                              |                  |
| <b>Total costs</b>               | <b>Mean (<math>\sigma</math>)</b> | <b>14,020 (24,076)</b>                                            | <b>3,564 (9,540)</b>                       | <i>P</i> <0.0001 | <b>6,418 (15,109)</b>                   | <i>P</i> <0.0001 |
|                                  | <b>Median (Q1-Q3)</b>             | <b>4,624.70 (2,492-13,897)</b>                                    | <b>824.75 (297.00-2,286)</b>               |                  | <b>1,904.82 (1,020-4,906)</b>           |                  |
|                                  | <b>Min-max</b>                    | <b>105.03-253,160</b>                                             | <b>0.00-190,380</b>                        |                  | <b>0.00-193,294</b>                     |                  |

Key: ED – emergency department.

1  
2  
3 The average cost of a patient with uncontrolled severe asthma who died was significantly  
4 higher than that of a surviving patient (€28,009 vs. €11,850.60;  $P<0.0001$ ). Primary drivers of  
5 this increase in patients with uncontrolled severe asthma were hospitalizations (5-fold and 2-  
6 fold increases vs. the general and asthmatic populations, respectively), drugs of interest (16-  
7 fold and 4-fold increases vs. the general and asthmatic populations, respectively), and  
8 paramedical fees (2-fold and 1.4-fold increases vs. the general and asthmatic populations,  
9 respectively).  
10  
11  
12  
13  
14  
15  
16  
17  
18  
19  
20  
21  
22  
23  
24  
25  
26  
27  
28  
29  
30  
31  
32  
33  
34  
35  
36  
37  
38  
39  
40  
41  
42  
43  
44  
45  
46  
47  
48  
49  
50  
51  
52  
53  
54  
55  
56  
57  
58  
59  
60

For peer review only



## DISCUSSION

Given the lack of recent data quantifying impact of uncontrolled severe asthma on public health, the RESONANCE study provided important data characterizing this population and comparing it to the general and asthmatic populations in terms of morbidity and mortality as well as healthcare use and associated costs. This is the first study to specifically compare patients with uncontrolled severe asthma with the overall asthmatic population, in the French population.

The clinical burden of uncontrolled severe asthma was demonstrated through the increased risk of mortality, use of additional treatments (asthma-related treatment and other associated treatments), and hospitalizations during the 2-year follow-up period in comparison with matched patients from the general and asthmatic populations. The average costs of uncontrolled severe asthma to the healthcare system during the 2 years of follow-up represented nearly 4 times that of matched patients from the general population over the same period (difference of €10,456 per patient). This amounts to an increase of 293% in costs—more than twice that of matched asthmatic controls—in whom an increase of 118% in costs was seen over 2 years (difference of €7,601 per patient with the general population). *Bourdin et al.* found an incremental cost of \$5,276 to the healthcare system annually when comparing patients with severe asthma to the general population, although a 2-year extrapolation would be biased due to the non-annual rate of care seeking in the study population.[12] However, no specific assessment of uncontrolled severe asthma was performed.

Hospitalizations were the main driver of healthcare use and costs, in line with other studies assessing the economic burden of asthma.[4,7,14] Costs during follow-up could have been influenced by the cost of hospitalization occurring at index date, since it was part of the selection criteria, given its connection with asthma non-control; however, the influence of this phenomenon was limited, as only 5.1% of patients were selected based solely on this criterion.

1  
2  
3 This study highlighted the excess healthcare costs during the last months of life in uncontrolled  
4 severe asthma, accounting for part of the excess cost associated with this condition overall,  
5 given their excess mortality rate during the follow-up period.  
6  
7  
8

9  
10 Our study also assessed the size of the uncontrolled severe patient population. The 739  
11 patients identified among the total population of 16,588 patients with asthma suggest that this  
12 small but high-risk population represents 4.5% of all patients with asthma in France in 2014.  
13  
14 When extrapolating to the entire adolescent and adult French population, this represents a  
15 prevalence of 0.15% (*i.e.*, 86,342 patients; 95% CI: 80,341, 92,789), which is slightly lower  
16 than other severe asthma populational estimates that used different definitions of asthma  
17 severity and did not account for asthma non-control.[12,15]  
18  
19  
20  
21  
22  
23  
24  
25

26 The uncontrolled severe asthmatic population was identified by means of a comprehensive  
27 algorithm, where great care was placed in the definitions of asthma, severity, and control to  
28 ensure the accuracy of the cohorts and palliate the lack of clinical data and use of a single  
29 marker, allowing identification of this unique population. Asthma was defined with robust data,  
30 such as asthma-related hospitalizations and complications, asthma-related full coverage for a  
31 long-term condition (ALD), and specific treatments.  
32  
33  
34  
35  
36  
37  
38  
39

40 Two cohorts were compared to patients with uncontrolled severe asthma. The objective of the  
41 general population control cohort was to highlight the absolute burden of uncontrolled severe  
42 asthma in the population. Matching on key sociodemographic characteristics aimed to control  
43 for potential confounding bias and ensure comparability of the populations, which was  
44 confirmed by standardized differences. In addition, a Cox regression model was developed  
45 post-hoc to compare mortality risk between the uncontrolled severe asthmatic cohort and the  
46 general population: impact of uncontrolled severe asthma on mortality was higher in patients  
47 without history of psychiatric disease compared to patients with history of psychiatric disease.  
48  
49  
50  
51  
52  
53  
54  
55  
56  
57  
58  
59  
60

1  
2  
3 The asthmatic control cohort was selected and matched to patients with uncontrolled severe  
4 asthma using propensity scores to control potential confounding factors using all available and  
5 relevant variables. A conservative approach was used, since some potential confounders  
6 included in propensity scores may be preponderant in patients with uncontrolled severe  
7 asthma, leading to a potential minimization of the burden of asthma lack of control and  
8 severity. More, given that this control population includes severe but controlled or non-  
9 controlled but non-severe patients with asthma, it is not a population exclusively comprising  
10 low-risk patients.  
11  
12  
13  
14  
15  
16  
17  
18  
19  
20

21 The study was conducted using the EGB, a well-recognized and robust populational medical  
22 administrative database that confers many advantages, such as the completeness of mortality  
23 data and comprehensiveness of healthcare reimbursed for all patients. Of note, the EGB does  
24 not include clinical information such as visit reason, diagnoses made outside hospitals,  
25 biological test results, or patients' anthropometric data.  
26  
27  
28  
29  
30  
31

32 The challenges associated with the use of administrative databases have been well  
33 documented. [16] In this study, the difficulties in selecting the patients with uncontrolled severe  
34 asthma were associated with potential measurement bias related to coding errors in hospital  
35 diagnoses; this source of error is likely limited and non-differential between groups. The  
36 algorithms assumed that filled prescriptions were proxies to treatment use; however, it is not  
37 possible to confirm that a filled prescription has been taken.  
38  
39  
40  
41  
42  
43  
44  
45

46 Potential indications of asthma treatments for other chronic pulmonary diseases such as  
47 COPD were accounted for, since an exclusion criterion based on ALD declarations or  
48 hospitalizations related to other chronic pulmonary diseases was considered. Despite this,  
49 some COPD patients may still have been included given the relatively old age of the asthmatic  
50 cohorts. It would occurred if ALD for COPD has not been declared, or if a patient has never  
51 been hospitalized during the last 5 years. Criterion requiring continuous insurance coverage  
52 may have resulted in a lower number of younger patients being included due to student-  
53  
54  
55  
56  
57  
58  
59  
60

1  
2  
3 specific insurance offered during school years; however, the impact of this limitation on the  
4 results is likely minimal.  
5  
6

7  
8 Patients have been assigned to their group of interest (uncontrolled severe asthma, other  
9 patients with asthma, general population) at index date. Some patients may have evolved from  
10 non-asthma to asthma, or from asthma to uncontrolled severe asthma during follow-up and  
11 this was not considered in statistical analyses. However, given the duration of follow-up of two  
12 years, impact of such misclassification of patients during follow-up is probably limited.  
13  
14  
15  
16  
17

18  
19 The EGB offers the advantage of a limited number of patients lost to follow-up given the  
20 universal healthcare system present in France. It also has a few limitations: while most  
21 patients were covered by the general scheme, patients covered by other plans may not have  
22 been selected due to the later integration of those plans in the EGB. Also, the algorithm used  
23 to define asthma and index date excluded patients who died at the hospital around the time of  
24 the index date, thereby potentially excluding the most severe and uncontrolled patients.  
25  
26  
27  
28  
29  
30  
31  
32  
33 Finally, additional residual confounding factors may persist despite the matching process.  
34

35  
36 This large study allowing the comparison between patients with uncontrolled severe asthma  
37 and other patients with asthma and the general population, highlighted that severe asthma  
38 associated with non-control significantly affects mortality, healthcare use, and associated  
39 costs. This emphasized that close attention should be paid to ensure appropriate management  
40 of patients with severe asthma and monitoring of the level of control of asthma symptoms.  
41  
42  
43  
44  
45  
46  
47  
48  
49  
50  
51  
52  
53  
54  
55  
56  
57  
58  
59  
60

## CONCLUSIONS

This database study demonstrates the huge burden of uncontrolled severe asthma in terms of mortality, morbidity, and healthcare resource consumption compared to other patients with asthma and the general population. These findings emphasize the importance of appropriate management in this high-risk population.

For peer review only

1  
2  
3 **Acknowledgments** The authors gratefully acknowledge the assistance of Anaïs Havet,  
4 (PharmD, PhD) and Lucile Dheyriat (PharmD), of **stève** consultants for assistance in drafting  
5 of this manuscript, which was funded by Sanofi.  
6  
7  
8  
9

10 **Contributors** All authors participated in the interpretation of the data, provided critical  
11 feedback and final approval for submission, and took responsibility for the accuracy,  
12 completeness, and protocol adherence of data and analyses. Stève Bénard had full access to  
13 all of the data in the study and takes responsibility for the integrity of the data and the accuracy  
14 of the data analysis.  
15  
16  
17

18 *Concept and design:* all authors

19 *Acquisition, analysis, or interpretation of data:* all authors

20 *Drafting of the manuscript:* de Larrard and Bénard

21 *Critical revision of the manuscript for important intellectual content:* Roche, Demoly,  
22 Garcia, Cancalon, Perez, Mahieu and Vieu

23 *Statistical analysis:* de Larrard, Bénard and Cancalon

24 *Administrative, technical, or material support:* Bénard, Perez, Mahieu and Vieu

25 *Supervision:* all authors  
26  
27  
28  
29  
30  
31  
32

33 **Funding** This work was supported by Sanofi-Aventis France.  
34  
35

36 **Competing interests** Pr Pascal Demoly has received honoraria and/or research grants from  
37 ALK, Mylan-Viatrix, Stallergènes, ThermoFisher Scientific, AstraZeneca, GSK, Novartis,  
38 Ménarini, and Regeneron.  
39

40 Pr Gilles Garcia has received honoraria from ALK, Novartis, AstraZeneca, GSK, Sanofi and  
41 Chiesi for conferences or advisory board meetings.  
42

43 Pr Nicolas Roche has received research funding from Boehringer Ingelheim, GSK, Pfizer and  
44 Novartis and honoraria from Boehringer Ingelheim, Pfizer, Novartis, Teva, GSK, AstraZeneca,  
45 Chiesi, Sanofi, and Zambon.  
46  
47

48 No other disclosures were reported.

49 Laurine Vieu, Aymeric Mahieu, Vincent Perez are Sanofi employee and may hold shares  
50 and/or stock options in the company.  
51  
52  
53  
54

55 **Patient consent for publication** Not required.  
56  
57

58 **Data Availability Statement** No additional data available.  
59  
60

## REFERENCES

- 1 Busse WW, Banks-Schlegel S, Wenzel SE. Pathophysiology of severe asthma. *J Allergy Clin Immunol* 2000;106:1033–42. doi:10.1067/mai.2000.111307
- 2 Israel E, Reddel HK. Severe and Difficult-to-Treat Asthma in Adults. *N Engl J Med* 2017;377:965–76. doi:10.1056/NEJMra1608969
- 3 Yaghoubi M, Adibi A, Safari A, *et al.* The Projected Economic and Health Burden of Uncontrolled Asthma in the United States. *Am J Respir Crit Care Med* 2019;200:1102–12. doi:10.1164/rccm.201901-0016OC
- 4 O'Neill S, Sweeney J, Patterson CC, *et al.* The cost of treating severe refractory asthma in the UK: an economic analysis from the British Thoracic Society Difficult Asthma Registry. *Thorax* 2015;70:376–8. doi:10.1136/thoraxjnl-2013-204114
- 5 Godard P, Chanez P, Siraudin L, *et al.* Costs of asthma are correlated with severity: a 1-yr prospective study. *Eur Respir J* 2002;19:61–7. doi:10.1183/09031936.02.00232001
- 6 Chastek B, Korrer S, Nagar SP, *et al.* Economic Burden of Illness Among Patients with Severe Asthma in a Managed Care Setting. *J Manag Care Spec Pharm* 2016;22:848–61. doi:10.18553/jmcp.2016.22.7.848
- 7 Bahadori K, Doyle-Waters MM, Marra C, *et al.* Economic burden of asthma: a systematic review. *BMC Pulm Med* 2009;9:24. doi:10.1186/1471-2466-9-24
- 8 Moulis G, Lapeyre-Mestre M, Palmaro A, *et al.* French health insurance databases: What interest for medical research? *Rev Med Interne* 2015;36:411–7. doi:10.1016/j.revmed.2014.11.009
- 9 Bezin J, Duong M, Lassalle R, *et al.* The national healthcare system claims databases in France, SNIIRAM and EGB: Powerful tools for pharmacoepidemiology. *Pharmacoepidemiol Drug Saf* 2017;26:954–62. doi:10.1002/pds.4233
- 10 Catherine Quantin and Caisse nationale d'Assurance maladie des travailleurs salariés (CNAMTS). Etude des algorithmes de définition de pathologies dans le système national d'information inter-régimes de l'assurance maladie (SNIIRAM). Deuxième partie: Recensement des équipes utilisant les données du SNIIRAM, ainsi que des algorithmes d'identification de pathologies et des travaux publiés. Aug 2015. [https://assurance-maladie.ameli.fr/sites/default/files/2014\\_etude-algorithmes-definition-pathologies-partie-2\\_cartographie.pdf](https://assurance-maladie.ameli.fr/sites/default/files/2014_etude-algorithmes-definition-pathologies-partie-2_cartographie.pdf). Accessed November, 2021.
- 11 Catherine Quantin and Caisse nationale d'Assurance maladie des travailleurs salariés (CNAMTS). Etude des algorithmes de définition de pathologies dans le système national d'information inter-régimes de l'assurance maladie (SNIIRAM). Première partie: Les algorithmes d'identification de pathologies utilisés par la cartographie des patients et des dépenses, développée par la Caisse nationale de l'Assurance maladie des travailleurs salariés. Aug 2015. [https://assurance-maladie.ameli.fr/sites/default/files/2014\\_etude-algorithmes-definition-pathologies-partie-1\\_cartographie.pdf](https://assurance-maladie.ameli.fr/sites/default/files/2014_etude-algorithmes-definition-pathologies-partie-1_cartographie.pdf). Accessed November, 2021.
- 12 Bourdin A, Fabry-Vendrand C, Ostinelli J, *et al.* The Burden of Severe Asthma in France: A Case-Control Study Using a Medical Claims Database. *J Allergy Clin Immunol Pract* 2019;7:1477–87. doi:10.1016/j.jaip.2018.12.029
- 13 Global Initiative for Asthma. 2018 GINA Report: Global Strategy for Asthma Management and Prevention; pp.35-88. <https://ginasthma.org/wp-content/uploads/2018/04/wms-GINA-2018-report-V1.3-002.pdf>. Accessed November, 2021.

1  
2  
3 14 Jalaludin BB, Smith MA, Chey T, *et al.* Risk factors for asthma deaths: a population-  
4 based, case-control study. *Aust N Z J Public Health* 1999;23:595–600. doi:10.1111/j.1467-  
5 842x.1999.tb01543.x

6  
7 15 Enquête Santé et Protection Sociale (ESPS). Corrélations entre asthme déclaré et  
8 remboursements de médicaments dans l'enquête ESPS 2006. 2012.  
9 [https://www.santepubliquefrance.fr/maladies-et-traumatismes/maladies-et-infections-](https://www.santepubliquefrance.fr/maladies-et-traumatismes/maladies-et-infections-respiratoires/asthme/documents/rapport-synthese/correlations-entre-asthme-declare-et-remboursements-de-medicaments-dans-l-enquete-esps-2006.-peut-on-proposer-des-indicateurs-de-suivi-de-la-prise)  
10 [respiratoires/asthme/documents/rapport-synthese/correlations-entre-asthme-declare-et-](https://www.santepubliquefrance.fr/maladies-et-traumatismes/maladies-et-infections-respiratoires/asthme/documents/rapport-synthese/correlations-entre-asthme-declare-et-remboursements-de-medicaments-dans-l-enquete-esps-2006.-peut-on-proposer-des-indicateurs-de-suivi-de-la-prise)  
11 [remboursements-de-medicaments-dans-l-enquete-esps-2006.-peut-on-proposer-des-](https://www.santepubliquefrance.fr/maladies-et-traumatismes/maladies-et-infections-respiratoires/asthme/documents/rapport-synthese/correlations-entre-asthme-declare-et-remboursements-de-medicaments-dans-l-enquete-esps-2006.-peut-on-proposer-des-indicateurs-de-suivi-de-la-prise)  
12 [indicateurs-de-suivi-de-la-prise](https://www.santepubliquefrance.fr/maladies-et-traumatismes/maladies-et-infections-respiratoires/asthme/documents/rapport-synthese/correlations-entre-asthme-declare-et-remboursements-de-medicaments-dans-l-enquete-esps-2006.-peut-on-proposer-des-indicateurs-de-suivi-de-la-prise). Accessed November, 2021.

13  
14 16 Jacob C, Haas JS, Bechtel B, *et al.* Assessing asthma severity based on claims data:  
15 a systematic review. *Eur J Health Econ* 2017;18:227–41. doi:10.1007/s10198-016-0769-2.  
16  
17  
18  
19  
20  
21  
22  
23  
24  
25  
26  
27  
28  
29  
30  
31  
32  
33  
34  
35  
36  
37  
38  
39  
40  
41  
42  
43  
44  
45  
46  
47  
48  
49  
50  
51  
52  
53  
54  
55  
56  
57  
58  
59  
60

For peer review only



## LIST OF FIGURE TITLES AND LEGENDS

FIGURE 1. RESONANCE study design

FIGURE 2. 24-month survival for the uncontrolled severe asthmatic cohort vs. general population and asthmatic control cohorts

For peer review only

1  
2  
3  
4  
5  
6  
7  
8  
9  
10  
11  
12  
13  
14  
15  
16  
17  
18  
19  
20  
21  
22  
23  
24  
25  
26  
27  
28  
29  
30  
31  
32  
33  
34  
35  
36  
37  
38  
39  
40  
41  
42  
43  
44  
45  
46  
47  
48  
49  
50  
51  
52  
53  
54  
55  
56  
57  
58  
59  
60



FIGURE 1. RESONANCE study design  
286x137mm (300 x 300 DPI)

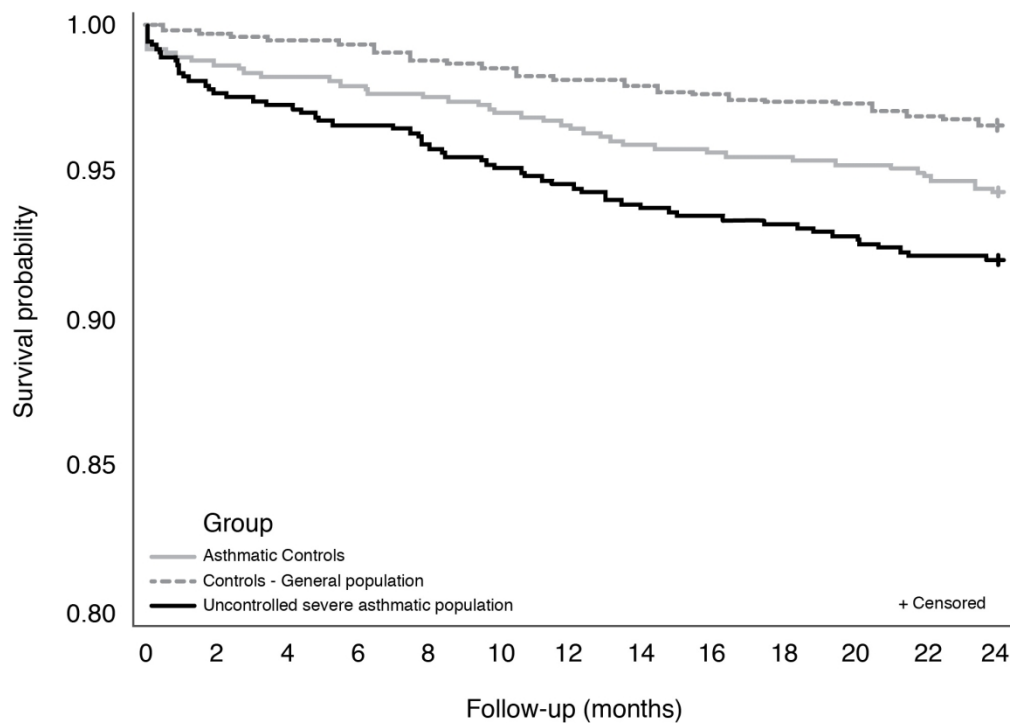

FIGURE 2. 24-month survival for the uncontrolled severe asthmatic cohort vs. general population and asthmatic control cohorts

166x119mm (300 x 300 DPI)

## Real-life impact of uncontrolled severe asthma on mortality and healthcare use in adolescents and adults: findings from the retrospective observational RESONANCE study in France

Nicolas Roche<sup>1</sup>, Gilles Garcia<sup>2</sup>, Alexandre de Larrard<sup>3</sup>, Charlotte Cancalon<sup>3</sup>, Stève Bénard<sup>3</sup>, Vincent Perez<sup>4</sup>, Aymeric Mahieu<sup>4</sup>, Laurine Vieu<sup>4</sup>, Pascal Demoly<sup>5</sup>

### Supplementary materials

#### FIGURE S1. Patient selection algorithm

Key: ALD – affection de longue durée (long-term condition); ATC – Anatomical Therapeutic Chemical; COPD – chronic obstructive pulmonary disease; ICD-10 – International Classification of Diseases, 10th Revision; ICS – inhaled corticosteroid; LABA – long-acting  $\beta$ 2-agonist; LAMA – long-acting muscarinic antagonist; OCS – oral corticosteroid; SABA – short-acting  $\beta$ 2-agonist.

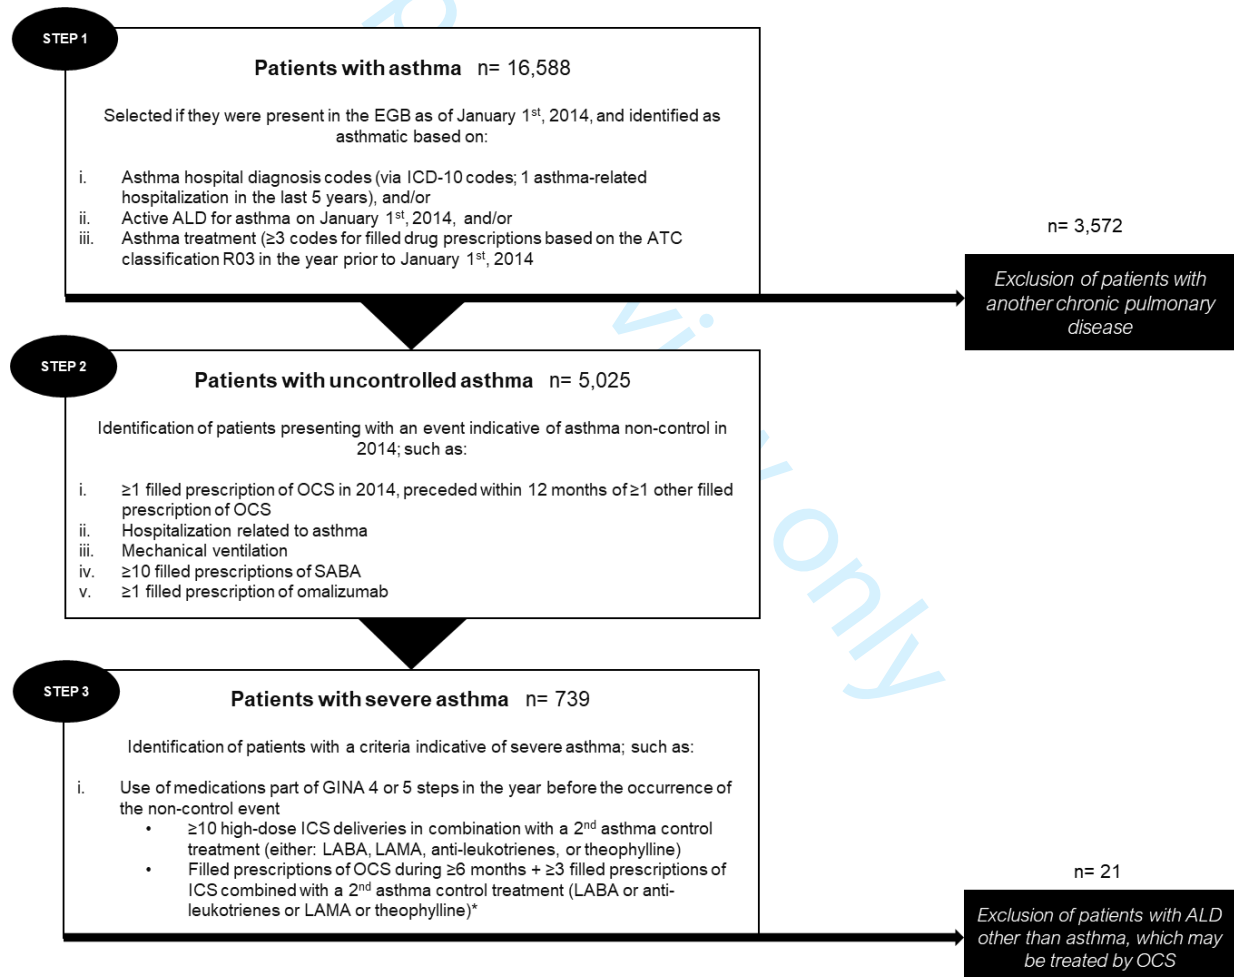

#### Footnote:

\* Of note, these criteria did not apply to patients with an ALD other than asthma (i.e. rheumatoid arthritis, ulcerative colitis, Crohn's disease, cancer, etc) who can be treated by OCS identified by an exploratory analysis of ALD of patients from the target population meeting criterion.

## Methods – Additional details on drugs of interest

### Asthma treatments:

- short-acting beta2-agonists (SABA),
- long-acting beta2-agonists (LABA),
- long-acting anticholinergics (LAMA),
- antileukotriene receptor antagonists (LTRA),
- xanthines,
- inhaled and oral corticosteroids (ICS and OCS),
- combination treatments.

### Other drug classes of interest:

- nasal antihistamines,
- antihistamines,
- nonsteroidal anti-inflammatory drugs (NSAIDs),
- antibiotics,
- proton pump inhibitors (PPIs),
- psychotropic drugs,
- topical corticosteroids,
- topical immunosuppressants.

## Methods – ICD-10 codes used

### For Asthma definition

- J45.0 Predominantly allergic asthma
- J45.1 Non-allergic asthma
- J45.8 Mixed asthma
- J45.9 Asthma, Unspecified
- J46 Status asthmaticus
- J96 Respiratory failure, not elsewhere classified

### For Other chronic pulmonary disease definition

- J41 Simple and mucopurulent chronic bronchitis
- J42 Unspecified chronic bronchitis
- J43 Emphysema
- J44 Other chronic obstructive pulmonary disease
- J47 Bronchiectasis
- J61 Pneumoconiosis due to asbestos and other mineral fiber
- J62.8 Pneumoconiosis due to other dust containing silica
- J68.0 Bronchitis due to chemicals, gases, fumes and vapors
- E84 Mucoviscidosis
- J92.0 Pleural plaque with presence of asbestos
- J94.8 Other specified pleural conditions
- J96.1+0 Insuffisance respiratoire chronique obstructive

**Methods – Variables defined for propensity score matching**

1. nasal corticosteroid (Yes/No)
2. systemic antihistamine (Yes/No)
3. non-steroidal anti-inflammatory drugs (Yes/No)
4. antibiotic (Yes/No)
5. proton pump inhibitor (Yes/No)
6. dermocorticoids (Yes/No)
7. psychotropic drug (Yes/No)
8. age (years)
9. number of outpatient consultations
10. charlson's score
11. consultation with a nurse (Yes/No)
12. cardio-vascular diseases (Yes/No)
13. ocular antihistamine (Yes/No)
14. hypertension (Yes/No)
15. osteoporosis (Yes/No)
16. number of consultations with a physiotherapist
17. consultations with a physiotherapist (Yes/No)
18. depression (Yes/No)
19. psychiatric illness (Yes/No)
20. number of emergency room visits
21. hospitalization (Yes/No)
22. number of consultations with a nurse
23. emergency room visits (Yes/No)
24. number of hospitalizations
25. nasal antihistamine (Yes/No)
26. cataract (Yes/No)
27. nasal polyposis (Yes/No)
28. number of hospital consultations
29. gastroesophageal reflux (Yes/No)
30. dyslipidemia (Yes/No)
31. arrhythmia (Yes/No)
32. hospital consultations (Yes/No)
33. cerebrovascular diseases (Yes/No)
34. anxiety (Yes/No)
35. rhinosinusitis (Yes/No)
36. heart failure (Yes/No)
37. diabetes (Yes/No)
38. coronary heart disease (Yes/No)
39. sex
40. psychotic disorders (Yes/No)
41. outpatient consultation (Yes/No)
42. topical immunosuppressant (Yes/No)
43. CMU (Yes/No)
44. myocardial infarction (Yes/No)
45. atopic dermatitis (Yes/No)

**TABLE S1. Quality of direct matching between cohort of patients with uncontrolled severe asthma and general population**

| Matching variables          | Before Matching                           |                                |                               | After Matching                            |                              |                                |
|-----------------------------|-------------------------------------------|--------------------------------|-------------------------------|-------------------------------------------|------------------------------|--------------------------------|
|                             | Uncontrolled severe asthma cohort (n=739) | General population (n=466,977) | Standardized mean differences | Uncontrolled severe asthma cohort (n=739) | General population (n=2,217) | Standardized mean differences* |
| Age (mean, SD)              | 62.0 (16.7)                               | 48.5 (20.2)                    | 0.7297                        | 62.0 (16.7)                               | 62.0 (16.7)                  | 0.0000                         |
| Sex                         |                                           |                                |                               |                                           |                              |                                |
| Male (n, %)                 | 318 (43.0%)                               | 228 841 (49.0%)                | 0.1201                        | 318 (43.0%)                               | 954 (43.0%)                  | 0.0000                         |
| Female (n, %)               | 421 (57.0%)                               | 238 136 (51.0%)                |                               | 421 (57.0%)                               | 1 263 (57.0%)                |                                |
| Beneficiary of CMU-c (n, %) | 74 (10.0%)                                | 31 778 (6.8%)                  | 0.1158                        | 74 (10.0%)                                | 222 (10.0%)                  | 0.0000                         |

\* A standardized mean difference < 0,1 after matching is considered as acceptable.

**TABLE S2. Quality of propensity score matching between cohort of patients with uncontrolled severe asthma and cohort of patients with asthma**

| Matching variables              | Before Matching                           |                          |                               | After Matching                            |                       |                                |
|---------------------------------|-------------------------------------------|--------------------------|-------------------------------|-------------------------------------------|-----------------------|--------------------------------|
|                                 | Uncontrolled severe asthma cohort (n=739) | Asthma cohort (n=15,849) | Standardized mean differences | Uncontrolled severe asthma cohort (n=739) | Asthma cohort (n=739) | Standardized mean differences* |
| Age (mean, SD)                  | 62.0 (16.7)                               | 54.8 (20.9)              | 0.3826                        | 62.0 (16.7)                               | 63.2 (17.2)           | -0.0688                        |
| Sex                             |                                           |                          |                               |                                           |                       |                                |
| Male (n, %)                     | 318 (43.0%)                               | 7 010 (44.2%)            | 0.0242                        | 318 (43.0%)                               | 347 (47.0%)           | 0.0789                         |
| Female (n, %)                   | 421 (57.0%)                               | 8 839 (55.8%)            |                               | 421 (57.0%)                               | 392 (53.0%)           |                                |
| Beneficiary of CMU-c (n, %)     | 74 (10.0%)                                | 1 536 (9.7%)             | 0.0108                        | 74 (10.0%)                                | 57 (7.7%)             | 0.0810                         |
| Cardiovascular diseases (n, %)  | 405 (54.8%)                               | 6 863 (43.3%)            | 0.2316                        | 405 (54.8%)                               | 431 (58.3%)           | -0.0710                        |
| Coronary heart disease (n, %)   | 55 (7.4%)                                 | 1 036 (6.5%)             | 0.0355                        | 55 (7.4%)                                 | 69 (9.3%)             | -0.0684                        |
| Myocardial infarction (n, %)    | 8 (1.1%)                                  | 179 (1.1%)               | -0.0045                       | 8 (1.1%)                                  | 8 (1.1%)              | 0.0000                         |
| Arrhythmia (n, %)               | 60 (8.1%)                                 | 946 (6.0%)               | 0.0841                        | 60 (8.1%)                                 | 65 (8.8%)             | -0.0243                        |
| Heart failure (n, %)            | 33 (4.5%)                                 | 527 (3.3%)               | 0.0590                        | 33 (4.5%)                                 | 49 (6.6%)             | -0.0947                        |
| Hypertension (n, %)             | 364 (49.3%)                               | 6 178 (39.0%)            | 0.2081                        | 364 (49.3%)                               | 375 (50.7%)           | -0.0298                        |
| Cerebrovascular diseases (n, %) | 27 (3.7%)                                 | 411 (2.6%)               | 0.0610                        | 27 (3.7%)                                 | 29 (3.9%)             | -0.0142                        |
| Dyslipidemia (n, %)             | 237 (32.1%)                               | 4 439 (28.0%)            | 0.0887                        | 237 (32.1%)                               | 268 (36.3%)           | -0.0885                        |

|    |                           |              |                |         |              |              |         |
|----|---------------------------|--------------|----------------|---------|--------------|--------------|---------|
| 1  |                           |              |                |         |              |              |         |
| 2  |                           |              |                |         |              |              |         |
| 3  |                           |              |                |         |              |              |         |
| 4  | Diabetes (n, %)           | 108 (14.6%)  | 2 047 (12.9%)  | 0.0493  | 108 (14.6%)  | 112 (15.2%)  | -0.0152 |
| 5  | Osteoporosis (n, %)       | 110 (14.9%)  | 1 325 (8.4%)   | 0.2046  | 110 (14.9%)  | 112 (15.2%)  | -0.0076 |
| 6  |                           |              |                |         |              |              |         |
| 7  | Psychiatric illness**     |              |                |         |              |              |         |
| 8  | (n, %)                    | 224 (30.3%)  | 3 671 (23.2%)  | 0.1621  | 224 (30.3%)  | 223 (30.2%)  | 0.0029  |
| 9  | Cataract (n, %)           | 75 (10.1%)   | 1 049 (6.6%)   | 0.1276  | 75 (10.1%)   | 69 (9.3%)    | 0.0274  |
| 10 |                           |              |                |         |              |              |         |
| 11 | Rhinosinusitis (n, %)     | 3 (0.4%)     | 17 (0.1%)      | 0.0591  | 3 (0.4%)     | 2 (0.3%)     | 0.0233  |
| 12 |                           |              |                |         |              |              |         |
| 13 | Gastroesophageal reflux   |              |                |         |              |              |         |
| 14 | (n, %)                    | 79 (10.7%)   | 1 261 (8.0%)   | 0.0941  | 79 (10.7%)   | 69 (9.3%)    | 0.0451  |
| 15 | Atopic dermatitis         |              |                |         |              |              |         |
| 16 | (n, %)                    | 1 (0.1%)     | 22 (0.1%)      | -0.0009 | 1 (0.1%)     | 0 (0.0%)     | 0.0521  |
| 17 | Nasal polyposis           |              |                |         |              |              |         |
| 18 | (n, %)                    | 14 (1.9%)    | 91 (0.6%)      | 0.1198  | 14 (1.9%)    | 5 (0.7%)     | 0.1083  |
| 19 | Nasal antihistamine       |              |                |         |              |              |         |
| 20 | (n, %)                    | 1 (0.1%)     | 197 (1.2%)     | -0.1342 | 1 (0.1%)     | 3 (0.4%)     | -0.0521 |
| 21 | Ocular antihistamine      |              |                |         |              |              |         |
| 22 | (n, %)                    | 4 (0.5%)     | 589 (3.7%)     | -0.2213 | 4 (0.5%)     | 6 (0.8%)     | -0.0330 |
| 23 | Systemic antihistamine    |              |                |         |              |              |         |
| 24 | (n, %)                    | 65 (8.8%)    | 7 892 (49.8%)  | -1.0090 | 65 (8.8%)    | 75 (10.1%)   | -0.0462 |
| 25 | Nasal corticosteroid      |              |                |         |              |              |         |
| 26 | (n, %)                    | 10 (1.4%)    | 6 597 (41.6%)  | -1.1249 | 10 (1.4%)    | 15 (2.0%)    | -0.0525 |
| 27 | Non-steroidal anti-       |              |                |         |              |              |         |
| 28 | inflammatory drugs (n, %) | 70 (9.5%)    | 7 756 (48.9%)  | -0.9634 | 70 (9.5%)    | 73 (9.9%)    | -0.0137 |
| 29 | Antibiotic (n, %)         | 170 (23.0%)  | 10 249 (64.7%) | -0.9251 | 170 (23.0%)  | 184 (24.9%)  | -0.0444 |
| 30 | Proton pump inhibitor     |              |                |         |              |              |         |
| 31 | (n, %)                    | 122 (16.5%)  | 6 776 (42.8%)  | -0.6001 | 122 (16.5%)  | 132 (17.9%)  | -0.0359 |
| 32 | Psychotropic drug (n, %)  | 128 (17.3%)  | 6 091 (38.4%)  | -0.4844 | 128 (17.3%)  | 172 (23.3%)  | -0.1484 |
| 33 |                           |              |                |         |              |              |         |
| 34 | Dermocorticoids           |              |                |         |              |              |         |
| 35 | (n, %)                    | 19 (2.6%)    | 3 321 (21.0%)  | -0.5954 | 19 (2.6%)    | 25 (3.4%)    | -0.0478 |
| 36 | Topical immunosuppressant |              |                |         |              |              |         |
| 37 | (n, %)                    | 1 (0.1%)     | 31 (0.2%)      | -0.0148 | 1 (0.1%)     | 0 (0.0%)     | 0.0521  |
| 38 | Outpatient consultation   |              |                |         |              |              |         |
| 39 | (n, %)                    | 656 (88.8%)  | 14 159 (89.3%) | -0.0182 | 656 (88.8%)  | 668 (90.4%)  | -0.0532 |
| 40 | Hospital consultation     |              |                |         |              |              |         |
| 41 | (n, %)                    | 193 (26.1%)  | 3 685 (23.3%)  | 0.0665  | 193 (26.1%)  | 171 (23.1%)  | 0.0691  |
| 42 | Consultation with a nurse |              |                |         |              |              |         |
| 43 | (n, %)                    | 551 (74.6%)  | 9 941 (62.7%)  | 0.2572  | 551 (74.6%)  | 548 (74.2%)  | 0.0093  |
| 44 | Consultation with a       |              |                |         |              |              |         |
| 45 | physiotherapist           |              |                |         |              |              |         |
| 46 | (n, %)                    | 383 (51.8%)  | 6 754 (42.6%)  | 0.1853  | 383 (51.8%)  | 363 (49.1%)  | 0.0541  |
| 47 | Hospitalization           |              |                |         |              |              |         |
| 48 | (n, %)                    | 468 (63.3%)  | 8 834 (55.7%)  | 0.1551  | 468 (63.3%)  | 475 (64.3%)  | -0.0197 |
| 49 | Emergency room visits     |              |                |         |              |              |         |
| 50 | (n, %)                    | 356 (48.2%)  | 6 442 (40.6%)  | 0.1519  | 356 (48.2%)  | 349 (47.2%)  | 0.0190  |
| 51 | Number of outpatient      |              |                |         |              |              |         |
| 52 | consultations             |              |                |         |              |              |         |
| 53 | (mean, SD)                | 36.9 (30.0)  | 29.2 (25.9)    | 0.2724  | 36.9 (30.0)  | 33.7 (26.7)  | 0.1128  |
| 54 | Number of hospital        |              |                |         |              |              |         |
| 55 | consultations             |              |                |         |              |              |         |
| 56 | (mean, SD)                | 3.4 (10.2)   | 2.4 (7.9)      | 0.1094  | 3.4 (10.2)   | 3.3 (10.0)   | 0.0175  |
| 57 | Number of consultations   |              |                |         |              |              |         |
| 58 | with a nurse (mean, SD)   | 53.5 (195.3) | 27.9 (132.7)   | 0.1535  | 53.5 (195.3) | 41.6 (162.1) | 0.0665  |
| 59 | Number of consultations   |              |                |         |              |              |         |
| 60 | with a physiotherapist    |              |                |         |              |              |         |
|    | (mean, SD)                | 37.0 (98.8)  | 21.1 (62.3)    | 0.1935  | 37.0 (98.8)  | 34.1 (104.0) | 0.0286  |
|    | Number of                 |              |                |         |              |              |         |
|    | hospitalizations          |              |                |         |              |              |         |
|    | (mean, SD)                | 2.3 (5.0)    | 1.6 (4.0)      | 0.1514  | 2.3 (5.0)    | 2.4 (5.0)    | -0.0057 |



|                                            |           |           |        |           |           |         |
|--------------------------------------------|-----------|-----------|--------|-----------|-----------|---------|
| Number of emergency room visits (mean, SD) | 1.2 (2.2) | 0.9 (1.9) | 0.1606 | 1.2 (2.2) | 1.2 (1.9) | 0.0340  |
| Charlson's score (mean, SD)                | 3.6 (2.3) | 3.0 (2.3) | 0.2588 | 3.6 (2.3) | 3.8 (2.4) | -0.0702 |

\* A standardized mean difference < 0,1 after matching is considered as acceptable.

\*\*Psychiatric illness includes depression, anxiety, and psychotic disorders.

For peer review only

**FIGURE S2. Quality of propensity score matching between cohort of patients with uncontrolled severe asthma and cohort of patients with asthma**

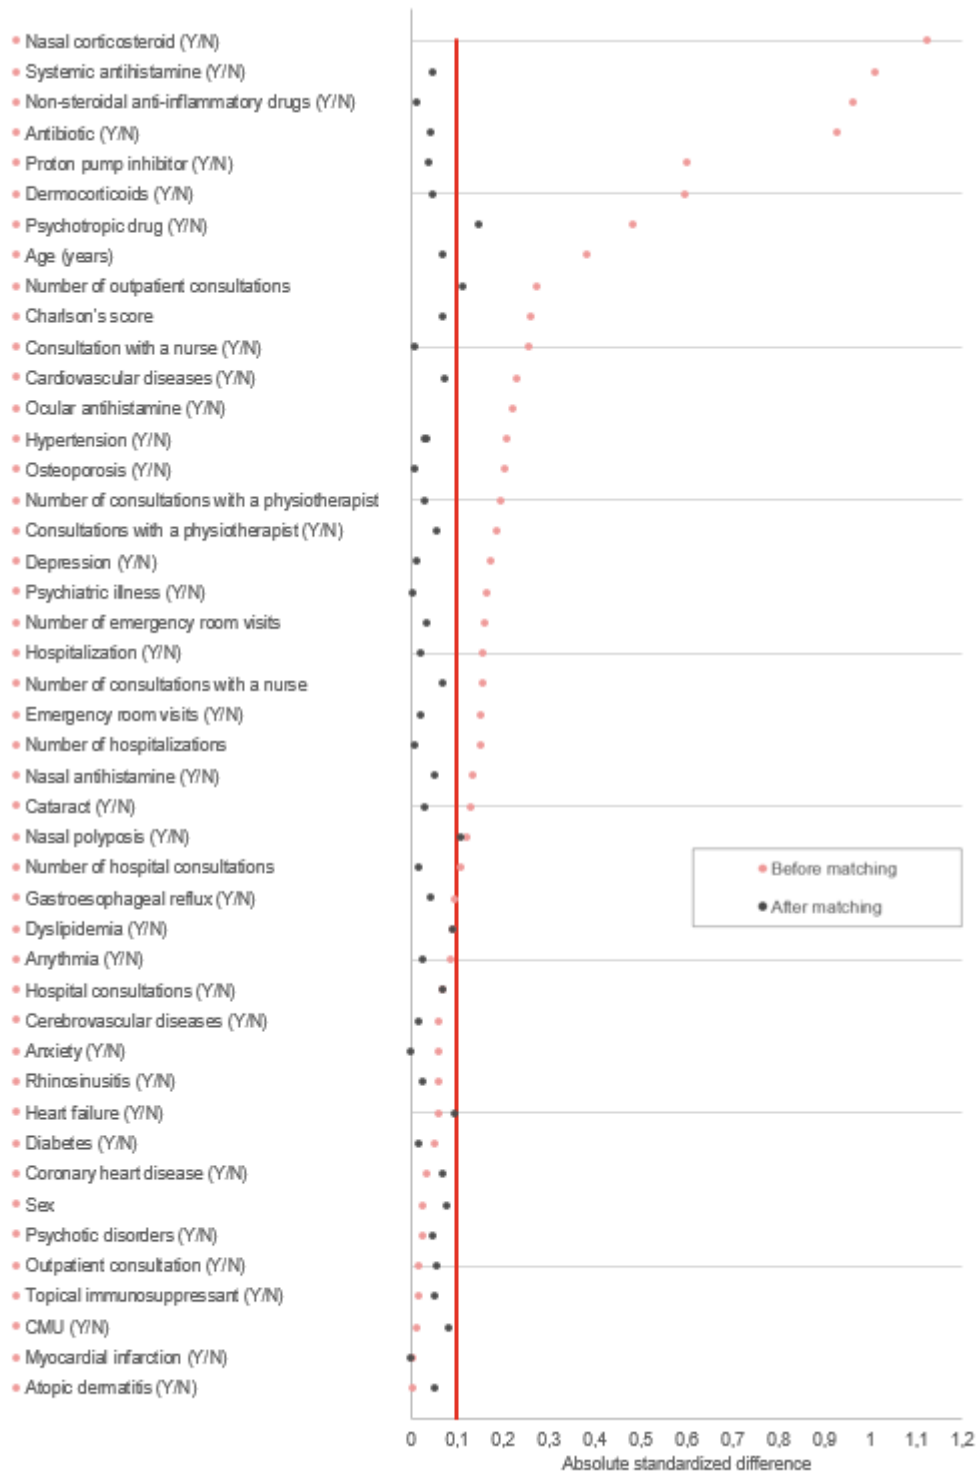

A standardized mean difference < 0,1 after matching is considered as acceptable.

**FIGURE S3. Analysis of mortality by age group**

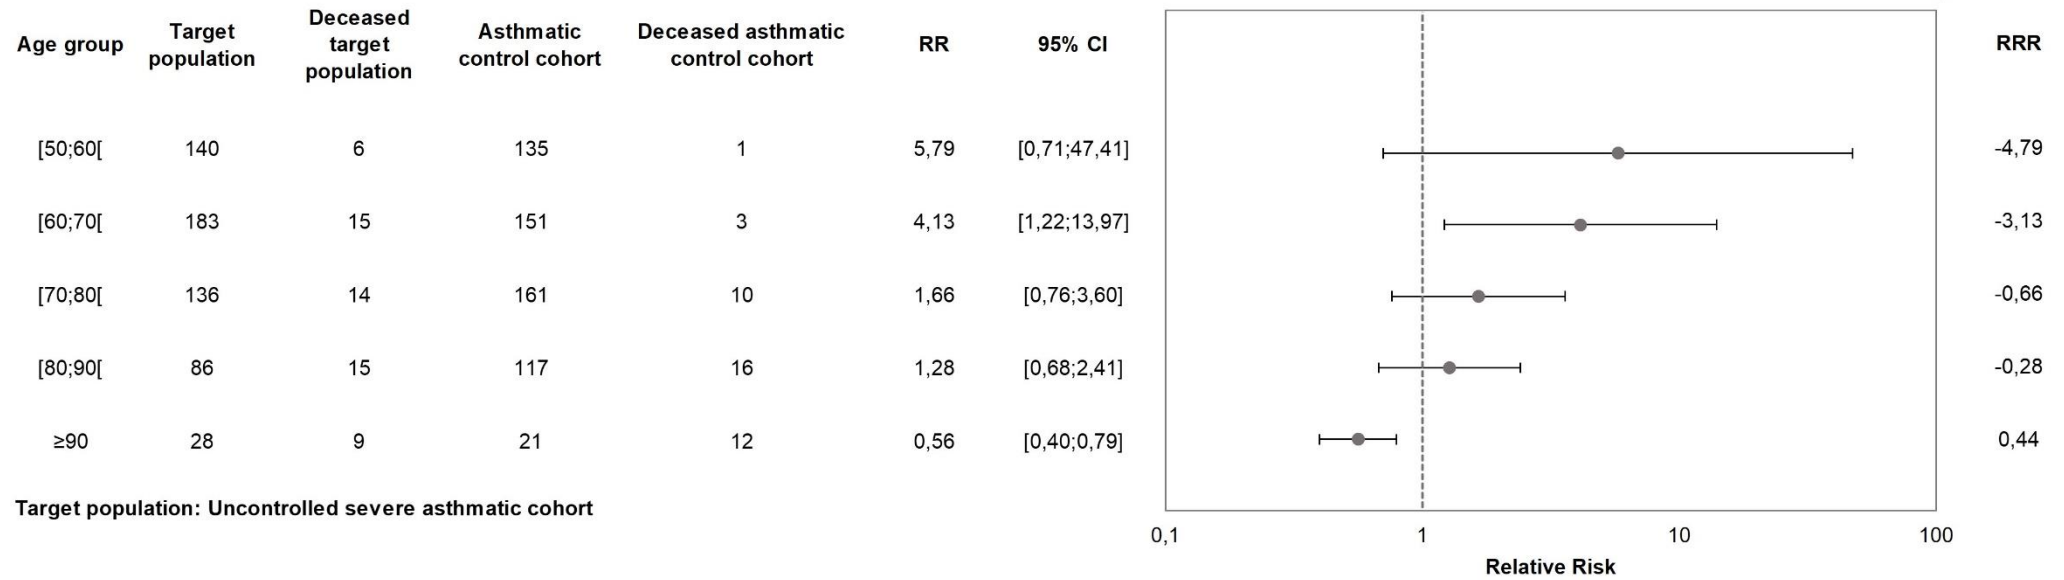

**Table S3. Results of multivariate Cox model on mortality**

| Covariate                                                                                                            | Hazard ratio | 95% CI      |
|----------------------------------------------------------------------------------------------------------------------|--------------|-------------|
| Age (1-year increase)                                                                                                | 1.07         | 1.05 - 1.09 |
| History of cardiovascular diseases (with vs. without)                                                                | 1.91         | 1.18 - 3.09 |
| History of diabetes (with vs. without)                                                                               | 1.66         | 1.11 - 2.49 |
| History of cancer (with vs. without)                                                                                 | 2.40         | 1.64 - 3.50 |
| Patients with uncontrolled severe asthma vs. general population in population with history of psychiatric disease    | 1.22         | 0.66 - 2.26 |
| Patients with uncontrolled severe asthma vs. general population in population without history of psychiatric disease | 3.25         | 2.14 - 4.92 |

Key: CI – confidence interval.

**FIGURE S4. 24-month survival for the uncontrolled severe asthmatic cohort versus general population among subjects without history of psychiatric disease**

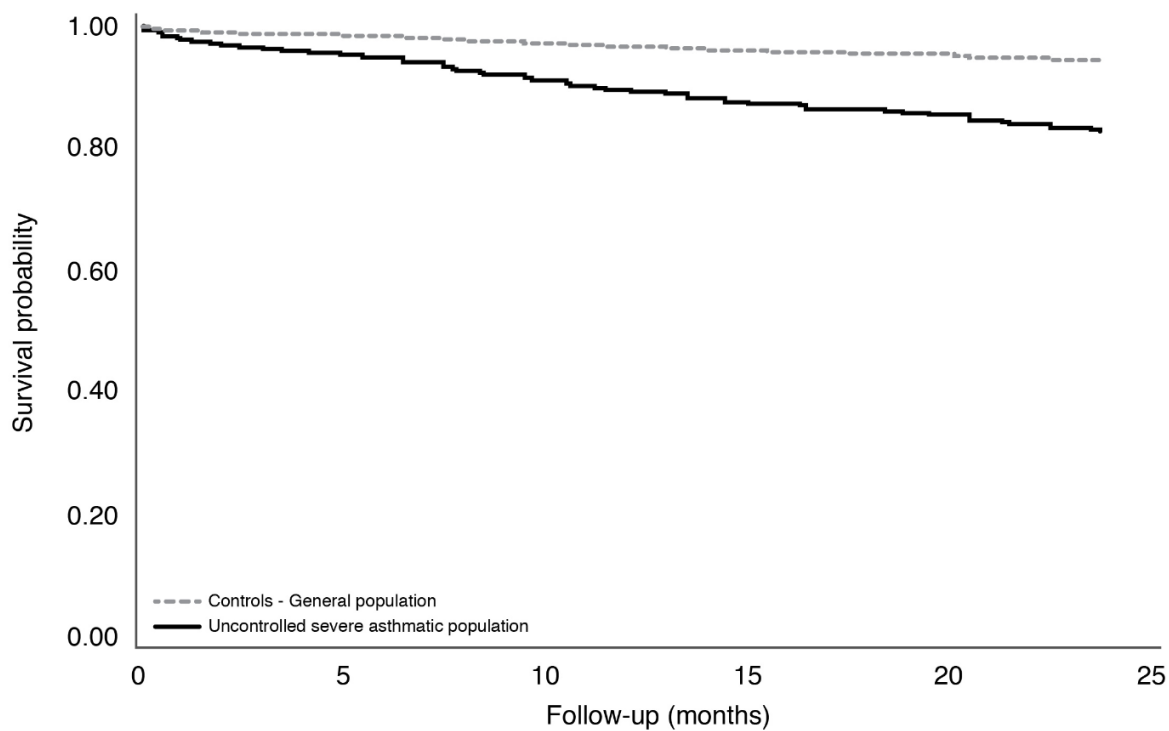

review only

STROBE Statement—Checklist of items that should be included in reports of *cohort studies*

|                              | Item No | Recommendation                                                                                                                                                                                                                                                                                                         | Page No          |
|------------------------------|---------|------------------------------------------------------------------------------------------------------------------------------------------------------------------------------------------------------------------------------------------------------------------------------------------------------------------------|------------------|
| <b>Title and abstract</b>    | 1       | (a) Indicate the study's design with a commonly used term in the title or the abstract<br>(b) Provide in the abstract an informative and balanced summary of what was done and what was found                                                                                                                          | 1-3              |
| <b>Introduction</b>          |         |                                                                                                                                                                                                                                                                                                                        |                  |
| Background/rationale         | 2       | Explain the scientific background and rationale for the investigation being reported                                                                                                                                                                                                                                   | 5                |
| Objectives                   | 3       | State specific objectives, including any prespecified hypotheses                                                                                                                                                                                                                                                       | 5                |
| <b>Methods</b>               |         |                                                                                                                                                                                                                                                                                                                        |                  |
| Study design                 | 4       | Present key elements of study design early in the paper                                                                                                                                                                                                                                                                | 6                |
| Setting                      | 5       | Describe the setting, locations, and relevant dates, including periods of recruitment, exposure, follow-up, and data collection                                                                                                                                                                                        | 6                |
| Participants                 | 6       | (a) Give the eligibility criteria, and the sources and methods of selection of participants. Describe methods of follow-up<br>(b) For matched studies, give matching criteria and number of exposed and unexposed                                                                                                      | 7                |
| Variables                    | 7       | Clearly define all outcomes, exposures, predictors, potential confounders, and effect modifiers. Give diagnostic criteria, if applicable                                                                                                                                                                               | 7-8              |
| Data sources/<br>measurement | 8*      | For each variable of interest, give sources of data and details of methods of assessment (measurement). Describe comparability of assessment methods if there is more than one group                                                                                                                                   | 6                |
| Bias                         | 9       | Describe any efforts to address potential sources of bias                                                                                                                                                                                                                                                              | 7                |
| Study size                   | 10      | Explain how the study size was arrived at                                                                                                                                                                                                                                                                              | 7<br>(Figure S1) |
| Quantitative variables       | 11      | Explain how quantitative variables were handled in the analyses. If applicable, describe which groupings were chosen and why                                                                                                                                                                                           | 8                |
| Statistical methods          | 12      | (a) Describe all statistical methods, including those used to control for confounding<br>(b) Describe any methods used to examine subgroups and interactions<br>(c) Explain how missing data were addressed<br>(d) If applicable, explain how loss to follow-up was addressed<br>(e) Describe any sensitivity analyses | 8-9              |
| <b>Results</b>               |         |                                                                                                                                                                                                                                                                                                                        |                  |
| Participants                 | 13*     | (a) Report numbers of individuals at each stage of study—eg numbers potentially eligible, examined for eligibility, confirmed eligible, included in the study, completing follow-up, and analysed<br>(b) Give reasons for non-participation at each stage<br>(c) Consider use of a flow diagram                        | 10               |
| Descriptive data             | 14*     | (a) Give characteristics of study participants (eg demographic, clinical, social) and information on exposures and potential confounders<br>(b) Indicate number of participants with missing data for each variable of interest<br>(c) Summarise follow-up time (eg, average and total amount)                         | 10               |
| Outcome data                 | 15*     | Report numbers of outcome events or summary measures over time                                                                                                                                                                                                                                                         | 10-16            |

|    |                          |    |                                                                                                                                                                                                              |
|----|--------------------------|----|--------------------------------------------------------------------------------------------------------------------------------------------------------------------------------------------------------------|
| 1  |                          |    |                                                                                                                                                                                                              |
| 2  |                          |    |                                                                                                                                                                                                              |
| 3  | Main results             | 16 | (a) Give unadjusted estimates and, if applicable, confounder-adjusted estimates and their precision (eg, 95% confidence interval). Make clear which confounders were adjusted for and why they were included |
| 4  |                          |    |                                                                                                                                                                                                              |
| 5  |                          |    |                                                                                                                                                                                                              |
| 6  |                          |    | (b) Report category boundaries when continuous variables were categorized                                                                                                                                    |
| 7  |                          |    |                                                                                                                                                                                                              |
| 8  |                          |    | (c) If relevant, consider translating estimates of relative risk into absolute risk for a meaningful time period                                                                                             |
| 9  |                          |    |                                                                                                                                                                                                              |
| 10 |                          |    |                                                                                                                                                                                                              |
| 11 | Other analyses           | 17 | Report other analyses done—eg analyses of subgroups and interactions, and sensitivity analyses                                                                                                               |
| 12 |                          |    |                                                                                                                                                                                                              |
| 13 |                          |    |                                                                                                                                                                                                              |
| 14 | <b>Discussion</b>        |    |                                                                                                                                                                                                              |
| 15 | Key results              | 18 | Summarise key results with reference to study objectives                                                                                                                                                     |
| 16 | Limitations              | 19 | Discuss limitations of the study, taking into account sources of potential bias or imprecision. Discuss both direction and magnitude of any potential bias                                                   |
| 17 |                          |    |                                                                                                                                                                                                              |
| 18 | Interpretation           | 20 | Give a cautious overall interpretation of results considering objectives, limitations, multiplicity of analyses, results from similar studies, and other relevant evidence                                   |
| 19 |                          |    |                                                                                                                                                                                                              |
| 20 | Generalisability         | 21 | Discuss the generalisability (external validity) of the study results                                                                                                                                        |
| 21 |                          |    |                                                                                                                                                                                                              |
| 22 |                          |    |                                                                                                                                                                                                              |
| 23 | <b>Other information</b> |    |                                                                                                                                                                                                              |
| 24 | Funding                  | 22 | Give the source of funding and the role of the funders for the present study and, if applicable, for the original study on which the present article is based                                                |
| 25 |                          |    |                                                                                                                                                                                                              |
| 26 |                          |    |                                                                                                                                                                                                              |
| 27 |                          |    |                                                                                                                                                                                                              |
| 28 |                          |    |                                                                                                                                                                                                              |
| 29 |                          |    |                                                                                                                                                                                                              |
| 30 |                          |    |                                                                                                                                                                                                              |
| 31 |                          |    |                                                                                                                                                                                                              |
| 32 |                          |    |                                                                                                                                                                                                              |
| 33 |                          |    |                                                                                                                                                                                                              |
| 34 |                          |    |                                                                                                                                                                                                              |
| 35 |                          |    |                                                                                                                                                                                                              |
| 36 |                          |    |                                                                                                                                                                                                              |
| 37 |                          |    |                                                                                                                                                                                                              |
| 38 |                          |    |                                                                                                                                                                                                              |
| 39 |                          |    |                                                                                                                                                                                                              |
| 40 |                          |    |                                                                                                                                                                                                              |
| 41 |                          |    |                                                                                                                                                                                                              |
| 42 |                          |    |                                                                                                                                                                                                              |
| 43 |                          |    |                                                                                                                                                                                                              |
| 44 |                          |    |                                                                                                                                                                                                              |
| 45 |                          |    |                                                                                                                                                                                                              |
| 46 |                          |    |                                                                                                                                                                                                              |
| 47 |                          |    |                                                                                                                                                                                                              |
| 48 |                          |    |                                                                                                                                                                                                              |
| 49 |                          |    |                                                                                                                                                                                                              |
| 50 |                          |    |                                                                                                                                                                                                              |
| 51 |                          |    |                                                                                                                                                                                                              |
| 52 |                          |    |                                                                                                                                                                                                              |
| 53 |                          |    |                                                                                                                                                                                                              |
| 54 |                          |    |                                                                                                                                                                                                              |
| 55 |                          |    |                                                                                                                                                                                                              |
| 56 |                          |    |                                                                                                                                                                                                              |
| 57 |                          |    |                                                                                                                                                                                                              |
| 58 |                          |    |                                                                                                                                                                                                              |
| 59 |                          |    |                                                                                                                                                                                                              |
| 60 |                          |    |                                                                                                                                                                                                              |

\*Give information separately for exposed and unexposed groups.

**Note:** An Explanation and Elaboration article discusses each checklist item and gives methodological background and published examples of transparent reporting. The STROBE checklist is best used in conjunction with this article (freely available on the Web sites of PLoS Medicine at <http://www.plosmedicine.org/>, Annals of Internal Medicine at <http://www.annals.org/>, and Epidemiology at <http://www.epidem.com/>). Information on the STROBE Initiative is available at <http://www.strobe-statement.org>.

# BMJ Open

## Real-life impact of uncontrolled severe asthma on mortality and healthcare use in adolescents and adults: findings from the retrospective, observational RESONANCE study in France

|                                 |                                                                                                                                                                                                                                                                                                                                                                                                                                                                                                                                                                                                                                                                                                                                                                                                                                                                                                          |
|---------------------------------|----------------------------------------------------------------------------------------------------------------------------------------------------------------------------------------------------------------------------------------------------------------------------------------------------------------------------------------------------------------------------------------------------------------------------------------------------------------------------------------------------------------------------------------------------------------------------------------------------------------------------------------------------------------------------------------------------------------------------------------------------------------------------------------------------------------------------------------------------------------------------------------------------------|
| Journal:                        | <i>BMJ Open</i>                                                                                                                                                                                                                                                                                                                                                                                                                                                                                                                                                                                                                                                                                                                                                                                                                                                                                          |
| Manuscript ID                   | bmjopen-2021-060160.R2                                                                                                                                                                                                                                                                                                                                                                                                                                                                                                                                                                                                                                                                                                                                                                                                                                                                                   |
| Article Type:                   | Original research                                                                                                                                                                                                                                                                                                                                                                                                                                                                                                                                                                                                                                                                                                                                                                                                                                                                                        |
| Date Submitted by the Author:   | 19-Jul-2022                                                                                                                                                                                                                                                                                                                                                                                                                                                                                                                                                                                                                                                                                                                                                                                                                                                                                              |
| Complete List of Authors:       | Roche, Nicolas; Assistance Publique - Hopitaux de Paris, Hôpital Cochin, Service de pneumologie ; Centre - Université de Paris, UMR 1016, Institut Cochin<br>Garcia, Gilles; Assistance Publique - Hopitaux de Paris, Université Paris-Sud, Université Paris-Saclay, Hôpital Bicêtre, Service de pneumologie de Larrard, Alexandre; stève consultants<br>Cancalon, Charlotte; stève consultants<br>Bénard, Stève; stève consultants<br>Perez, Vincent; Sanofi-Aventis France SA<br>Mahieu, Aymeric; Sanofi-Aventis France SA<br>Vieu, Laurine; Sanofi-Aventis France SA<br>Demoly, Pascal ; Centre Hospitalier Universitaire de Montpellier, Hôpital Arnaud-de-Villeneuve, Université de Montpellier, Unité d'allergologie, département de pneumologie et addictologie ; Institut Desbrest d'Épidémiologie et de Santé Publique (IDESP) - UA11, UMR INSERM-Université de Montpellier, Campus Santé, IURC |
| <b>Primary Subject Heading</b>: | Respiratory medicine                                                                                                                                                                                                                                                                                                                                                                                                                                                                                                                                                                                                                                                                                                                                                                                                                                                                                     |
| Secondary Subject Heading:      | Health economics, Epidemiology                                                                                                                                                                                                                                                                                                                                                                                                                                                                                                                                                                                                                                                                                                                                                                                                                                                                           |
| Keywords:                       | Asthma < THORACIC MEDICINE, Epidemiology < THORACIC MEDICINE, HEALTH ECONOMICS                                                                                                                                                                                                                                                                                                                                                                                                                                                                                                                                                                                                                                                                                                                                                                                                                           |
|                                 |                                                                                                                                                                                                                                                                                                                                                                                                                                                                                                                                                                                                                                                                                                                                                                                                                                                                                                          |

SCHOLARONE™  
Manuscripts





I, the Submitting Author has the right to grant and does grant on behalf of all authors of the Work (as defined in the below author licence), an exclusive licence and/or a non-exclusive licence for contributions from authors who are: i) UK Crown employees; ii) where BMJ has agreed a CC-BY licence shall apply, and/or iii) in accordance with the terms applicable for US Federal Government officers or employees acting as part of their official duties; on a worldwide, perpetual, irrevocable, royalty-free basis to BMJ Publishing Group Ltd ("BMJ") its licensees and where the relevant Journal is co-owned by BMJ to the co-owners of the Journal, to publish the Work in this journal and any other BMJ products and to exploit all rights, as set out in our [licence](#).

The Submitting Author accepts and understands that any supply made under these terms is made by BMJ to the Submitting Author unless you are acting as an employee on behalf of your employer or a postgraduate student of an affiliated institution which is paying any applicable article publishing charge ("APC") for Open Access articles. Where the Submitting Author wishes to make the Work available on an Open Access basis (and intends to pay the relevant APC), the terms of reuse of such Open Access shall be governed by a Creative Commons licence – details of these licences and which [Creative Commons](#) licence will apply to this Work are set out in our licence referred to above.

Other than as permitted in any relevant BMJ Author's Self Archiving Policies, I confirm this Work has not been accepted for publication elsewhere, is not being considered for publication elsewhere and does not duplicate material already published. I confirm all authors consent to publication of this Work and authorise the granting of this licence.

1  
2  
3  
4 **Real-life impact of uncontrolled severe asthma on mortality and healthcare use in**  
5 **adolescents and adults: findings from the retrospective, observational RESONANCE**  
6 **study in France**  
7

8  
9 Nicolas Roche, MD<sup>1</sup>, Gilles Garcia, MD<sup>2</sup>, Alexandre de Larrard, PharmD<sup>3</sup>, Charlotte Cancalon,  
10 MSc<sup>3</sup>, Stève Bénard, PharmD<sup>3</sup>, Vincent Perez, MD<sup>4</sup>, Aymeric Mahieu, PharmD<sup>4</sup>, Laurine Vieu,  
11 PharmD<sup>4</sup>, Pascal Demoly, MD<sup>5</sup>  
12  
13  
14

15 <sup>1</sup> Pneumologie, Hôpital Cochin, APHP. Centre - Université de Paris, UMR 1016, Institut  
16 Cochin, 27 rue du Fbg St Jacques, 75014 Paris, France.  
17

18 <sup>2</sup> Assistance Publique-Hôpitaux de Paris, Université Paris-Sud, Université Paris-Saclay,  
19 Hôpital Bicêtre, Service de pneumologie, 78, rue du Général-Leclerc, 94270 Le Kremlin-  
20 Bicêtre, France.  
21  
22

23 <sup>3</sup> stève consultants, Oullins, France.  
24

25 <sup>4</sup> Sanofi-Aventis France, Gentilly, France.  
26

27 <sup>5</sup> Unité d'allergologie, département de pneumologie et addictologie, Hôpital Arnaud-de-  
28 Villeneuve, Université de Montpellier, CHU de Montpellier, 371, avenue du Doyen Gaston  
29 Giraud, 34090 Montpellier, France; Institut Desbrest d'Épidémiologie et de Santé Publique  
30 (IDESP) - UA11, UMR INSERM-Université de Montpellier, Campus Santé, IURC, 641 avenue  
31 du Doyen Gaston Giraud, 34093 Montpellier Cedex 5, France.  
32  
33  
34  
35  
36  
37  
38

39 **Correspondence to:**

40 Nicolas Roche

41  
42 Pneumologie, Hôpital Cochin, AP-HP. Centre - Université de Paris (Descartes), UMR 1016,  
43 Institut Cochin  
44

45  
46 27 rue du Fbg St Jacques, 75014 Paris, France  
47

48 T: +33 158 41 21 53  
49

50 E: nicolas.roche@aphp.fr  
51  
52  
53  
54  
55  
56  
57  
58  
59  
60

## ABSTRACT

**Objective:** To characterize uncontrolled severe asthma and compare the disease burden with the general and asthmatic populations.

**Design:** Retrospective observational study using a national sample of a French healthcare database (*Echantillon Généraliste des Bénéficiaires [EGB]*).

**Setting:** The EGB, an anonymized permanent sample of health insurance databases, representing 1/97<sup>th</sup> of the French population.

**Participants:** Patients ( $\geq 12$  years) were selected in year 2014 and followed 2 years. A cohort of patients with uncontrolled severe asthma was defined using an algorithm based on peer-reviewed literature and Global Initiative for Asthma recommendations. Index date was the occurrence of the first marker of uncontrolled asthma. This cohort was matched with 2 control cohorts, general population and asthmatic controls, on baseline characteristics.

**Main outcomes measures:** Mortality, healthcare use, and associated costs were studied in the 2 years of follow-up.

**Results:** Among 467,716 individuals in the EGB, 16,588 patients with asthma were identified, including 739 (4.5%) with uncontrolled severe disease. The survival probability at 2 years for patients with uncontrolled severe asthma (92.0%) was lower than in the general population cohort (96.6%; relative risk of death: 2.35; 95% confidence interval: 1.70-3.29;  $P < 0.0001$ ) and tended to be lower than in the control asthmatic cohort (94.3%;  $P = 0.07$ ). Emergency department visits and hospitalizations were higher in patients with uncontrolled severe asthma than in the general population (64.7% vs. 34.9%;  $P < 0.0001$ ) and asthmatic controls (64.7% vs. 55.2%;  $P = 0.0002$ ). Other components of healthcare use (medical and paramedical visits, medications) were increased in patients with uncontrolled severe asthma compared with control populations. These increases translated into higher costs ( $P < 0.0001$  for both comparisons).

1  
2  
3 **Conclusions:** This study demonstrates the huge burden of uncontrolled severe asthma in  
4 terms of mortality, morbidity, and healthcare resource consumption compared with other  
5 patients with asthma and with the general population and emphasizes the importance of  
6 appropriate management in this high-risk population.  
7  
8  
9  
10  
11  
12  
13  
14  
15  
16  
17  
18  
19  
20  
21  
22  
23  
24  
25  
26  
27  
28  
29  
30  
31  
32  
33  
34  
35  
36  
37  
38  
39  
40  
41  
42  
43  
44  
45  
46  
47  
48  
49  
50  
51  
52  
53  
54  
55  
56  
57  
58  
59  
60

For peer review only

### Strengths and limitations of this study

- The study was conducted using a well-recognized and robust populational medical administrative database that confers many advantages, such as the completeness of mortality data and comprehensiveness of healthcare reimbursed for all patients.
- This is the first study, to our knowledge, to specifically compare patients with uncontrolled severe asthma with the overall asthmatic population, in the French population.
- Comparability of studied groups was ensured by careful matching process.
- The lack of clinical data was mitigated by the use of a comprehensive algorithm to identify the uncontrolled severe asthmatic population with great care in the definitions of asthma, severity, and control to ensure the accuracy of the cohorts.
- The criteria requiring continuous insurance coverage may have resulted in a marginally lower number of younger patients being included due to student-specific insurance offered during school years.

## INTRODUCTION

Asthma is one of the most common chronic diseases and is a major cause of morbidity. This heterogeneous disease is characterized by its chronic inflammatory nature which can lead to airway remodeling and presents with varied levels of severity and control. While a majority of patients with asthma have mild to moderate disease according to Global Initiative for Asthma (GINA) criteria, between 3% and 10% present a severe asthma, which may be life-threatening, particularly due to severe and potentially fatal exacerbations.[1,2] Despite implementation of an optimal management strategy, many patients with severe asthma are not able to achieve disease control, leading to poor quality of life and significant social and health burdens. Therefore, asthma represents an important public health issue given its impact on work productivity (*i.e.*, absenteeism and presenteeism) and the costs associated with disease management and healthcare resource utilization.[3–7]

In the context of the rapidly evolving landscape of expensive GINA step 5 asthma treatments, it is crucial to generate up-to-date data on the real-life population burden of uncontrolled severe asthma in adolescents and adults and to understand the relative impact of the disease in patients with severe asthma compared to the general and to non-severe asthmatic populations. The framework of the French Health Data Hub project provided the opportunity to access the public medico-administrative database to address this specific issue.

The RESONANCE study was undertaken to: (1) characterize uncontrolled severe asthma in patients aged 12 years and older, and (2) compare the disease burden in terms of mortality, healthcare utilization, and associated costs within this population to two series of matched controls from the general population and the asthmatic population (*i.e.* total asthmatic population excluding those with uncontrolled severe asthma).

## METHODS

### Study Design

A retrospective, non-interventional cohort study was carried out using a large population database from France, the *Echantillon Généraliste des Bénéficiaires* (EGB). All individuals aged 12 years and over in the EGB were included in the source population. A cohort of adolescent and adult patients who had uncontrolled severe asthma during 2014 were identified. Their index date was the date of the first event identifying non-control during 2014. Two control cohorts were defined, one from the general population and another of patients with asthma. For each selected control, the assigned index date was the calendar index date of respective matched patients from the uncontrolled severe asthma cohort.

Historical information on comorbidities, healthcare use, and treatments received were collected up to five years preceding the index date to assess baseline characteristics. Socio-demographic characteristics were collected at index date for the three cohorts. Cohorts were followed up to two years after the index date or death, whichever occurs first, to assess the outcomes of interest (Figure 1).

### Data sources

The EGB is an anonymized permanent sample of health insurance databases representing 1/97<sup>th</sup> of the entire French population.[8,9] Given the universal healthcare system in France, the EGB is a sizeable and representative sample of all subjects covered by various social security schemes, and now includes nearly 660,000 beneficiaries.

The EGB contains information on demographics (age, sex, area of residence, etc.); outpatient care reimbursement (including drug dispensing); medical care and reimbursement received in outpatient and hospital settings; specific information on the right to universal supplementary health coverage (CMU-c); whether beneficiaries are affected by a long-term condition (*affection de longue durée*; ALD); and the date of death. The database benefits from the

1  
2  
3 interlinkage of several administrative data sources, thereby allowing an assessment of  
4 beneficiaries' healthcare utilization over time.  
5  
6  
7

## 8 **Subjects**

9  
10 Patients with uncontrolled severe asthma were identified using an algorithm based on events  
11 occurring in 2014 (Figure S1, Supplementary File). This algorithm was designed following a  
12 literature review,[10–12] and GINA management recommendations,[13] in collaboration with  
13 an expert scientific committee composed of 3 respiratory specialists.  
14  
15  
16  
17  
18

19  
20 Patients with evidence of another chronic pulmonary disease, including chronic obstructive  
21 pulmonary disease (COPD), identified through International Classification of Diseases, 10<sup>th</sup>  
22 Revision (ICD-10) codes related to hospital diagnoses or ALD, were excluded (Supplementary  
23 File).  
24  
25  
26  
27  
28

29  
30 Controls from general population were randomly selected among all individuals, besides  
31 patients with uncontrolled severe asthma, present in the EGB in 2014. Controls were matched  
32 with patients in the uncontrolled severe asthma cohort on age, sex, and CMU-c status at index  
33 date. Up to 3 controls per case were selected. Direct matching quality was assessed by  
34 comparing standardized differences between both cohorts (Table S1, Supplementary File).  
35  
36  
37  
38  
39

40  
41 Individuals in the asthma cohort were randomly selected within the total asthmatic population  
42 present in the EGB in 2014, excluding those with uncontrolled severe asthma. Individuals were  
43 matched with patients in the uncontrolled severe asthma cohort on a 1:1 ratio, using nearest  
44 neighbour propensity score matching. Propensity scores incorporated 45 variables  
45 recommended by the expert scientific committee, including sociodemographic characteristics,  
46 comorbidities, and history of healthcare use prior to index date. Standardized differences were  
47 used to assess matching quality (Table S2, Supplementary File).  
48  
49  
50  
51  
52  
53  
54  
55

## 56 **Collected data and outcomes**

57  
58 The following sociodemographic and clinical characteristics were considered:  
59  
60



- 1
- 2
- 3 • Up to 5 years prior to index date: comorbidities, treatments received, healthcare
- 4 utilization (medical visits, emergency department [ED] visits, hospitalizations)
- 5
- 6
- 7
- 8 • At index date: age, sex, CMU-c status
- 9
- 10 • During follow-up:
- 11
  - 12 ○ Date of death, if applicable
  - 13
  - 14
  - 15 ○ Drugs of interest: asthma treatments and other classes of interest
  - 16 (Supplementary File)
  - 17
  - 18
  - 19 ○ Healthcare utilization: Medical and paramedical visits (general medicine,
  - 20 respiratory specialists, otolaryngology, nursing support, physiotherapy), ED
  - 21 visits, and hospitalizations (all-cause and asthma-related)
  - 22
  - 23
  - 24
  - 25
  - 26 ○ Direct medical costs associated with medications and healthcare use
  - 27 (outpatient and hospital settings)
  - 28
  - 29

30 The primary objective of this study was to assess the number and proportion of patients with  
31 uncontrolled severe asthma aged 12 and older. Sociodemographic and clinical characteristics  
32 were provided for this population.  
33  
34

35  
36  
37 The secondary objective was to assess all-cause mortality and survival probability, healthcare  
38 use and associated costs in the 2 years after index date in the uncontrolled severe asthma  
39 cohort compared to the two matched control cohorts (general population and asthmatic  
40 controls).  
41  
42  
43  
44  
45  
46

### 47 **Statistical analyses**

48 Continuous variables were described using means, standard deviations, medians, and  
49 ranges, whilst categorical variables were described as frequencies.  
50  
51

52  
53  
54 Crude cumulative all-cause mortality rates at 2 years were obtained for all cohorts using the  
55 Kaplan-Meier methodology, whereby the probability of survival from index date through follow-  
56 up was estimated. The comparative analyses of mortality, healthcare utilization, and  
57  
58  
59  
60

1  
2  
3 associated costs between the primary cohort and matched controls were conducted using  
4 paired Student's *t*-tests or Wilcoxon signed-rank tests for quantitative variables according to  
5 their distribution, and Mc Nemar tests for qualitative variables. A post-hoc analysis using a  
6  
7 Cox regression model was built to compare mortality between the uncontrolled severe  
8  
9 asthmatic cohort and general population. The final model included the following variables:  
10  
11 population (uncontrolled severe asthmatic cohort vs. general population), age, history of  
12  
13 cardiovascular disease, diabetes, psychiatric disease, and cancer. Interaction terms between  
14  
15 the variable "population" and other covariates included in the model were tested. Interaction  
16  
17 between population and history of psychiatric disease was significant and was thus included  
18  
19 in the final model, with other variables listed above. Costs were evaluated from the collective  
20  
21 perspective, and all costs collected between 2014 and 2016 were reevaluated to correspond  
22  
23 to 2018 Euros (€) using the 2018 consumer price index (health data index 4011-E, published  
24  
25 by national institute of statistics and economic studies, *Institut National de la Statistique et des*  
26  
27 *Études Économiques, INSEE*), since 2018 was the date of data access. All analyses were  
28  
29 performed using the SAS 9.4 software package (SAS Institute, Cary, NC, USA).  
30  
31  
32  
33  
34  
35

### 36 **Ethical considerations**

37 Used data were anonymized to ensure confidentiality at the patient level. Data handling,  
38  
39 processing, and analysis were carried out in alignment and with authorizations from an  
40  
41 independent committee (*CEREES, Comité d'Expertise pour les Recherches, les Études et les*  
42  
43 *Évaluations dans le domaine de la Santé*; favorable opinion on June 14, 2018; TPS 31996)  
44  
45 and from the French National Data Protection Agency (*CNIL, Commission Nationale de*  
46  
47 *l'Informatique et des Libertés*; Authorization DR-2018-097).  
48  
49  
50

### 51 **Patient and Public Involvement Statement**

52 Patients and the public were not involved in the design, or conduct, or reporting, or  
53  
54 dissemination plans of our research.  
55  
56  
57  
58  
59  
60

## RESULTS

### Population selection

Of the 467,716 adolescents and adults present in the EGB, a total of 16,588 patients with asthma were identified and 5,025 of these exhibited a marker of uncontrolled disease in 2014 (Figure S1, Supplementary File). Among these, 739 patients with uncontrolled severe asthma were identified (57% female; mean age: 62.0 years; 10.0% with CMU-c, Tables S1 and S2, Supplementary File).

A total of 2,217 matched individuals were selected to build the control cohort from the general population (Table S1, Supplementary File). The control asthmatic population (all patients with asthma excluding those with uncontrolled severe asthma) included 739 patients matched to patients with uncontrolled severe asthma using propensity scores (53.0% women; mean age: 63.2 years; 7.7% with CMU-c, Table S2, Supplementary File). The majority of the 45 variables defined for matching were successfully balanced (Table S2 and Figure S2, Supplementary File).

### Mortality

In total, 59 patients with uncontrolled severe asthma died during the 2-year follow-up period. The probability of survival at 2 years in this cohort was 92.0%, which was lower than that observed in the matched control cohort from the general population (96.6%; relative risk [RR] of death: 2.35; 95% CI: 1.70, 3.29;  $P<0.0001$ ). An increased mortality risk was notably seen among those aged 50 to <60 years old (RR: 18.0; 95% CI: 2.2, 148.2), and those aged 60 to <70 years old (RR: 4.1; 95% CI: 1.9, 8.7). While the asthmatic control cohort had a numerically higher survival probability at 2 years than the uncontrolled severe asthmatic cohort, the difference was not significant (94.3% vs. 92.0%;  $P=0.0747$ ). However, the analysis of mortality by age group showed a higher risk of mortality in patients aged 60 to <70 years (8% vs. 2% deaths in uncontrolled severe asthmatic cohort vs. asthmatic control cohort; RR: 4.1; 95% CI: 1.2, 14.0; Figure S3, Supplementary File).

1  
2  
3 Compared with both control cohorts, the increased risk of mortality in uncontrolled severe  
4 asthma cohort was observed early, and became higher during follow-up (Figure 2).  
5  
6  
7

8 Due to a significant interaction between population (uncontrolled severe asthma or general  
9 population) and history of psychiatric disease in the Cox model assessing mortality risk, impact  
10 of population was assessed by history of psychiatric disease, and impact of history of  
11 psychiatric disease was assessed by population (Table S3, Supplementary File). Uncontrolled  
12 severe asthma increased mortality risk, only for patients without history of psychiatric disease  
13 (hazard ratio [HR]: 3.25; 95% CI: 2.14, 4.92). The difference in mortality risk between patients  
14 with uncontrolled severe asthma and general population was not significant in patients with  
15 history of psychiatric disease (HR: 1.22; 95% CI: 0.66, 2.26). Comorbidities (age, history of  
16 cardiovascular disease, diabetes, and cancer) increased mortality risk, especially cancer (HR:  
17 2.40; 95% CI: 1.64, 3.50). Among subjects without history of psychiatric disease, overall  
18 survival was lower in the uncontrolled severe asthmatic cohort compared to general  
19 population, with a difference of 10% at 24 months (Figure S4, Supplementary File).  
20  
21  
22  
23  
24  
25  
26  
27  
28  
29  
30  
31  
32  
33

### 34 **Healthcare utilization**

35 Table 1 shows the level of healthcare utilization for all three cohorts during follow-up. The  
36 proportion of patients requiring medical care in the hospital setting at least once during follow-  
37 up was higher in the uncontrolled severe asthmatic population compared to both control  
38 populations.  
39  
40  
41  
42  
43  
44  
45  
46  
47  
48  
49  
50  
51  
52  
53  
54  
55  
56  
57  
58  
59  
60

**Table 1. Comparison of the results for mortality and main healthcare use per patient during the 2-year follow-up**

|                                                                                        | Cohort of uncontrolled severe asthmatics (N=739) | General population cohort (N=2,217) | P-Value            | Asthmatic control cohort (n=739) | P-Value            |
|----------------------------------------------------------------------------------------|--------------------------------------------------|-------------------------------------|--------------------|----------------------------------|--------------------|
| <b>Deaths, n (%)</b>                                                                   | <b>59 (8.0)</b>                                  | <b>75 (3.4)</b>                     | <b>P&lt;0.0001</b> | <b>42 (5.7)</b>                  | <b>P=0.0747</b>    |
| <b>Deaths by age group, n (%)</b>                                                      |                                                  |                                     |                    |                                  |                    |
| <20                                                                                    | 0 (0.0)                                          | 0 (0.0)                             | P=0.0393           | 0 (0.0)                          | P=0.0366           |
| 20-<30                                                                                 | 0 (0.0)                                          | 1 (1.3)                             |                    | 0 (0.0)                          |                    |
| 30-<40                                                                                 | 0 (0.0)                                          | 1 (1.3)                             |                    | 0 (0.0)                          |                    |
| 40-<50                                                                                 | 0 (0.0)                                          | 1 (1.3)                             |                    | 0 (0.0)                          |                    |
| 50-<60                                                                                 | 6 (10.2)                                         | 1 (1.3)                             |                    | 1 (2.4)                          |                    |
| 60-<70                                                                                 | 15 (25.4)                                        | 11 (14.7)                           |                    | 3 (7.1)                          |                    |
| 70-<80                                                                                 | 14 (23.7)                                        | 16 (21.3)                           |                    | 10 (23.8)                        |                    |
| 80-<90                                                                                 | 15 (25.4)                                        | 20 (26.7)                           |                    | 16 (38.1)                        |                    |
| ≥90                                                                                    | 9 (15.3)                                         | 24 (32.0)                           |                    | 12 (28.6)                        |                    |
| <b>Mean age at death (σ)</b>                                                           | <b>76.1 (12.5)</b>                               | <b>79.7 (14.5)</b>                  |                    | P=0.0266                         |                    |
| Min-max                                                                                | 51.0-102.0                                       | 25.0-100.0                          | 55.0-102.0         |                                  |                    |
| <b>At least 1 medical care act done at hospital, n (%)</b>                             | <b>478 (64.7)</b>                                | <b>774 (34.9)</b>                   | <b>P&lt;0.0001</b> | <b>408 (55.2)</b>                | <b>P=0.0002</b>    |
| ED visit                                                                               | 318 (43.0)                                       | 465 (21.0)                          | P<0.0001           | 247 (33.4)                       | P=0.0002           |
| All-cause hospitalization                                                              | 409 (55.3)                                       | 556 (25.1)                          | P<0.0001           | 349 (47.2)                       | P=0.0023           |
| Asthma-related hospitalizations (asthma and severe exacerbation) <sup>a</sup>          | 27 (3.7)                                         | 0 (0.0)                             | NA                 | 12 (1.6)                         | P=0.0163           |
| Asthma-related hospitalizations with at least 1 visit in intensive care unit           | 3 (0.4)                                          | 0 (0.0)                             | NA                 | 1 (0.1)                          | 0.3173             |
| <b>At least 1 medical visit during follow-up, n (%)</b>                                | <b>708 (95.8)</b>                                | <b>1,995 (90.0)</b>                 | <b>P&lt;0.0001</b> | <b>709 (95.9)</b>                | <b>P=0.8981</b>    |
| General practitioner                                                                   | 602 (81.5)                                       | 1,628 (73.4)                        | P<0.0001           | 620 (83.9)                       | P=0.2185           |
| Respiratory specialist                                                                 | 94 (12.7)                                        | 53 (2.4)                            | P<0.0001           | 42 (5.7)                         | P<0.0001           |
| Ear-nose-throat specialist                                                             | 67 (9.1)                                         | 122 (5.5)                           | P<0.0001           | 37 (5.0)                         | P=0.0030           |
| <b>At least 1 paramedical visit during follow-up, n (%)</b>                            | <b>600 (81.2)</b>                                | <b>1,390 (62.7)</b>                 | <b>P&lt;0.0001</b> | <b>546 (73.9)</b>                | <b>P=0.0011</b>    |
| Nurse consultation                                                                     | 531 (71.9)                                       | 1,184 (53.4)                        | P<0.0001           | 496 (66.7)                       | P=0.0353           |
| Physiotherapy consultation                                                             | 320 (43.3)                                       | 673 (30.4)                          | P<0.0001           | 259 (35.0)                       | P=0.0013           |
| <b>At least 1 filled prescription for an asthma medication during follow-up, n (%)</b> | <b>726 (98.2)</b>                                | <b>257 (11.6)</b>                   | <b>P&lt;0.0001</b> | <b>638 (86.3)</b>                | <b>P&lt;0.0001</b> |
| Short-acting bronchodilator                                                            | 606 (82.0)                                       | 100 (4.5)                           | P<0.0001           | 396 (53.6)                       | P<0.0001           |
| Long-acting bronchodilator: LAMA/LABA                                                  | 316 (42.8)                                       | 53 (2.4)                            | P=0.0004           | 190 (25.7)                       | P<0.0001           |
| Long-acting bronchodilator: xanthines                                                  | 56 (7.6)                                         | 2 (0.1)                             | P<0.0001           | 10 (1.4)                         | P<0.0001           |
| Anti-inflammatory medication (ICS ± OCS)                                               | 506 (68.5)                                       | 115 (5.2)                           | P<0.0001           | 273 (36.9)                       | P<0.0001           |
| Anti-inflammatory medication (ICS ± OCS) and long-acting bronchodilator                | 626 (84.7)                                       | 128 (5.8)                           | P<0.0001           | 413 (55.9)                       | P<0.0001           |

|                                                                                                                                         | Cohort of uncontrolled severe asthmatics (N=739) | General population cohort (N=2,217) | P-Value                   | Asthmatic control cohort (n=739) | P-Value                   |
|-----------------------------------------------------------------------------------------------------------------------------------------|--------------------------------------------------|-------------------------------------|---------------------------|----------------------------------|---------------------------|
| At least 1 visit to a GP, respiratory specialist, or allergy specialist, followed within 10 days by a filled prescription of OCS, n (%) | 481 (65.1)                                       | 447 (20.2)                          | <i>P</i> <0.0001          | 229 (31.0)                       | <i>P</i> <0.0001          |
| At least 1 filled prescription of a medication of interest during follow-up, n (%)                                                      | <b>727 (98.4)</b>                                | <b>1,847 (83.3)</b>                 | <b><i>P</i>&lt;0.0001</b> | <b>678 (91.7)</b>                | <b><i>P</i>&lt;0.0001</b> |
| Intranasal antihistamines                                                                                                               | 22 (3.0)                                         | 13 (0.6)                            | <i>P</i> <0.0001          | 10 (1.4)                         | <i>P</i> =0.0339          |
| Ocular antihistamines                                                                                                                   | 43 (5.8)                                         | 80 (3.6)                            | <i>P</i> =0.0004          | 27 (3.7)                         | <i>P</i> =0.0523          |
| Systemic antihistamines                                                                                                                 | 488 (66.0)                                       | 675 (30.4)                          | <i>P</i> <0.0001          | 273 (36.9)                       | <i>P</i> <0.0001          |
| Intranasal corticosteroids                                                                                                              | 420 (56.8)                                       | 567 (25.6)                          | <i>P</i> <0.0001          | 230 (31.1)                       | <i>P</i> <0.0001          |
| Nonsteroidal anti-inflammatory drugs                                                                                                    | 407 (55.1)                                       | 1,083 (48.8)                        | <i>P</i> <0.0001          | 317 (42.9)                       | <i>P</i> <0.0001          |
| Antibiotics                                                                                                                             | 670 (90.7)                                       | 1,323 (59.7)                        | <i>P</i> <0.0001          | 501 (67.8)                       | <i>P</i> <0.0001          |
| Proton-pump inhibitors                                                                                                                  | 506 (68.5)                                       | 980 (44.2)                          | <i>P</i> <0.0001          | 348 (47.1)                       | <i>P</i> <0.0001          |
| Psychotropic drugs                                                                                                                      | 426 (57.6)                                       | 840 (37.9)                          | <i>P</i> <0.0001          | 320 (43.3)                       | <i>P</i> <0.0001          |
| Topical corticosteroids                                                                                                                 | 235 (31.8)                                       | 512 (23.1)                          | <i>P</i> <0.0001          | 145 (19.6)                       | <i>P</i> <0.0001          |
| Topical immunosuppressants                                                                                                              | 2 (0.3%)                                         | 1 (0.0)                             | <i>P</i> =0.0588          | 0 (0.0%)                         | NA                        |

<sup>a</sup> Excluding stays of less than 1 night (or Z codes).

Key: ED – emergency department; GP – general practitioner; ICS – inhaled corticosteroid; LABA – long-acting  $\beta$ 2-agonist; LAMA – long-acting muscarinic antagonist; NA – not applicable; OCS – oral corticosteroid.

1  
2  
3 A 2-fold increase in ED visits and all-cause or asthma-related hospitalizations was observed  
4 for patients with uncontrolled severe asthma compared with the general population  
5 (64.7% vs. 34.9%;  $P<0.0001$ ). Patients with uncontrolled severe asthma also had an  
6 increased use of other main components of care, such as medical visits (95.8% vs. 90.0%;  
7  $P<0.0001$ ) and paramedical visits (81.2% vs. 62.7%;  $P<0.0001$ ) compared with the general  
8 population. An increased healthcare use was also highlighted in comparison with the  
9 asthmatic cohort, since patients with uncontrolled severe asthma had more ED visits and  
10 hospitalizations (64.7% vs. 55.2%;  $P=0.0002$ ), and paramedical visits (81.2% vs. 73.9%;  
11  $P=0.0011$ ), compared with asthmatic controls.

12  
13  
14 For drug prescriptions, the proportion of patients receiving medications was higher in patients  
15 with uncontrolled severe asthma compared with matched individuals from the general  
16 population cohort, both in terms of asthma-related treatments including oral corticosteroid  
17 therapy (98.2% vs. 11.6%;  $P<0.0001$ ), and other treatments, such as antibiotics, nonsteroidal  
18 anti-inflammatory drugs, and psychotropic drugs (98.4% vs. 83.3%;  $P<0.0001$ ). Patients with  
19 uncontrolled severe asthma also had higher medication use than the asthmatic controls both  
20 for asthma-related treatments (98.2% vs. 86.3%;  $P<0.0001$ ), and other medications (98.4%  
21 vs. 91.7%;  $P<0.0001$ ).

### 22 23 24 25 26 27 28 29 30 31 32 33 34 35 36 37 38 39 40 41 **Costs**

42 Increase of healthcare use was translated into higher costs. Healthcare use mean costs per  
43 patient during the 2-year follow-up were higher for patients with uncontrolled severe asthma  
44 (€14,020) compared to the general population (€3,564;  $P<0.0001$ ) or asthmatic controls  
45 (€6,418;  $P<0.0001$ ), regardless of the expenditure (Table 2).  
46  
47  
48  
49  
50  
51  
52  
53  
54  
55  
56  
57  
58  
59  
60

**Table 2. Comparison of costs (reimbursement amounts, in Euros) associated with hospital and outpatient use, per patient, over a 2-year period after the index date (patients with uncontrolled severe asthma vs. general population and asthmatic control cohorts)**

|                                  | Costs per patient                 | Cohort of patients with uncontrolled severe asthma (N=739) | General population cohort (N=2,217) | P-Value          | Asthmatic control cohort (n=739) | P-Value          |
|----------------------------------|-----------------------------------|------------------------------------------------------------|-------------------------------------|------------------|----------------------------------|------------------|
| Hospitalization                  | Mean ( $\sigma$ )                 | 8,163 (20,669)                                             | 1,800 (7,991)                       | <i>P</i> <0.0001 | 3,589 (13,702)                   | <i>P</i> <0.0001 |
|                                  | Median                            | 426 (0 - 5,854)                                            | 0 (0 - 0)                           |                  | 0 (0 - 1,284)                    |                  |
|                                  | Min-max                           | 0 - 246,483                                                | 0 - 176,423                         |                  | 0 - 190,457                      |                  |
| ED visit without hospitalization | Mean ( $\sigma$ )                 | 12 (28)                                                    | 6 (18)                              | <i>P</i> <0.0001 | 9 (33)                           | <i>P</i> <0.0001 |
|                                  | Median (Q1-Q3)                    | 0 (0 - 25)                                                 | 0 (0 - 0)                           |                  | 0 (0 - 0)                        |                  |
|                                  | Min-max                           | 0 - 319                                                    | 0 - 273                             |                  | 0 - 671                          |                  |
| Medical visits                   | Mean ( $\sigma$ )                 | 643 (1,068)                                                | 368 (437)                           | <i>P</i> <0.0001 | 496 (658)                        | <i>P</i> <0.0001 |
|                                  | Median (Q1-Q3)                    | 491 (278 - 786)                                            | 265 (113 - 499)                     |                  | 376 (217 - 612)                  |                  |
|                                  | Min-max                           | 0 - 24,882                                                 | 0 - 6,861                           |                  | 0 - 11,547                       |                  |
| Laboratory tests                 | Mean ( $\sigma$ )                 | 241 (321)                                                  | 154 (266)                           | <i>P</i> <0.0001 | 203 (285)                        | <i>P</i> =0.0131 |
|                                  | Median (Q1-Q3)                    | 145 (53 - 295)                                             | 85 (0 - 180)                        |                  | 126 (54 - 237)                   |                  |
|                                  | Min-max                           | 0 - 3,137                                                  | 0 - 5,727                           |                  | 0 - 2,461                        |                  |
| Paramedical visits               | Mean ( $\sigma$ )                 | 1,406 (4,827)                                              | 747 (2,986)                         | <i>P</i> <0.0001 | 968 (3,236)                      | <i>P</i> <0.0001 |
|                                  | Median (Q1-Q3)                    | 176 (12 - 689)                                             | 18 (0 - 288)                        |                  | 42 (0 - 469)                     |                  |
|                                  | Min-max                           | 0 - 65,527                                                 | 0 - 50,060                          |                  | 0 - 36,145                       |                  |
| Medications                      | Mean ( $\sigma$ )                 | 3,076 (9,131)                                              | 199 (410)                           | <i>P</i> <0.0001 | 721 (747)                        | <i>P</i> <0.0001 |
|                                  | Median (Q1-Q3)                    | 1,525 (1,037 - 2,185)                                      | 58 (12 - 220)                       |                  | 523 (246 - 957)                  |                  |
|                                  | Min-max                           | 0 - 95,453                                                 | 0 - 5,855                           |                  | 0 - 9,472                        |                  |
| <b>Total costs</b>               | <b>Mean (<math>\sigma</math>)</b> | <b>14,020 (24,076)</b>                                     | <b>3,564 (9,540)</b>                | <i>P</i> <0.0001 | <b>6,418 (15,109)</b>            | <i>P</i> <0.0001 |
|                                  | <b>Median (Q1-Q3)</b>             | <b>4,625 (2,492 - 13,897)</b>                              | <b>825 (297 - 2,286)</b>            |                  | <b>1,905 (1,020 - 4,906)</b>     |                  |
|                                  | <b>Min-max</b>                    | <b>105 - 253,160</b>                                       | <b>0 - 190,380</b>                  |                  | <b>0 - 193,294</b>               |                  |

Key: ED – emergency department.



1  
2  
3 The average cost of a patient with uncontrolled severe asthma who died was significantly  
4 higher than that of a surviving patient (€28,009 vs. €11,851;  $P<0.0001$ ). Primary drivers of this  
5 increase in patients with uncontrolled severe asthma were hospitalizations (5-fold and 2-fold  
6 increases vs. the general and asthmatic populations, respectively), drugs of interest (16-fold  
7 and 4-fold increases vs. the general and asthmatic populations, respectively), and  
8 paramedical fees (2-fold and 1.4-fold increases vs. the general and asthmatic populations,  
9 respectively).  
10  
11  
12  
13  
14  
15  
16  
17  
18  
19  
20  
21  
22  
23  
24  
25  
26  
27  
28  
29  
30  
31  
32  
33  
34  
35  
36  
37  
38  
39  
40  
41  
42  
43  
44  
45  
46  
47  
48  
49  
50  
51  
52  
53  
54  
55  
56  
57  
58  
59  
60

For peer review only

## DISCUSSION

Given the lack of recent data assessing the impact of uncontrolled severe asthma on public health, the RESONANCE study provided important data characterizing this population and comparing it to the general and asthmatic populations in terms of morbidity and mortality, as well as healthcare use and associated costs. To our knowledge, this is the first study to specifically compare patients with uncontrolled severe asthma with the overall asthmatic population, in the French population.

The clinical burden of uncontrolled severe asthma was demonstrated through the increased risk of mortality, use of additional treatments (asthma-related treatment and other associated treatments), and hospitalizations during the 2-year follow-up period in comparison with matched patients from the general and asthmatic populations. The average cost of uncontrolled severe asthma for healthcare system during the 2 years of follow-up represented nearly 4 times (mean cost difference of €10,456 per patient) and more than 2 times (mean cost difference of €7,602 per patient) that of matched patients from the general population and from asthmatic control cohort, respectively, over the same period. *Bourdin et al.* found an annually incremental cost of \$5,276 for healthcare system when comparing patients with severe asthma with the general population, although a 2-year extrapolation would be biased due to the non-annual rate of care seeking in the study population.[12] However, no specific assessment of uncontrolled severe asthma was performed.

Hospitalizations were the main driver of healthcare use and costs, in agreement with other studies assessing the economic burden of asthma.[4,7,14] Costs during follow-up could have been influenced by the cost of hospitalization occurring at index date, since hospitalization related to asthma was part of the selection criteria to identify asthma non-control; however, influence of this phenomenon was limited since only 5.1% of patients were selected based solely on this criterion.

1  
2  
3 This study highlighted the excess of healthcare costs during the last months of life in  
4 uncontrolled severe asthma, accounting for part of the excess cost associated with this  
5 condition overall, given their higher mortality rate during the follow-up period.  
6  
7  
8  
9

10 Our study also assessed the size of the uncontrolled severe asthma population. The 739  
11 patients identified among the total population of 16,588 patients with asthma suggest that this  
12 small but high-risk population represented 4.5% of all patients with asthma in France in 2014.  
13  
14 When extrapolating to the entire adolescent and adult French population, this represents a  
15 prevalence of 0.15% (*i.e.*, 86,342 patients; 95% CI: 80,341, 92,789), which is slightly lower  
16 than other severe asthma populational estimates that used different definitions of asthma  
17 severity and did not account for asthma non-control.[12,15]  
18  
19  
20  
21  
22  
23  
24  
25

26 The uncontrolled severe asthmatic population was identified by means of a comprehensive  
27 algorithm, with great care in the definitions of asthma, severity, and control to ensure the  
28 accuracy of the cohorts and palliate the lack of clinical data. Asthma was defined with robust  
29 data, such as asthma-related hospitalizations and complications, asthma-related full coverage  
30 for a long-term condition, and specific treatments.  
31  
32  
33  
34  
35  
36  
37

38 Two cohorts were compared with patients with uncontrolled severe asthma. The objective of  
39 the general population control cohort was to highlight the absolute burden of uncontrolled  
40 severe asthma in the population. Matching on key sociodemographic characteristics aimed to  
41 control for potential confounding bias and ensure comparability between populations, which  
42 was confirmed by acceptable standardized differences. In addition, a Cox regression model  
43 was developed in post-hoc analysis to compare mortality risk between the uncontrolled severe  
44 asthmatic cohort and the general population: uncontrolled severe asthma was associated with  
45 increased mortality, only for patients without history of psychiatric disease. This increased risk  
46 was not found in patients with history of psychiatric disease, however the statistical model was  
47 only adjusted for age, history of cardiovascular disease, diabetes, and cancer but not for other  
48  
49  
50  
51  
52  
53  
54  
55  
56  
57  
58  
59  
60

1  
2  
3 potential confounders such as psychotropic drugs use since we did not aim at assessing  
4 factors associated with mortality in subjects with a history of psychiatric disease.  
5  
6

7  
8 The asthmatic control cohort was selected and matched with patients with uncontrolled severe  
9 asthma using propensity scores to control potential confounders, using all available and  
10 relevant variables. A conservative approach was used, since some potential confounders  
11 included in propensity scores may be preponderant in patients with uncontrolled severe  
12 asthma, leading to a potential minimization of the burden of asthma lack of control and  
13 severity. More, given that this control population includes severe but controlled or non-  
14 controlled but non-severe patients with asthma, it is not a population exclusively comprising  
15 low-risk patients.  
16  
17  
18  
19  
20  
21  
22  
23  
24  
25

26 The study was conducted using the EGB, a well-recognized and robust populational medical  
27 administrative database that confers many advantages, such as the completeness of mortality  
28 data and comprehensiveness of healthcare reimbursed for all patients. Of note, the EGB does  
29 not include clinical information such as visit reason, diagnoses made outside hospitals,  
30 biological test results, or patients' anthropometric data.  
31  
32  
33  
34  
35  
36

37 The challenges associated with the use of administrative databases have been well  
38 documented. [16] In this study, the difficulties in selecting the patients with uncontrolled severe  
39 asthma were associated with potential measurement bias related to coding errors in hospital  
40 diagnoses; this source of error is likely limited and non-differential between groups. The  
41 algorithms assumed that filled prescriptions were proxies to treatment use; however, it is not  
42 possible to confirm that a filled prescription has been taken.  
43  
44  
45  
46  
47  
48  
49

50 Potential indications of asthma treatments for other chronic pulmonary diseases such as  
51 COPD were accounted for, since an exclusion criterion based on ALD declarations or  
52 hospitalizations related to other chronic pulmonary diseases was considered. Despite this,  
53 some COPD patients may still have been included given the relatively old age of the asthmatic  
54 cohorts. This would have occurred if ALD for COPD has not been declared, or if a patient has  
55  
56  
57  
58  
59  
60

1  
2  
3 never been hospitalized during the last 5 years. Criterion requiring continuous insurance  
4 coverage may have resulted in a lower number of younger patients being included due to  
5 student-specific insurance offered during school years; however, the impact of this limit on the  
6 results is likely minimal.  
7  
8  
9

10  
11  
12 Patients have been assigned to their group of interest (uncontrolled severe asthma, other  
13 patients with asthma, general population) at index date. Some patients may have evolved from  
14 non-asthma to asthma, or from asthma to uncontrolled severe asthma during follow-up and  
15 this was not considered in statistical analyses. However, given the duration of follow-up of two  
16 years, impact of such misclassification of patients during follow-up is probably limited.  
17  
18  
19  
20  
21  
22

23  
24 The EGB offers the advantage of a limited number of patients lost to follow-up given the  
25 universal healthcare system present in France. It also has a few limits: while most patients  
26 were covered by the general scheme, patients covered by other plans may have not been  
27 selected due to the later integration of those plans in the EGB. Also, the algorithms used to  
28 define asthma and uncontrolled asthma excluded patients who died at the hospital around the  
29 time of index date, thereby potentially excluding the most severe and uncontrolled patients.  
30  
31  
32  
33  
34  
35  
36  
37 Finally, additional residual confounding factors may persist despite the matching processes.  
38  
39

40 This large study allowing the comparison between patients with uncontrolled severe asthma  
41 and other patients with asthma and the general population, highlighted that severe asthma  
42 associated with non-control significantly affects mortality, healthcare use, and associated  
43 costs. This study emphasizes that close attention should be paid to ensure appropriate  
44 management of patients with severe asthma and monitoring of the level of control of asthma  
45 symptoms.  
46  
47  
48  
49  
50  
51  
52  
53  
54  
55  
56  
57  
58  
59  
60

## CONCLUSIONS

This database study demonstrates the huge burden of uncontrolled severe asthma in terms of mortality, morbidity, and healthcare resource consumption compared to other patients with asthma and the general population. These findings emphasize the importance of appropriate management in this high-risk population.

For peer review only

1  
2  
3 **Acknowledgments** The authors gratefully acknowledge the assistance of Anaïs Havet,  
4 (PharmD, PhD) and Lucile Dheyriat (PharmD), of stève consultants for assistance in drafting  
5 of this manuscript, which was funded by Sanofi.  
6  
7  
8  
9

10 **Contributors** All authors participated in the interpretation of the data, provided critical  
11 feedback and final approval for submission, and took responsibility for the accuracy,  
12 completeness, and protocol adherence of data and analyses. Stève Bénard had full access to  
13 all of the data in the study and takes responsibility for the integrity of the data and the accuracy  
14 of the data analysis. Concept and design: all authors. Acquisition, analysis, or interpretation  
15 of data: all authors. Drafting of the manuscript: de Larrard and Bénard. Critical revision of the  
16 manuscript for important intellectual content: Roche, Demoly, Garcia, Cancalon, Perez,  
17 Mahieu and Vieu. Statistical analysis: de Larrard, Bénard and Cancalon. Administrative,  
18 technical, or material support: Bénard, Perez, Mahieu and Vieu. Supervision: all authors.  
19  
20  
21  
22  
23  
24  
25  
26

27 **Funding** This work was supported by Sanofi-Aventis France.  
28  
29

30 **Competing interests** Pr Pascal Demoly has received honoraria and/or research grants from  
31 ALK, Mylan-Viatrix, Stallergènes, ThermoFisher Scientific, AstraZeneca, GSK, Novartis,  
32 Ménarini, and Regeneron. Pr Gilles Garcia has received honoraria from ALK, Novartis,  
33 AstraZeneca, GSK, Sanofi and Chiesi for conferences or advisory board meetings. Pr Nicolas  
34 Roche has received research funding from Boehringer Ingelheim, GSK, Pfizer and Novartis  
35 and honoraria from Boehringer Ingelheim, Pfizer, Novartis, Teva, GSK, AstraZeneca, Chiesi,  
36 Sanofi, and Zambon. Laurine Vieu, Aymeric Mahieu, Vincent Perez are Sanofi employee and  
37 may hold shares and/or stock options in the company. No other disclosures were reported.  
38  
39  
40  
41  
42  
43

44 **Patient consent for publication** Not required.  
45  
46

47 **Data availability statement** No additional data available.  
48  
49  
50  
51  
52  
53  
54  
55  
56  
57  
58  
59  
60

## REFERENCES

- 1 Busse WW, Banks-Schlegel S, Wenzel SE. Pathophysiology of severe asthma. *J Allergy Clin Immunol* 2000;106:1033–42. doi:10.1067/mai.2000.111307
- 2 Israel E, Reddel HK. Severe and Difficult-to-Treat Asthma in Adults. *N Engl J Med* 2017;377:965–76. doi:10.1056/NEJMra1608969
- 3 Yaghoubi M, Adibi A, Safari A, *et al.* The Projected Economic and Health Burden of Uncontrolled Asthma in the United States. *Am J Respir Crit Care Med* 2019;200:1102–12. doi:10.1164/rccm.201901-0016OC
- 4 O'Neill S, Sweeney J, Patterson CC, *et al.* The cost of treating severe refractory asthma in the UK: an economic analysis from the British Thoracic Society Difficult Asthma Registry. *Thorax* 2015;70:376–8. doi:10.1136/thoraxjnl-2013-204114
- 5 Godard P, Chanez P, Siraudin L, *et al.* Costs of asthma are correlated with severity: a 1-yr prospective study. *Eur Respir J* 2002;19:61–7. doi:10.1183/09031936.02.00232001
- 6 Chastek B, Korrer S, Nagar SP, *et al.* Economic Burden of Illness Among Patients with Severe Asthma in a Managed Care Setting. *J Manag Care Spec Pharm* 2016;22:848–61. doi:10.18553/jmcp.2016.22.7.848
- 7 Bahadori K, Doyle-Waters MM, Marra C, *et al.* Economic burden of asthma: a systematic review. *BMC Pulm Med* 2009;9:24. doi:10.1186/1471-2466-9-24
- 8 Moulis G, Lapeyre-Mestre M, Palmaro A, *et al.* French health insurance databases: What interest for medical research? *Rev Med Interne* 2015;36:411–7. doi:10.1016/j.revmed.2014.11.009
- 9 Bezin J, Duong M, Lassalle R, *et al.* The national healthcare system claims databases in France, SNIIRAM and EGB: Powerful tools for pharmacoepidemiology. *Pharmacoepidemiol Drug Saf* 2017;26:954–62. doi:10.1002/pds.4233
- 10 Catherine Quantin and Caisse nationale d'Assurance maladie des travailleurs salariés (CNAMTS). Etude des algorithmes de définition de pathologies dans le système national d'information inter-régimes de l'assurance maladie (SNIIRAM). Deuxième partie: Recensement des équipes utilisant les données du SNIIRAM, ainsi que des algorithmes d'identification de pathologies et des travaux publiés. Aug 2015. [https://assurance-maladie.ameli.fr/sites/default/files/2014\\_etude-algorithmes-definition-pathologies-partie-2\\_cartographie.pdf](https://assurance-maladie.ameli.fr/sites/default/files/2014_etude-algorithmes-definition-pathologies-partie-2_cartographie.pdf). Accessed November, 2021.
- 11 Catherine Quantin and Caisse nationale d'Assurance maladie des travailleurs salariés (CNAMTS). Etude des algorithmes de définition de pathologies dans le système national d'information inter-régimes de l'assurance maladie (SNIIRAM). Première partie: Les algorithmes d'identification de pathologies utilisés par la cartographie des patients et des dépenses, développée par la Caisse nationale de l'Assurance maladie des travailleurs salariés. Aug 2015. [https://assurance-maladie.ameli.fr/sites/default/files/2014\\_etude-algorithmes-definition-pathologies-partie-1\\_cartographie.pdf](https://assurance-maladie.ameli.fr/sites/default/files/2014_etude-algorithmes-definition-pathologies-partie-1_cartographie.pdf). Accessed November, 2021.
- 12 Bourdin A, Fabry-Vendrand C, Ostinelli J, *et al.* The Burden of Severe Asthma in France: A Case-Control Study Using a Medical Claims Database. *J Allergy Clin Immunol Pract* 2019;7:1477–87. doi:10.1016/j.jaip.2018.12.029
- 13 Global Initiative for Asthma. 2018 GINA Report: Global Strategy for Asthma Management and Prevention; pp.35-88. <https://ginasthma.org/wp-content/uploads/2018/04/wms-GINA-2018-report-V1.3-002.pdf>. Accessed November, 2021.



1  
2  
3 14 Jalaludin BB, Smith MA, Chey T, *et al.* Risk factors for asthma deaths: a population-  
4 based, case-control study. *Aust N Z J Public Health* 1999;23:595–600. doi:10.1111/j.1467-  
5 842x.1999.tb01543.x

6  
7 15 Enquête Santé et Protection Sociale (ESPS). Corrélations entre asthme déclaré et  
8 remboursements de médicaments dans l'enquête ESPS 2006. 2012.  
9 [https://www.santepubliquefrance.fr/maladies-et-traumatismes/maladies-et-infections-](https://www.santepubliquefrance.fr/maladies-et-traumatismes/maladies-et-infections-respiratoires/asthme/documents/rapport-synthese/correlations-entre-asthme-declare-et-remboursements-de-medicaments-dans-l-enquete-esps-2006.-peut-on-proposer-des-indicateurs-de-suivi-de-la-prise)  
10 [respiratoires/asthme/documents/rapport-synthese/correlations-entre-asthme-declare-et-](https://www.santepubliquefrance.fr/maladies-et-traumatismes/maladies-et-infections-respiratoires/asthme/documents/rapport-synthese/correlations-entre-asthme-declare-et-remboursements-de-medicaments-dans-l-enquete-esps-2006.-peut-on-proposer-des-indicateurs-de-suivi-de-la-prise)  
11 [remboursements-de-medicaments-dans-l-enquete-esps-2006.-peut-on-proposer-des-](https://www.santepubliquefrance.fr/maladies-et-traumatismes/maladies-et-infections-respiratoires/asthme/documents/rapport-synthese/correlations-entre-asthme-declare-et-remboursements-de-medicaments-dans-l-enquete-esps-2006.-peut-on-proposer-des-indicateurs-de-suivi-de-la-prise)  
12 [indicateurs-de-suivi-de-la-prise](https://www.santepubliquefrance.fr/maladies-et-traumatismes/maladies-et-infections-respiratoires/asthme/documents/rapport-synthese/correlations-entre-asthme-declare-et-remboursements-de-medicaments-dans-l-enquete-esps-2006.-peut-on-proposer-des-indicateurs-de-suivi-de-la-prise). Accessed November, 2021.

13  
14 16 Jacob C, Haas JS, Bechtel B, *et al.* Assessing asthma severity based on claims data:  
15 a systematic review. *Eur J Health Econ* 2017;18:227–41. doi:10.1007/s10198-016-0769-2.  
16  
17  
18  
19  
20  
21  
22  
23  
24  
25  
26  
27  
28  
29  
30  
31  
32  
33  
34  
35  
36  
37  
38  
39  
40  
41  
42  
43  
44  
45  
46  
47  
48  
49  
50  
51  
52  
53  
54  
55  
56  
57  
58  
59  
60

For peer review only

## LIST OF FIGURE TITLES

Figure 1. RESONANCE study design

Figure 2. 24-month survival for the uncontrolled severe asthmatic cohort vs. general population and asthmatic control cohorts

For peer review only

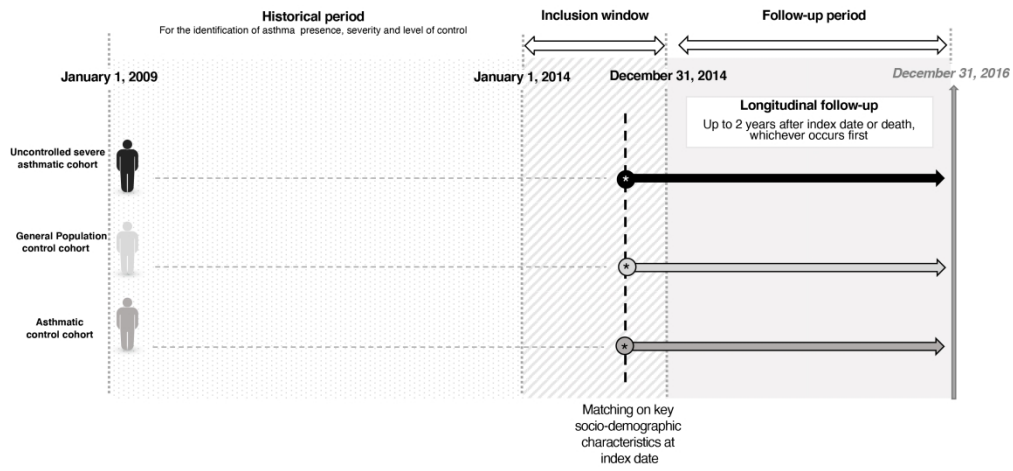

FIGURE 1. RESONANCE study design

286x137mm (300 x 300 DPI)



FIGURE 2. 24-month survival for the uncontrolled severe asthmatic cohort vs. general population and asthmatic control cohorts

166x119mm (300 x 300 DPI)

## Real-life impact of uncontrolled severe asthma on mortality and healthcare use in adolescents and adults: findings from the retrospective observational RESONANCE study in France

Nicolas Roche<sup>1</sup>, Gilles Garcia<sup>2</sup>, Alexandre de Larrard<sup>3</sup>, Charlotte Cancalon<sup>3</sup>, Stève Bénard<sup>3</sup>, Vincent Perez<sup>4</sup>, Aymeric Mahieu<sup>4</sup>, Laurine Vieu<sup>4</sup>, Pascal Demoly<sup>5</sup>

### Supplementary materials

#### FIGURE S1. Patient selection algorithm

Key: ALD – affection de longue durée (long-term condition); ATC – Anatomical Therapeutic Chemical; COPD – chronic obstructive pulmonary disease; ICD-10 – International Classification of Diseases, 10th Revision; ICS – inhaled corticosteroid; LABA – long-acting  $\beta$ 2-agonist; LAMA – long-acting muscarinic antagonist; OCS – oral corticosteroid; SABA – short-acting  $\beta$ 2-agonist.

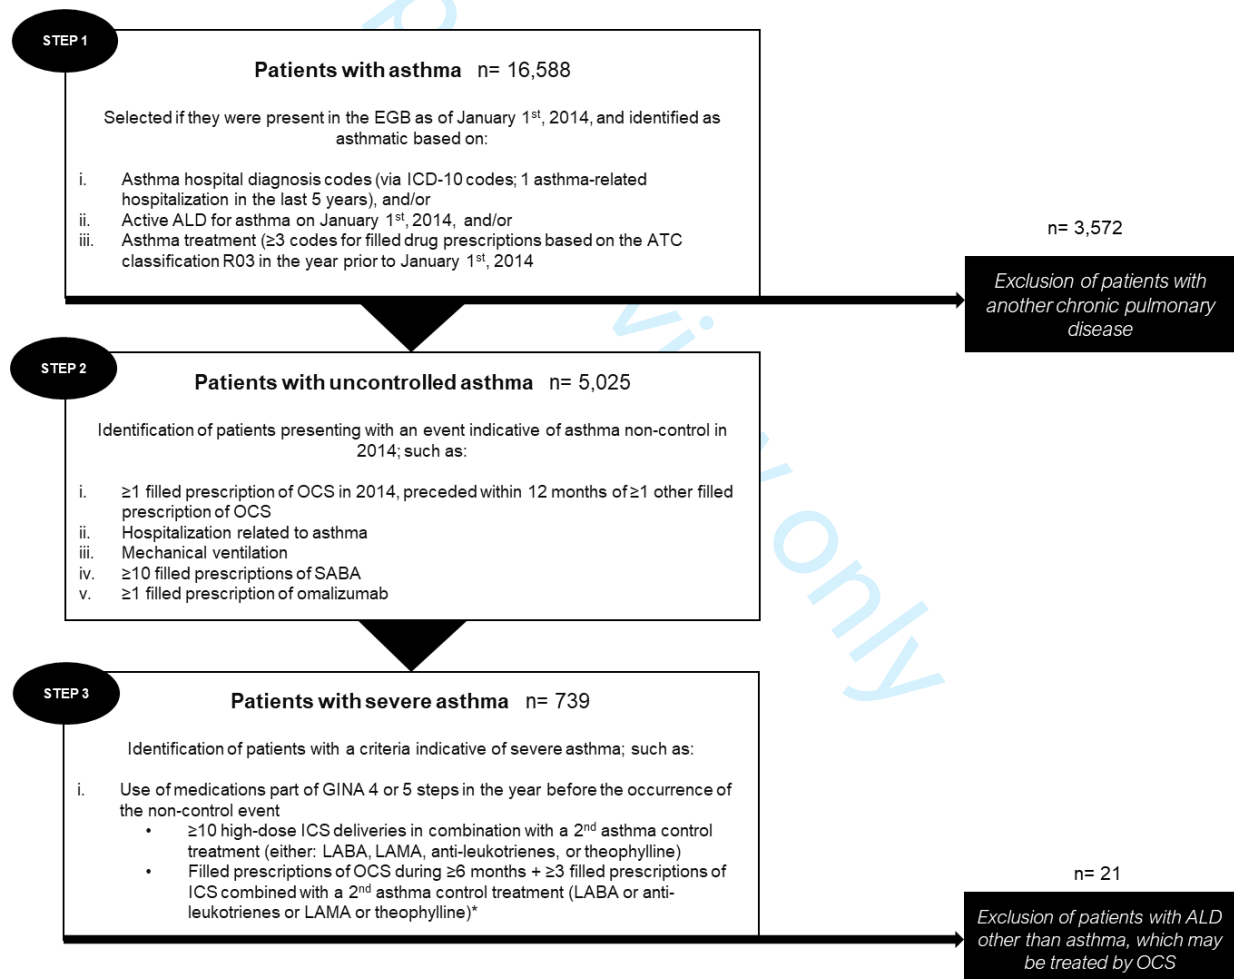

**Footnote:**

\* Of note, these criteria did not apply to patients with an ALD other than asthma (i.e. rheumatoid arthritis, ulcerative colitis, Crohn's disease, cancer, etc) who can be treated by OCS identified by an exploratory analysis of ALD of patients from the target population meeting criterion.

## Methods – Additional details on drugs of interest

### Asthma treatments:

- short-acting beta2-agonists (SABA),
- long-acting beta2-agonists (LABA),
- long-acting anticholinergics (LAMA),
- antileukotriene receptor antagonists (LTRA),
- xanthines,
- inhaled and oral corticosteroids (ICS and OCS),
- combination treatments.

### Other drug classes of interest:

- nasal antihistamines,
- antihistamines,
- nonsteroidal anti-inflammatory drugs (NSAIDs),
- antibiotics,
- proton pump inhibitors (PPIs),
- psychotropic drugs,
- topical corticosteroids,
- topical immunosuppressants.

## Methods – ICD-10 codes used

### For Asthma definition

- J45.0 Predominantly allergic asthma
- J45.1 Non-allergic asthma
- J45.8 Mixed asthma
- J45.9 Asthma, Unspecified
- J46 Status asthmaticus
- J96 Respiratory failure, not elsewhere classified

### For Other chronic pulmonary disease definition

- J41 Simple and mucopurulent chronic bronchitis
- J42 Unspecified chronic bronchitis
- J43 Emphysema
- J44 Other chronic obstructive pulmonary disease
- J47 Bronchiectasis
- J61 Pneumoconiosis due to asbestos and other mineral fiber
- J62.8 Pneumoconiosis due to other dust containing silica
- J68.0 Bronchitis due to chemicals, gases, fumes and vapors
- E84 Mucoviscidosis
- J92.0 Pleural plaque with presence of asbestos
- J94.8 Other specified pleural conditions
- J96.1+0 Insuffisance respiratoire chronique obstructive

**Methods – Variables defined for propensity score matching**

1. nasal corticosteroid (Yes/No)
2. systemic antihistamine (Yes/No)
3. non-steroidal anti-inflammatory drugs (Yes/No)
4. antibiotic (Yes/No)
5. proton pump inhibitor (Yes/No)
6. dermocorticoids (Yes/No)
7. psychotropic drug (Yes/No)
8. age (years)
9. number of outpatient consultations
10. charlson's score
11. consultation with a nurse (Yes/No)
12. cardio-vascular diseases (Yes/No)
13. ocular antihistamine (Yes/No)
14. hypertension (Yes/No)
15. osteoporosis (Yes/No)
16. number of consultations with a physiotherapist
17. consultations with a physiotherapist (Yes/No)
18. depression (Yes/No)
19. psychiatric illness (Yes/No)
20. number of emergency room visits
21. hospitalization (Yes/No)
22. number of consultations with a nurse
23. emergency room visits (Yes/No)
24. number of hospitalizations
25. nasal antihistamine (Yes/No)
26. cataract (Yes/No)
27. nasal polyposis (Yes/No)
28. number of hospital consultations
29. gastroesophageal reflux (Yes/No)
30. dyslipidemia (Yes/No)
31. arrhythmia (Yes/No)
32. hospital consultations (Yes/No)
33. cerebrovascular diseases (Yes/No)
34. anxiety (Yes/No)
35. rhinosinusitis (Yes/No)
36. heart failure (Yes/No)
37. diabetes (Yes/No)
38. coronary heart disease (Yes/No)
39. sex
40. psychotic disorders (Yes/No)
41. outpatient consultation (Yes/No)
42. topical immunosuppressant (Yes/No)
43. CMU (Yes/No)
44. myocardial infarction (Yes/No)
45. atopic dermatitis (Yes/No)

**TABLE S1. Quality of direct matching between cohort of patients with uncontrolled severe asthma and general population**

| Matching variables          | Before Matching                           |                                |                               | After Matching                            |                              |                                |
|-----------------------------|-------------------------------------------|--------------------------------|-------------------------------|-------------------------------------------|------------------------------|--------------------------------|
|                             | Uncontrolled severe asthma cohort (n=739) | General population (n=466,977) | Standardized mean differences | Uncontrolled severe asthma cohort (n=739) | General population (n=2,217) | Standardized mean differences* |
| Age (mean, SD)              | 62.0 (16.7)                               | 48.5 (20.2)                    | 0.7297                        | 62.0 (16.7)                               | 62.0 (16.7)                  | 0.0000                         |
| Sex                         |                                           |                                |                               |                                           |                              |                                |
| Male (n, %)                 | 318 (43.0%)                               | 228 841 (49.0%)                | 0.1201                        | 318 (43.0%)                               | 954 (43.0%)                  | 0.0000                         |
| Female (n, %)               | 421 (57.0%)                               | 238 136 (51.0%)                |                               | 421 (57.0%)                               | 1 263 (57.0%)                |                                |
| Beneficiary of CMU-c (n, %) | 74 (10.0%)                                | 31 778 (6.8%)                  | 0.1158                        | 74 (10.0%)                                | 222 (10.0%)                  | 0.0000                         |

\* A standardized mean difference < 0,1 after matching is considered as acceptable.



**TABLE S2. Quality of propensity score matching between cohort of patients with uncontrolled severe asthma and cohort of patients with asthma**

| Matching variables              | Before Matching                           |                          |                               | After Matching                            |                       |                                |
|---------------------------------|-------------------------------------------|--------------------------|-------------------------------|-------------------------------------------|-----------------------|--------------------------------|
|                                 | Uncontrolled severe asthma cohort (n=739) | Asthma cohort (n=15,849) | Standardized mean differences | Uncontrolled severe asthma cohort (n=739) | Asthma cohort (n=739) | Standardized mean differences* |
| Age (mean, SD)                  | 62.0 (16.7)                               | 54.8 (20.9)              | 0.3826                        | 62.0 (16.7)                               | 63.2 (17.2)           | -0.0688                        |
| Sex                             |                                           |                          |                               |                                           |                       |                                |
| Male (n, %)                     | 318 (43.0%)                               | 7 010 (44.2%)            | 0.0242                        | 318 (43.0%)                               | 347 (47.0%)           | 0.0789                         |
| Female (n, %)                   | 421 (57.0%)                               | 8 839 (55.8%)            |                               | 421 (57.0%)                               | 392 (53.0%)           |                                |
| Beneficiary of CMU-c (n, %)     | 74 (10.0%)                                | 1 536 (9.7%)             | 0.0108                        | 74 (10.0%)                                | 57 (7.7%)             | 0.0810                         |
| Cardiovascular diseases (n, %)  | 405 (54.8%)                               | 6 863 (43.3%)            | 0.2316                        | 405 (54.8%)                               | 431 (58.3%)           | -0.0710                        |
| Coronary heart disease (n, %)   | 55 (7.4%)                                 | 1 036 (6.5%)             | 0.0355                        | 55 (7.4%)                                 | 69 (9.3%)             | -0.0684                        |
| Myocardial infarction (n, %)    | 8 (1.1%)                                  | 179 (1.1%)               | -0.0045                       | 8 (1.1%)                                  | 8 (1.1%)              | 0.0000                         |
| Arrhythmia (n, %)               | 60 (8.1%)                                 | 946 (6.0%)               | 0.0841                        | 60 (8.1%)                                 | 65 (8.8%)             | -0.0243                        |
| Heart failure (n, %)            | 33 (4.5%)                                 | 527 (3.3%)               | 0.0590                        | 33 (4.5%)                                 | 49 (6.6%)             | -0.0947                        |
| Hypertension (n, %)             | 364 (49.3%)                               | 6 178 (39.0%)            | 0.2081                        | 364 (49.3%)                               | 375 (50.7%)           | -0.0298                        |
| Cerebrovascular diseases (n, %) | 27 (3.7%)                                 | 411 (2.6%)               | 0.0610                        | 27 (3.7%)                                 | 29 (3.9%)             | -0.0142                        |
| Dyslipidemia (n, %)             | 237 (32.1%)                               | 4 439 (28.0%)            | 0.0887                        | 237 (32.1%)                               | 268 (36.3%)           | -0.0885                        |
| Diabetes (n, %)                 | 108 (14.6%)                               | 2 047 (12.9%)            | 0.0493                        | 108 (14.6%)                               | 112 (15.2%)           | -0.0152                        |
| Osteoporosis (n, %)             | 110 (14.9%)                               | 1 325 (8.4%)             | 0.2046                        | 110 (14.9%)                               | 112 (15.2%)           | -0.0076                        |
| Psychiatric illness** (n, %)    | 224 (30.3%)                               | 3 671 (23.2%)            | 0.1621                        | 224 (30.3%)                               | 223 (30.2%)           | 0.0029                         |
| Cataract (n, %)                 | 75 (10.1%)                                | 1 049 (6.6%)             | 0.1276                        | 75 (10.1%)                                | 69 (9.3%)             | 0.0274                         |
| Rhinosinusitis (n, %)           | 3 (0.4%)                                  | 17 (0.1%)                | 0.0591                        | 3 (0.4%)                                  | 2 (0.3%)              | 0.0233                         |
| Gastroesophageal reflux (n, %)  | 79 (10.7%)                                | 1 261 (8.0%)             | 0.0941                        | 79 (10.7%)                                | 69 (9.3%)             | 0.0451                         |
| Atopic dermatitis (n, %)        | 1 (0.1%)                                  | 22 (0.1%)                | -0.0009                       | 1 (0.1%)                                  | 0 (0.0%)              | 0.0521                         |
| Nasal polyposis (n, %)          | 14 (1.9%)                                 | 91 (0.6%)                | 0.1198                        | 14 (1.9%)                                 | 5 (0.7%)              | 0.1083                         |
| Nasal antihistamine (n, %)      | 1 (0.1%)                                  | 197 (1.2%)               | -0.1342                       | 1 (0.1%)                                  | 3 (0.4%)              | -0.0521                        |
| Ocular antihistamine (n, %)     | 4 (0.5%)                                  | 589 (3.7%)               | -0.2213                       | 4 (0.5%)                                  | 6 (0.8%)              | -0.0330                        |
| Systemic antihistamine (n, %)   | 65 (8.8%)                                 | 7 892 (49.8%)            | -1.0090                       | 65 (8.8%)                                 | 75 (10.1%)            | -0.0462                        |
| Nasal corticosteroid (n, %)     | 10 (1.4%)                                 | 6 597 (41.6%)            | -1.1249                       | 10 (1.4%)                                 | 15 (2.0%)             | -0.0525                        |

1  
2  
3  
4  
5  
6  
7  
8  
9  
10  
11  
12  
13  
14  
15  
16  
17  
18  
19  
20  
21  
22  
23  
24  
25  
26  
27  
28  
29  
30  
31  
32  
33  
34  
35  
36  
37  
38  
39  
40  
41  
42  
43  
44  
45  
46  
47  
48  
49  
50  
51  
52  
53  
54  
55  
56  
57  
58  
59  
60

|                                                           |              |                |         |              |              |         |
|-----------------------------------------------------------|--------------|----------------|---------|--------------|--------------|---------|
| Non-steroidal anti-inflammatory drugs (n, %)              | 70 (9.5%)    | 7 756 (48.9%)  | -0.9634 | 70 (9.5%)    | 73 (9.9%)    | -0.0137 |
| Antibiotic (n, %)                                         | 170 (23.0%)  | 10 249 (64.7%) | -0.9251 | 170 (23.0%)  | 184 (24.9%)  | -0.0444 |
| Proton pump inhibitor (n, %)                              | 122 (16.5%)  | 6 776 (42.8%)  | -0.6001 | 122 (16.5%)  | 132 (17.9%)  | -0.0359 |
| Psychotropic drug (n, %)                                  | 128 (17.3%)  | 6 091 (38.4%)  | -0.4844 | 128 (17.3%)  | 172 (23.3%)  | -0.1484 |
| Dermocorticoids (n, %)                                    | 19 (2.6%)    | 3 321 (21.0%)  | -0.5954 | 19 (2.6%)    | 25 (3.4%)    | -0.0478 |
| Topical immunosuppressant (n, %)                          | 1 (0.1%)     | 31 (0.2%)      | -0.0148 | 1 (0.1%)     | 0 (0.0%)     | 0.0521  |
| Outpatient consultation (n, %)                            | 656 (88.8%)  | 14 159 (89.3%) | -0.0182 | 656 (88.8%)  | 668 (90.4%)  | -0.0532 |
| Hospital consultation (n, %)                              | 193 (26.1%)  | 3 685 (23.3%)  | 0.0665  | 193 (26.1%)  | 171 (23.1%)  | 0.0691  |
| Consultation with a nurse (n, %)                          | 551 (74.6%)  | 9 941 (62.7%)  | 0.2572  | 551 (74.6%)  | 548 (74.2%)  | 0.0093  |
| Consultation with a physiotherapist (n, %)                | 383 (51.8%)  | 6 754 (42.6%)  | 0.1853  | 383 (51.8%)  | 363 (49.1%)  | 0.0541  |
| Hospitalization (n, %)                                    | 468 (63.3%)  | 8 834 (55.7%)  | 0.1551  | 468 (63.3%)  | 475 (64.3%)  | -0.0197 |
| Emergency room visits (n, %)                              | 356 (48.2%)  | 6 442 (40.6%)  | 0.1519  | 356 (48.2%)  | 349 (47.2%)  | 0.0190  |
| Number of outpatient consultations (mean, SD)             | 36.9 (30.0)  | 29.2 (25.9)    | 0.2724  | 36.9 (30.0)  | 33.7 (26.7)  | 0.1128  |
| Number of hospital consultations (mean, SD)               | 3.4 (10.2)   | 2.4 (7.9)      | 0.1094  | 3.4 (10.2)   | 3.3 (10.0)   | 0.0175  |
| Number of consultations with a nurse (mean, SD)           | 53.5 (195.3) | 27.9 (132.7)   | 0.1535  | 53.5 (195.3) | 41.6 (162.1) | 0.0665  |
| Number of consultations with a physiotherapist (mean, SD) | 37.0 (98.8)  | 21.1 (62.3)    | 0.1935  | 37.0 (98.8)  | 34.1 (104.0) | 0.0286  |
| Number of hospitalizations (mean, SD)                     | 2.3 (5.0)    | 1.6 (4.0)      | 0.1514  | 2.3 (5.0)    | 2.4 (5.0)    | -0.0057 |
| Number of emergency room visits (mean, SD)                | 1.2 (2.2)    | 0.9 (1.9)      | 0.1606  | 1.2 (2.2)    | 1.2 (1.9)    | 0.0340  |
| Charlson's score (mean, SD)                               | 3.6 (2.3)    | 3.0 (2.3)      | 0.2588  | 3.6 (2.3)    | 3.8 (2.4)    | -0.0702 |

\* A standardized mean difference < 0,1 after matching is considered as acceptable.

\*\*Psychiatric illness includes depression, anxiety, and psychotic disorders.

**FIGURE S2. Quality of propensity score matching between cohort of patients with uncontrolled severe asthma and cohort of patients with asthma**



A standardized mean difference < 0,1 after matching is considered as acceptable.

**FIGURE S3. Analysis of mortality by age group**

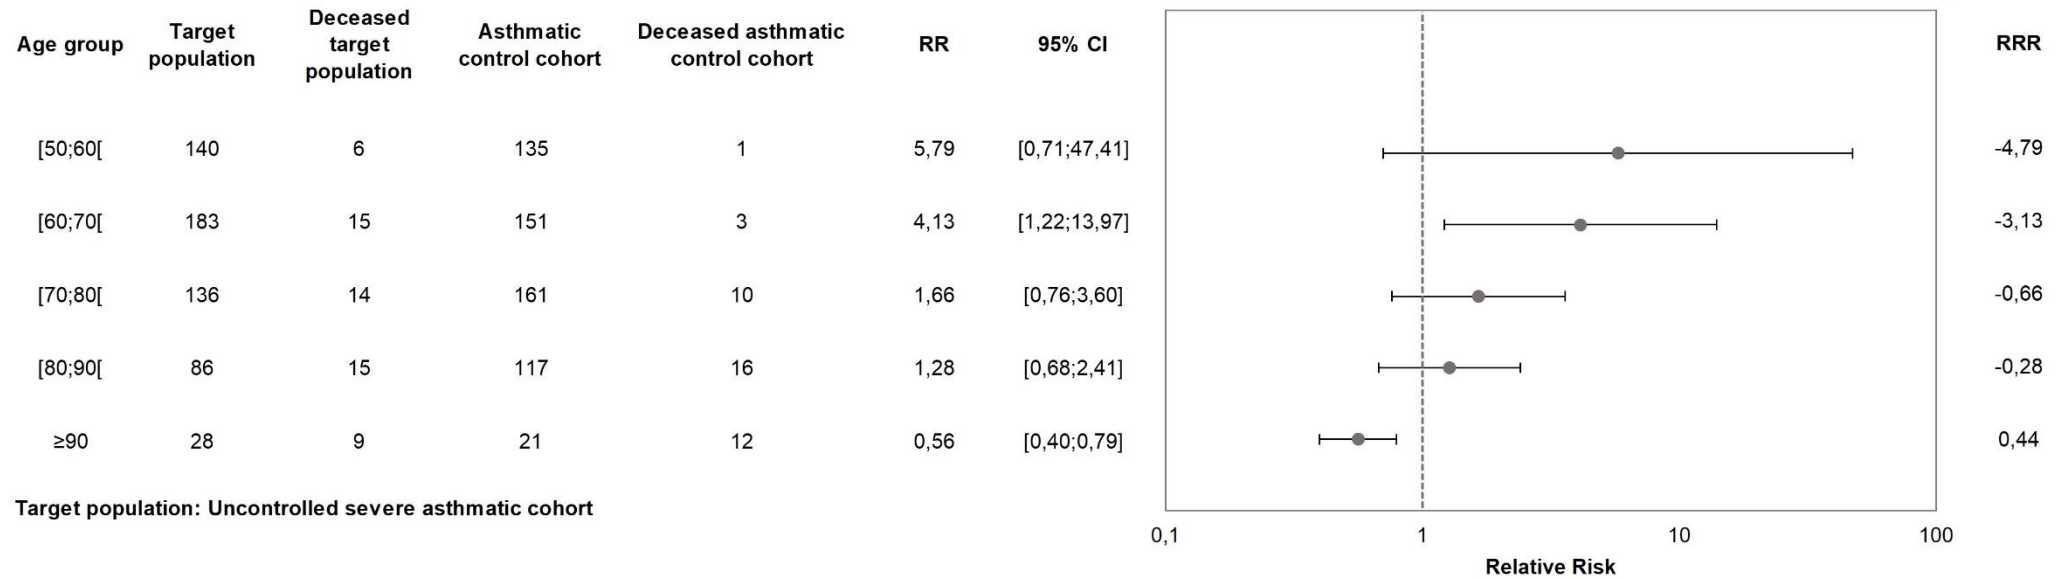

**Table S3. Results of multivariate Cox model on mortality**

| Covariate                                                                                                            | Hazard ratio | 95% CI      |
|----------------------------------------------------------------------------------------------------------------------|--------------|-------------|
| Age (1-year increase)                                                                                                | 1.07         | 1.05 - 1.09 |
| History of cardiovascular diseases (with vs. without)                                                                | 1.91         | 1.18 - 3.09 |
| History of diabetes (with vs. without)                                                                               | 1.66         | 1.11 - 2.49 |
| History of cancer (with vs. without)                                                                                 | 2.40         | 1.64 - 3.50 |
| Patients with uncontrolled severe asthma vs. general population in population with history of psychiatric disease    | 1.22         | 0.66 - 2.26 |
| Patients with uncontrolled severe asthma vs. general population in population without history of psychiatric disease | 3.25         | 2.14 - 4.92 |
| History of psychiatric disease (with vs. without) in uncontrolled severe asthma cohort                               | 0.93         | 0.52 – 1.65 |
| History of psychiatric disease (with vs. without) in general population cohort                                       | 2.46         | 1.54 – 3.92 |

Key: CI – confidence interval.

**FIGURE S4. 24-month survival for the uncontrolled severe asthmatic cohort versus general population among subjects without history of psychiatric disease**



review only

STROBE Statement—Checklist of items that should be included in reports of *cohort studies*

|                              | Item No | Recommendation                                                                                                                                                                                                                                                                                                         | Page No          |
|------------------------------|---------|------------------------------------------------------------------------------------------------------------------------------------------------------------------------------------------------------------------------------------------------------------------------------------------------------------------------|------------------|
| <b>Title and abstract</b>    | 1       | (a) Indicate the study's design with a commonly used term in the title or the abstract<br>(b) Provide in the abstract an informative and balanced summary of what was done and what was found                                                                                                                          | 1-3              |
| <b>Introduction</b>          |         |                                                                                                                                                                                                                                                                                                                        |                  |
| Background/rationale         | 2       | Explain the scientific background and rationale for the investigation being reported                                                                                                                                                                                                                                   | 5                |
| Objectives                   | 3       | State specific objectives, including any prespecified hypotheses                                                                                                                                                                                                                                                       | 5                |
| <b>Methods</b>               |         |                                                                                                                                                                                                                                                                                                                        |                  |
| Study design                 | 4       | Present key elements of study design early in the paper                                                                                                                                                                                                                                                                | 6                |
| Setting                      | 5       | Describe the setting, locations, and relevant dates, including periods of recruitment, exposure, follow-up, and data collection                                                                                                                                                                                        | 6                |
| Participants                 | 6       | (a) Give the eligibility criteria, and the sources and methods of selection of participants. Describe methods of follow-up<br>(b) For matched studies, give matching criteria and number of exposed and unexposed                                                                                                      | 7                |
| Variables                    | 7       | Clearly define all outcomes, exposures, predictors, potential confounders, and effect modifiers. Give diagnostic criteria, if applicable                                                                                                                                                                               | 7-8              |
| Data sources/<br>measurement | 8*      | For each variable of interest, give sources of data and details of methods of assessment (measurement). Describe comparability of assessment methods if there is more than one group                                                                                                                                   | 6                |
| Bias                         | 9       | Describe any efforts to address potential sources of bias                                                                                                                                                                                                                                                              | 7                |
| Study size                   | 10      | Explain how the study size was arrived at                                                                                                                                                                                                                                                                              | 7<br>(Figure S1) |
| Quantitative variables       | 11      | Explain how quantitative variables were handled in the analyses. If applicable, describe which groupings were chosen and why                                                                                                                                                                                           | 8                |
| Statistical methods          | 12      | (a) Describe all statistical methods, including those used to control for confounding<br>(b) Describe any methods used to examine subgroups and interactions<br>(c) Explain how missing data were addressed<br>(d) If applicable, explain how loss to follow-up was addressed<br>(e) Describe any sensitivity analyses | 8-9              |
| <b>Results</b>               |         |                                                                                                                                                                                                                                                                                                                        |                  |
| Participants                 | 13*     | (a) Report numbers of individuals at each stage of study—eg numbers potentially eligible, examined for eligibility, confirmed eligible, included in the study, completing follow-up, and analysed<br>(b) Give reasons for non-participation at each stage<br>(c) Consider use of a flow diagram                        | 10               |
| Descriptive data             | 14*     | (a) Give characteristics of study participants (eg demographic, clinical, social) and information on exposures and potential confounders<br>(b) Indicate number of participants with missing data for each variable of interest<br>(c) Summarise follow-up time (eg, average and total amount)                         | 10               |
| Outcome data                 | 15*     | Report numbers of outcome events or summary measures over time                                                                                                                                                                                                                                                         | 10-16            |

|    |                          |    |                                                                                                                                                                                                              |
|----|--------------------------|----|--------------------------------------------------------------------------------------------------------------------------------------------------------------------------------------------------------------|
| 1  |                          |    |                                                                                                                                                                                                              |
| 2  |                          |    |                                                                                                                                                                                                              |
| 3  | Main results             | 16 | (a) Give unadjusted estimates and, if applicable, confounder-adjusted estimates and their precision (eg, 95% confidence interval). Make clear which confounders were adjusted for and why they were included |
| 4  |                          |    |                                                                                                                                                                                                              |
| 5  |                          |    |                                                                                                                                                                                                              |
| 6  |                          |    | (b) Report category boundaries when continuous variables were categorized                                                                                                                                    |
| 7  |                          |    |                                                                                                                                                                                                              |
| 8  |                          |    | (c) If relevant, consider translating estimates of relative risk into absolute risk for a meaningful time period                                                                                             |
| 9  |                          |    |                                                                                                                                                                                                              |
| 10 |                          |    |                                                                                                                                                                                                              |
| 11 | Other analyses           | 17 | Report other analyses done—eg analyses of subgroups and interactions, and sensitivity analyses                                                                                                               |
| 12 |                          |    |                                                                                                                                                                                                              |
| 13 |                          |    |                                                                                                                                                                                                              |
| 14 | <b>Discussion</b>        |    |                                                                                                                                                                                                              |
| 15 | Key results              | 18 | Summarise key results with reference to study objectives                                                                                                                                                     |
| 16 | Limitations              | 19 | Discuss limitations of the study, taking into account sources of potential bias or imprecision. Discuss both direction and magnitude of any potential bias                                                   |
| 17 |                          |    |                                                                                                                                                                                                              |
| 18 | Interpretation           | 20 | Give a cautious overall interpretation of results considering objectives, limitations, multiplicity of analyses, results from similar studies, and other relevant evidence                                   |
| 19 |                          |    |                                                                                                                                                                                                              |
| 20 | Generalisability         | 21 | Discuss the generalisability (external validity) of the study results                                                                                                                                        |
| 21 |                          |    |                                                                                                                                                                                                              |
| 22 |                          |    |                                                                                                                                                                                                              |
| 23 | <b>Other information</b> |    |                                                                                                                                                                                                              |
| 24 | Funding                  | 22 | Give the source of funding and the role of the funders for the present study and, if applicable, for the original study on which the present article is based                                                |
| 25 |                          |    |                                                                                                                                                                                                              |
| 26 |                          |    |                                                                                                                                                                                                              |
| 27 |                          |    |                                                                                                                                                                                                              |
| 28 |                          |    |                                                                                                                                                                                                              |
| 29 |                          |    |                                                                                                                                                                                                              |
| 30 |                          |    |                                                                                                                                                                                                              |
| 31 |                          |    |                                                                                                                                                                                                              |
| 32 |                          |    |                                                                                                                                                                                                              |
| 33 |                          |    |                                                                                                                                                                                                              |
| 34 |                          |    |                                                                                                                                                                                                              |
| 35 |                          |    |                                                                                                                                                                                                              |
| 36 |                          |    |                                                                                                                                                                                                              |
| 37 |                          |    |                                                                                                                                                                                                              |
| 38 |                          |    |                                                                                                                                                                                                              |
| 39 |                          |    |                                                                                                                                                                                                              |
| 40 |                          |    |                                                                                                                                                                                                              |
| 41 |                          |    |                                                                                                                                                                                                              |
| 42 |                          |    |                                                                                                                                                                                                              |
| 43 |                          |    |                                                                                                                                                                                                              |
| 44 |                          |    |                                                                                                                                                                                                              |
| 45 |                          |    |                                                                                                                                                                                                              |
| 46 |                          |    |                                                                                                                                                                                                              |
| 47 |                          |    |                                                                                                                                                                                                              |
| 48 |                          |    |                                                                                                                                                                                                              |
| 49 |                          |    |                                                                                                                                                                                                              |
| 50 |                          |    |                                                                                                                                                                                                              |
| 51 |                          |    |                                                                                                                                                                                                              |
| 52 |                          |    |                                                                                                                                                                                                              |
| 53 |                          |    |                                                                                                                                                                                                              |
| 54 |                          |    |                                                                                                                                                                                                              |
| 55 |                          |    |                                                                                                                                                                                                              |
| 56 |                          |    |                                                                                                                                                                                                              |
| 57 |                          |    |                                                                                                                                                                                                              |
| 58 |                          |    |                                                                                                                                                                                                              |
| 59 |                          |    |                                                                                                                                                                                                              |
| 60 |                          |    |                                                                                                                                                                                                              |

\*Give information separately for exposed and unexposed groups.

**Note:** An Explanation and Elaboration article discusses each checklist item and gives methodological background and published examples of transparent reporting. The STROBE checklist is best used in conjunction with this article (freely available on the Web sites of PLoS Medicine at <http://www.plosmedicine.org/>, Annals of Internal Medicine at <http://www.annals.org/>, and Epidemiology at <http://www.epidem.com/>). Information on the STROBE Initiative is available at <http://www.strobe-statement.org>.
